# Supplementary material for: Expanding the miRNA Transcriptome of Human Kidney and Renal Cell Carcinoma
Source: Int J Genomics. 2018 Jul 3;2018:6972397. doi: 10.1155/2018/6972397 (PMC6051088; doi:10.1155/2018/6972397)
Supplement: Supplementary 4 — Table 1: summary of OASIS output and subsequent filtering steps of predicted novel miRNAs detected in kidney tissues. This table lists the raw output of the computational analysis deducing previously undetected miRNAs from RNA-sequencing data of nonmalignant (NM) and clear cell renal cell carcinoma samples (TP) (columns A–E) and the results from further filtering steps (columns F–J) as described in the “Materials and Methods.” Table 2: cell line characteristics and next-generation sequencing information for the NCI-60 renal cell lines used to validate the discovery of previously unannotated miRNA sequences. Table 3: predicted target genes of the newly detected miRNAs differentially expressed in clear cell renal cell carcinoma. This table lists the output values of the miRanda target prediction algorithm used to predict the protein-coding genes targeted by previously undetected miRNAs in kidney samples, as described in “Materials and Methods.” [file 6972397.f4.xls]

## Sheet: Supplemental Table 1
Supplemental Table 1. Summary of OASIS output and subsequent filtering steps of predicted novel miRNAs detected in kidney tissues.
This table lists the raw output of the computational analysis deducing previously-undetected miRNAs from RNA-sequencing data of non-malignant (NM) and ccRCC samples (TP) (columns A-E), and the results from further filtering steps as described in the Materials and Methods section (columns F-J).
Novel miRNA ID	MiRDeep2 Score	Total Read Count	Mature Sequence	Mature Coordinate	BLASTn Validation	G/C Content Red = >2STD from mean	NCI-60 Validation	Previously Described By *Queried in REF[16,17,25-27]	Previously Described Tissue *None previously described in kidney	Validated Sequence
Knm17_967_NM	31090.8	60678	ggagagaacgcggucugag	chr17:19190033..19190051:-	E>0.1 | Validated	63.1579	Validated	Londin et al., 2015	Unknown	ggagagaacgcggucugag
Knm7_2198_NM	5076.6	9349	aauuacagauugucucagaga	chr7:139044137..139044157:-	E>0.1 | Validated	33.3333	Not Validated	N/A	N/A	N/A
Knm17_992_NM	3256	6371	uacccuguagauccgaauu	chr17:48579908..48579926:-	E<0.1 | Not Validated	42.1053	Validated	Londin et al., 2015	Unknown	N/A
KnmX_2628_NM	518.7	1002	gagucuccaguaauggacggga	chrX:136550928..136550949:+	E<0.1 | Not Validated	54.5455	Not Validated	N/A	N/A	N/A
Knm16_789_NM	378.2	735	agcuugucggaugugcagauu	chr16:12500703..12500723:+	E>0.1 | Validated	47.619	Validated	N/A	N/A	agcuugucggaugugcagauu
Knm22_1472_NM	320.5	537	cacugccuucuccuuccccgcc	chr22:50487862..50487883:+	E>0.1 | Validated	68.1818	Not Validated	Londin et al., 2015|Backes et al., 2016	Unknown|Blood	N/A
Knm9_2316_NM	219.1	417	aaaagcuguccacuguagagu	chr9:32456350..32456370:-	E>0.1 | Validated	42.8571	Validated	N/A	N/A	aaaagcuguccacuguagagu
Knm5_1802_NM	115.3	155	caugugagucucggagggcugu	chr5:177385483..177385504:+	E>0.1 | Validated	59.0909	Not Validated	N/A	N/A	N/A
Knm4_1680_NM	83.4	163	uccccaggagccugacuggagc	chr4:128602144..128602165:+	E>0.1 | Validated	68.1818	Validated	N/A	N/A	uccccaggagccugacuggagc
Knm10_277_NM	74.8	124	cucugcgaggcgcggcaggca	chr10:100748924..100748944:+	E>0.1 | Validated	76.1905	Not Validated	N/A	N/A	N/A
Knm19_1083_NM	55.2	89	gcacacauacaaacaaacacac	chr19:43268264..43268285:+	E>0.1 | Validated	40.9091	Validated	N/A	N/A	gcacacauacaaacaaacacac
Knm15_733_NM	43.4	69	ugggaagaguugagacugaaag	chr15:57550197..57550218:+	E>0.1 | Validated	45.4545	Validated	N/A	N/A	ugggaagaguugagacugaaag
Knm12_557_NM	36.6	67	ugccgcacuucucccuacagg	chr12:6333147..6333167:-	E>0.1 | Validated	61.9048	Validated	N/A	N/A	ugccgcacuucucccuacagg
Knm6_2025_NM	5.8	664	cugucggaccuggaacug	chr6:33789090..33789107:-	E>0.1 | Validated	61.1111	Not Validated	Londin et al., 2015	Unknown	N/A
Knm20_1336_NM	5.8	120	cucugcagcugcgcgggcggg	chr20:2652434..2652454:-	E>0.1 | Validated	80.9524	Not Validated	McCall et al., 2017|Backes et al., 2016	Epithelium Keratinocyte (Neonatal)|Blood	N/A
Knm22_1489_NM	5.8	179	uugaggucggacaugguggcu	chr22:40956705..40956725:-	E>0.1 | Validated	57.1429	Not Validated	Londin et al., 2015	Unknown	N/A
Knm20_1317_NM	5.7	213	uuugauuggccaguggacagcg	chr20:18507839..18507860:+	E>0.1 | Validated	54.5455	Validated	McCall et al., 2017	Epithelium Intestinal	uuugauuggccaguggacagcg
Knm3_1550_NM	5.7	73	ucugcugagaguuucugacuga	chr3:134066929..134066950:+	E>0.1 | Validated	45.4545	Validated	N/A	N/A	ucugcugagaguuucugacuga
Knm1_177_NM	5.4	167	uagacuggguugacucuggaga	chr1:119571598..119571619:-	E>0.1 | Validated	50	Validated	N/A	N/A	uagacuggguugacucuggaga
Knm7_2159_NM	5.4	3946	uaaguuuggcuguggacagug	chr7:45104906..45104926:-	E>0.1 | Validated	47.619	Validated	N/A	N/A	uaaguuuggcuguggacagug
Knm6_1930_NM	5.3	426	uuuuuugcuggaacauuuc	chr6:39074360..39074378:+	E>0.1 | Validated	31.5789	Not Validated	N/A	N/A	N/A
Knm8_2223_NM	5.3	114	uuaugccugugacugcuguag	chr8:15545840..15545860:+	E>0.1 | Validated	47.619	Validated	N/A	N/A	uuaugccugugacugcuguag
Knm1_171_NM	5.3	224	cagggccuggaacuccaauggga	chr1:77960394..77960416:-	E>0.1 | Validated	60.8696	Validated	N/A	N/A	cagggccuggaacuccaauggga
Knm8_2270_NM	5.2	130	uuugauaagcugacaugggaca	chr8:99536686..99536707:-	E<0.1 | Not Validated	40.9091	Not Validated	N/A	N/A	N/A
Knm6_2030_NM	5.2	13468	cuuucagucggauguuugc	chr6:71403557..71403575:-	E<0.1 | Not Validated	47.3684	Validated	N/A	N/A	N/A
Knm20_1312_NM	5.2	373	cugcgucuuugugcuuuc	chr20:3917486..3917503:+	E>0.1 | Validated	50	Validated	N/A	N/A	cugcgucuuugugcuuuc
Knm1_145_NM	5.1	76	cuucagcugcagaacucucagu	chr1:23429560..23429581:-	E>0.1 | Validated	50	Validated	McCall et al., 2017	Dendritic	cuucagcugcagaacucucagu
Knm7_2110_NM	5.1	64	aaaggauucagucggagcuc	chr7:99629448..99629467:+	E>0.1 | Validated	50	Validated	N/A	N/A	aaaggauucagucggagcuc
Knm12_604_NM	4.9	590	cccagaaaucugguaugccag	chr12:122709390..122709410:-	E>0.1 | Validated	52.381	Validated	N/A	N/A	cccagaaaucugguaugccag
Knm17_880_NM	4.8	244	ugagcaaacucacaaggc	chr17:19032468..19032485:+	E>0.1 | Validated	50	Not Validated	N/A	N/A	N/A
Knm11_444_NM	4.7	202	ucucuggccugucuccugcag	chr11:74007138..74007158:-	E>0.1 | Validated	61.9048	Validated	N/A	N/A	ucucuggccugucuccugcag
KnmX_2675_NM	4.7	2239	augacagauugacauggacaauu	chrX:119787353..119787375:-	E>0.1 | Validated	34.7826	Validated	N/A	N/A	augacagauugacauggacaauu
Knm12_524_NM	4.5	865	uguagggauggaagccaugaaa	chr12:97563873..97563894:+	E<0.1 | Not Validated	45.4545	Not Validated	N/A	N/A	N/A
Knm15_773_NM	4.4	158	cacuagagugugagcucc	chr15:78624213..78624230:-	E>0.1 | Validated	55.5556	Validated	N/A	N/A	cacuagagugugagcucc
Knm20_1353_NM	4.3	4004	cucuggagcuuucguacaugc	chr20:38425195..38425215:-	E>0.1 | Validated	52.381	Validated	N/A	N/A	cucuggagcuuucguacaugc
Knm7_2083_NM	4.3	17	cugucucagagccuggag	chr7:30664819..30664836:+	E>0.1 | Validated	61.1111	Not Validated	N/A	N/A	N/A
Knm11_472_NM	4.1	2339	ugagguaguagguuguau	chr11:122146572..122146589:-	E<0.1 | Not Validated	38.8889	Not Validated	McCall et al., 2017	Blood	N/A
KnmX_2598_NM	4	518	ugauuggaagaaacucugcaaca	chrX:15716321..15716343:+	E<0.1 | Not Validated	39.1304	Validated	N/A	N/A	N/A
Knm12_555_NM	3.5	148	acuguagccucuucugcuugg	chr12:4837841..4837861:-	E>0.1 | Validated	52.381	Not Validated	McCall et al., 2017	Dendritic	N/A
Knm7_2157_NM	3.3	258	uaagauuuugaccagugggga	chr7:44383380..44383400:-	E>0.1 | Validated	42.8571	Validated	N/A	N/A	uaagauuuugaccagugggga
Knm3_1615_NM	3	3479	aauugcaggacucuaaacauuu	chr3:131479097..131479118:-	E>0.1 | Validated	31.8182	Not Validated	McCall et al., 2017	Epithelium Renal Proximal	N/A
Knm4_1672_NM	1.9	192	guuucaauacuuuaucugcucu	chr4:114656811..114656832:+	E<0.1 | Not Validated	31.8182	Validated	N/A	N/A	N/A
KnmX_2684_NM	1.8	70	cguccauuacuggagacuc	chrX:136550928..136550946:-	E>0.1 | Validated	52.6316	Not Validated	N/A	N/A	N/A
Knm12_583_NM	1.7	186	uuacuccuaacgucacaguguag	chr12:79463362..79463384:-	E>0.1 | Validated	43.4783	Validated	N/A	N/A	uuacuccuaacgucacaguguag
Knm2_1160_NM	1.7	234	agcccagaagcuggaaacugcag	chr2:69175544..69175566:+	E>0.1 | Validated	56.5217	Validated	Londin et al., 2015	Unknown	agcccagaagcuggaaacugcag
Knm22_1464_NM	1.5	3819	gaugccugggaguugcgaucugc	chr22:42615368..42615390:+	E>0.1 | Validated	60.8696	Validated	N/A	N/A	gaugccugggaguugcgaucugc
Knm19_1138_NM	1.4	4299	cacgucccuguucgggcgc	chr19:57513045..57513063:-	E<0.1 | Not Validated	73.6842	Not Validated	N/A	N/A	N/A
Knm12_551_NM	1.3	82	ucaagacugucggagaugccaga	chr12:77159..77181:-	E>0.1 | Validated	52.1739	Not Validated	N/A	N/A	N/A
Knm12_539_NM	1.3	107	accagaagccuggcuugucag	chr12:122695926..122695946:+	E>0.1 | Validated	57.1429	Not Validated	N/A	N/A	N/A
Knm14_711_NM	1.3	269	ugaucugccggccuuggcucc	chr14:54974586..54974606:-	E>0.1 | Validated	66.6667	Not Validated	N/A	N/A	N/A
Knm21_1422_NM	1.2	236	guuaagaugacagagccca	chr21:36278959..36278977:+	E>0.1 | Validated	47.3684	Validated	N/A	N/A	guuaagaugacagagccca
Knm17_1137_TP	66610.8	130435	ggagagaacgcggucugag	chr17:19112424..19112442:-	E>0.1 | Validated	63.1579	Validated	Londin et al., 2015	Unknown	ggagagaacgcggucugag
Knm22_1790_TP	3292.1	6454	gaugccugggaguugcgaucugc	chr22:42615368..42615390:+	E>0.1 | Validated	60.8696	Validated	N/A	N/A	gaugccugggaguugcgaucugc
Knm8_2704_TP	1673.6	3270	uuugauaagcugacaugggaca	chr8:99536686..99536707:-	E<0.1 | Not Validated	40.9091	Not Validated	N/A	N/A	N/A
Knm3_1968_TP	1241.2	2413	gcagauucccagagugggacag	chr3:122973740..122973761:-	E>0.1 | Validated	59.0909	Validated	Londin et al., 2015|Backes et al., 2016	Unknown|Blood	gcagauucccagagugggacag
Knm9_2754_TP	659.6	1277	aaaagcuguccacuguagagu	chr9:32456350..32456370:-	E>0.1 | Validated	42.8571	Validated	N/A	N/A	aaaagcuguccacuguagagu
Knm16_949_TP	467.9	911	agcuugucggaugugcagauu	chr16:12500703..12500723:+	E>0.1 | Validated	47.619	Validated	Londin et al., 2015	Unknown	agcuugucggaugugcagauu
Knm20_1636_TP	168.7	320	cucugcagcugcgcgggcggg	chr20:2652434..2652454:-	E>0.1 | Validated	80.9524	Not Validated	N/A	N/A	N/A
Knm2_1384_TP	106.6	194	uugaaaaguucacgauugagc	chr2:21506070..21506090:+	E>0.1 | Validated	38.0952	Not Validated	N/A	N/A	N/A
Knm6_2425_TP	100.6	171	gcccggagagcugggagccag	chr6:41733554..41733574:-	E>0.1 | Validated	76.1905	Validated	N/A	N/A	N/A
Knm22_1773_TP	94	166	ugguccaacgacaggaguag	chr22:20065180..20065199:+	E>0.1 | Validated	55	Validated	Londin et al., 2015|Backes et al., 2016	Unknown|Blood	ugguccaacgacaggaguag
Knm3_1987_TP	88.6	141	agguuguaggaugcuaaacaga	chr3:143783125..143783146:-	E>0.1 | Validated	40.9091	Validated	Londin et al., 2015|Backes et al., 2016	Unknown|Blood	agguuguaggaugcuaaacaga
Knm2_1514_TP	74.8	136	guccccagacucucccgggcugu	chr2:17753308..17753330:-	E>0.1 | Validated	69.5652	Validated	Londin et al., 2015	Unknown	guccccagacucucccgggcugu
Knm1_77_TP	73	130	ccccucaguccaccagagcccgg	chr1:93846843..93846865:+	E<0.1 | Not Validated	73.913	Validated	N/A	N/A	N/A
Knm1_249_TP	72.4	131	gucguugcuuaccagaaguuca	chr1:160342488..160342509:-	E>0.1 | Validated	45.4545	Validated	N/A	N/A	gucguugcuuaccagaaguuca
Knm19_1363_TP	71.2	127	cuggccagacaggugaccccag	chr19:47226942..47226963:-	E>0.1 | Validated	68.1818	Validated	McCall et al., 2017|Londin et al., 2015|Backes et al., 2016	Brain, Prefrontal Cortex|Unknown|Blood	cuggccagacaggugaccccag
Knm9_2722_TP	67.5	128	ucuucaggaacucuggcuaacu	chr9:37804264..37804285:+	E>0.1 | Validated	45.4545	Validated	N/A	N/A	ucuucaggaacucuggcuaacu
Knm16_973_TP	58.1	104	cuuccaucuccaucaccuugag	chr16:81533905..81533926:+	E>0.1 | Validated	50	Validated	N/A	N/A	cuuccaucuccaucaccuugag
Knm9_2759_TP	56.8	101	cugccuguacaugugaacguu	chr9:35096059..35096079:-	E>0.1 | Validated	47.619	Validated	Londin et al., 2015	Unknown	cugccuguacaugugaacguu
Knm1_183_TP	48	90	cccauacuuucaccccucucu	chr1:44884292..44884312:-	E>0.1 | Validated	52.381	Validated	McCall et al., 2017|Londin et al., 2015	Lung|Unknown	cccauacuuucaccccucucu
Knm22_1801_TP	47.2	81	cagcuuugcagguggugacuaga	chr22:26572327..26572349:-	E>0.1 | Validated	52.1739	Validated	N/A	N/A	cagcuuugcagguggugacuaga
Knm11_484_TP	45	84	uucgcugggaauucagccucugc	chr11:100970911..100970933:+	E>0.1 | Validated	56.5217	Validated	McCall et al., 2017	Dendritic	uucgcugggaauucagccucugc
Knm7_2512_TP	43.6	76	aaaggauucagucggagcuc	chr7:99629448..99629467:+	E>0.1 | Validated	50	Validated	N/A	N/A	aaaggauucagucggagcuc
Knm9_2756_TP	42.5	81	acuagagauagcaguugguccag	chr9:32542561..32542583:-	E>0.1 | Validated	47.8261	Validated	N/A	N/A	acuagagauagcaguugguccag
Knm2_1482_TP	37.1	44	uuucagaugguucucuagaga	chr2:218040996..218041016:+	E>0.1 | Validated	38.0952	Not Validated	N/A	N/A	N/A
Knm12_685_TP	35.1	58	ugccgcacuucucccuacagg	chr12:6333147..6333167:-	E>0.1 | Validated	61.9048	Validated	N/A	N/A	ugccgcacuucucccuacagg
Knm12_660_TP	6	173	ugugggacuucuggccuugacu	chr12:104591685..104591706:+	E<0.1 | Not Validated	54.5455	Validated	N/A	N/A	N/A
Knm18_1200_TP	6	195	uuucagacaucagcugcaagc	chr18:8891671..8891691:+	E>0.1 | Validated	47.619	Validated	Londin et al., 2015	Unknown	uuucagacaucagcugcaagc
Knm10_366_TP	5.9	121	ucgccagugaguuucggugcgg	chr10:127737220..127737241:+	E>0.1 | Validated	63.6364	Not Validated	N/A	N/A	N/A
Knm6_2421_TP	5.8	822	cugucggaccuggaacugc	chr6:33789089..33789107:-	E>0.1 | Validated	63.1579	Not Validated	McCall et al., 2017|Backes et al., 2016	Epithelium Keratinocyte (Neonatal)|Blood	N/A
Knm22_1819_TP	5.8	491	uugaggucggacaugguggcu	chr22:40956705..40956725:-	E>0.1 | Validated	57.1429	Validated	N/A	N/A	uugaggucggacaugguggcu
Knm3_1875_TP	5.8	91	uucccaagugucuuggaccagg	chr3:43179515..43179536:+	E>0.1 | Validated	54.5455	Not Validated	N/A	N/A	N/A
Knm11_500_TP	5.8	177	cugggcaaagaacuccaagugc	chr11:133142877..133142898:+	E>0.1 | Validated	54.5455	Validated	McCall et al., 2017	Epithelium Intestinal	cugggcaaagaacuccaagugc
Knm3_1894_TP	5.7	112	ucugcugagaguuucugacuga	chr3:134066929..134066950:+	E>0.1 | Validated	45.4545	Validated	Londin et al., 2015	Unknown	ucugcugagaguuucugacuga
Knm20_1603_TP	5.7	412	uuugauuggccaguggacagcg	chr20:18507839..18507860:+	E>0.1 | Validated	54.5455	Validated	N/A	N/A	uuugauuggccaguggacagcg
Knm1_188_TP	5.5	1205	uuuggucuaaccgguugucuag	chr1:59921700..59921721:-	E>0.1 | Validated	45.4545	Not Validated	N/A	N/A	N/A
Knm12_741_TP	5.4	70	caggguacccucucguugcag	chr12:121004493..121004513:-	E>0.1 | Validated	61.9048	Validated	N/A	N/A	caggguacccucucguugcag
Knm17_1038_TP	5.4	86	ugucacucuuguguguugcag	chr17:16450540..16450560:+	E>0.1 | Validated	47.619	Validated	N/A	N/A	ugucacucuuguguguugcag
Knm1_36_TP	5.3	66	augguuagcacucaggaca	chr1:22197266..22197284:+	E>0.1 | Validated	47.3684	Validated	N/A	N/A	augguuagcacucaggaca
Knm8_2643_TP	5.3	183	uuaugccugugacugcuguag	chr8:15545840..15545860:+	E>0.1 | Validated	47.619	Validated	N/A	N/A	uuaugccugugacugcuguag
Knm2_1433_TP	5.3	109	uuguguccaguuguugggggag	chr2:111135385..111135406:+	E>0.1 | Validated	54.5455	Validated	N/A	N/A	uuguguccaguuguugggggag
Knm1_201_TP	5.3	267	cagggccuggaacuccaauggga	chr1:77960394..77960416:-	E>0.1 | Validated	60.8696	Validated	N/A	N/A	cagggccuggaacuccaauggga
Knm18_1227_TP	5.3	126	gaggagagagcgagagugcau	chr18:75210853..75210873:+	E>0.1 | Validated	57.1429	Not Validated	N/A	N/A	N/A
Knm6_2314_TP	5.3	460	uuuuuugcuggaacauuuc	chr6:39074360..39074378:+	E>0.1 | Validated	31.5789	Not Validated	N/A	N/A	N/A
Knm4_2016_TP	5.2	165	ggccgcguggccucauugg	chr4:3415215..3415233:+	E>0.1 | Validated	73.6842	Validated	N/A	N/A	ggccgcguggccucauugg
Knm6_2465_TP	5.2	128	ugagguaguagguggugugc	chr6:158493844..158493863:-	E<0.1 | Not Validated	55	Validated	N/A	N/A	N/A
Knm17_1173_TP	5.2	46559	guaguguuuccuacuuua	chr17:58331249..58331266:-	E<0.1 | Not Validated	33.3333	Validated	N/A	N/A	N/A
Knm17_1167_TP	5	2723	uagguaguuucauguugu	chr17:48632536..48632553:-	E<0.1 | Not Validated	33.3333	Validated	N/A	N/A	N/A
Knm19_1374_TP	5	1954	ucacgucccuguucgggcgcca	chr19:57513043..57513064:-	E<0.1 | Not Validated	68.1818	Validated	N/A	N/A	N/A
Knm17_1040_TP	4.8	110	ugagcaaacucacaaggc	chr17:19032468..19032485:+	E>0.1 | Validated	50	Not Validated	N/A	N/A	N/A
Knm12_650_TP	4.5	314	uguagggauggaagccaugaaa	chr12:97563873..97563894:+	E<0.1 | Not Validated	45.4545	Not Validated	N/A	N/A	N/A
Knm6_2419_TP	4.5	1048	ggcucuguggcuuaguuggc	chr6:28648261..28648280:-	E>0.1 | Validated	60	Validated	N/A	N/A	ggcucuguggcuuaguuggc
Knm6_2323_TP	4.4	730	ccagggcagacucugagacaga	chr6:44005334..44005355:+	E>0.1 | Validated	59.0909	Validated	N/A	N/A	ccagggcagacucugagacaga
Knm15_927_TP	4.4	711	cacuagagugugagcucc	chr15:78624213..78624230:-	E>0.1 | Validated	55.5556	Validated	N/A	N/A	cacuagagugugagcucc
Knm20_1655_TP	4.3	4855	cucuggagcuuucguacaugc	chr20:38425195..38425215:-	E>0.1 | Validated	52.381	Validated	N/A	N/A	cucuggagcuuucguacaugc
Knm1_68_TP	4	155	cuuuccuagagucucugaagc	chr1:78620448..78620468:+	E>0.1 | Validated	47.619	Not Validated	N/A	N/A	N/A
KnmX_3004_TP	4	904	ugauuggaagaaacucugcaac	chrX:15716321..15716342:+	E<0.1 | Not Validated	40.9091	Validated	N/A	N/A	N/A
Knm1_272_TP	3.9	163	uuggcugaugaauacugacu	chr1:173865755..173865774:-	E>0.1 | Validated	40	Validated	N/A	N/A	uuggcugaugaauacugacu
Knm10_419_TP	3.7	457	uaacuuuggccaguuggaaga	chr10:117285333..117285353:-	E>0.1 | Validated	42.8571	Validated	N/A	N/A	uaacuuuggccaguuggaaga
Knm12_681_TP	3.5	341	cuguagccucuucugcuugg	chr12:4837841..4837860:-	E>0.1 | Validated	55	Not Validated	McCall et al., 2017	Dendritic	N/A
Knm7_2563_TP	3.3	422	uaagauuuugaccagugggga	chr7:44383380..44383400:-	E>0.1 | Validated	42.8571	Validated	N/A	N/A	uaagauuuugaccagugggga
Knm3_1975_TP	3	3158	aaauugcaggacucuaaacauuu	chr3:131479097..131479119:-	E>0.1 | Validated	30.4348	Validated	N/A	N/A	N/A
Knm16_995_TP	3	357	cuguauagaguuaaggaaca	chr16:58548502..58548521:-	E>0.1 | Validated	35	Not Validated	N/A	N/A	N/A
Knm3_1900_TP	2	306	aucaaugucauugucacugaga	chr3:153388438..153388459:+	E>0.1 | Validated	36.3636	Not Validated	Londin et al., 2015	Unknown	N/A
Knm10_357_TP	2	297	ugugaugcucaguuguguguag	chr10:122416986..122417007:+	E<0.1 | Not Validated	45.4545	Validated	N/A	N/A	N/A
Knm9_2785_TP	1.9	2523	uagcugaucagccugaug	chr9:100814697..100814714:-	E>0.1 | Validated	50	Validated	N/A	N/A	uagcugaucagccugaug
Knm2_1407_TP	1.9	530	auccuagcuugccugagacugu	chr2:71526828..71526849:+	E>0.1 | Validated	50	Validated	N/A	N/A	auccuagcuugccugagacugu
KnmX_3074_TP	1.8	321	cguccauuacuggagacuc	chrX:136550928..136550946:-	E>0.1 | Validated	52.6316	Not Validated	N/A	N/A	N/A
Knm2_1402_TP	1.7	303	agcccagaagcuggaaacugcag	chr2:69175544..69175566:+	E>0.1 | Validated	56.5217	Validated	N/A	N/A	agcccagaagcuggaaacugcag
KnmX_3077_TP	1.6	318	cucagucucaucugcaaaga	chrX:151959642..151959661:-	E<0.1 | Not Validated	45	Validated	N/A	N/A	N/A
Knm17_1130_TP	1.6	462	ugagguggaggguuguggga	chr17:9798079..9798098:-	E>0.1 | Validated	60	Validated	Londin et al., 2015	Unknown	ugagguggaggguuguggga
Knm19_1270_TP	1.5	79	cuuccccacccucuccugcag	chr19:12952668..12952688:+	E>0.1 | Validated	66.6667	Validated	N/A	N/A	cuuccccacccucuccugcag
Knm19_1295_TP	1.4	94	ggucccaugggguaauggg	chr19:42059657..42059675:+	E>0.1 | Validated	63.1579	Validated	N/A	N/A	ggucccaugggguaauggg
Knm12_GL877875v1_alt_2815_TP	1.3	130	ucaagacugucggagaugccaga	chr12_GL877875v1_alt:71174..71196:-	E>0.1 | Validated	52.1739	Not Validated	McCall et al., 2017	Placenta	N/A
Knm5_2192_TP	1.1	124	cugacucugaaaucuucuaaau	chr5:55508895..55508916:-	E>0.1 | Validated	31.8182	Validated	N/A	N/A	cugacucugaaaucuucuaaau
Knm1_122_TP	1	351	ugauguaguagauuguau	chr1:192330995..192331012:+	E>0.1 | Validated	27.7778	Validated	Londin et al., 2015	Unknown	N/A
Knm7_3340_TP	12888.7	24116	aauuacagauugucucagaga	chr7:139044137..139044157:-	E>0.1 | Validated	33.3333	Validated	N/A	N/A	aauuacagauugucucagaga
Knm17_1472_TP	6742.7	13213	uacccuguagauccgaauu	chr17:48579908..48579926:-	E<0.1 | Not Validated	42.1053	Validated	N/A	N/A	N/A
Knm17_1411_TP	348.4	672	gcgccgccgcccccccccgcg	chr17:81961470..81961490:+	E>0.1 | Validated	100	Validated	N/A	N/A	N/A
Knm12_839_TP	75.5	145	accagaagccuggcuugucag	chr12:122709351..122709371:+	E>0.1 | Validated	57.1429	Not Validated	Londin et al., 2015	Unknown	N/A
Knm2_1765_TP	57	102	uuguguccaguuguuggggga	chr2:111135385..111135405:+	E>0.1 | Validated	52.381	Validated	N/A	N/A	uuguguccaguuguuggggga
Knm2_1820_TP	18.8	15	cucuagagaaccaucugaaag	chr2:218041022..218041042:+	E>0.1 | Validated	42.8571	Validated	N/A	N/A	cucuagagaaccaucugaaag
Knm1_98_TP	6.1	103	cuugagacucugggucagu	chr1:95154874..95154892:+	E>0.1 | Validated	52.6316	Validated	N/A	N/A	cuugagacucugggucagu
Knm16_1254_TP	5.9	254	ccgcgcggggggcccgggc	chr16:2777158..2777176:-	E>0.1 | Validated	100	Validated	McCall et al., 2017	SkinEpidermis	N/A
Knm22_2192_TP	5.8	119	uagguggccugacuggcag	chr22:35426105..35426123:+	E>0.1 | Validated	63.1579	Validated	N/A	N/A	uagguggccugacuggcag
Knm12_803_TP	5.7	131	gcggcggcggcggcucugggu	chr12:76031477..76031497:+	E>0.1 | Validated	85.7143	Not Validated	McCall et al., 2017	Testes	N/A
Knm3_2420_TP	5.6	2280	gcagauucccagagugggac	chr3:122973742..122973761:-	E>0.1 | Validated	60	Not Validated	N/A	N/A	N/A
Knm6_3086_TP	5.5	27344	cuuucagucggauguuugc	chr6:71403557..71403575:-	E<0.1 | Not Validated	47.3684	Validated	Londin et al., 2015	Unknown	N/A
Knm4_2508_TP	5.5	276	gguuucaauacuuuaucugcu	chr4:114656810..114656830:+	E<0.1 | Not Validated	33.3333	Validated	N/A	N/A	N/A
Knm1_65_TP	5.4	5585	cuuucagucggauguuuac	chr1:40754413..40754431:+	E<0.1 | Not Validated	42.1053	Validated	N/A	N/A	N/A
Knm6_2932_TP	5.3	393	uuuuugcuggaacauuuc	chr6:39074361..39074378:+	E>0.1 | Validated	33.3333	Not Validated	N/A	N/A	N/A
Knm22_2209_TP	5.2	106	agcugccaguugaauaac	chr22:24697708..24697725:-	E>0.1 | Validated	44.4444	Validated	N/A	N/A	agcugccaguugaauaac
Knm1_31_TP	5.1	218	ucuuaccagacaugguuaga	chr1:1169021..1169040:+	E<0.1 | Not Validated	40	Validated	N/A	N/A	N/A
KnmX_3926_TP	4.9	804	agcuacauugucugcuggg	chrX:45746184..45746202:-	E<0.1 | Not Validated	52.6316	Validated	N/A	N/A	N/A
Knm11_716_TP	4.7	114	ucucuggccugucuccugcag	chr11:74007138..74007158:-	E>0.1 | Validated	61.9048	Validated	N/A	N/A	ucucuggccugucuccugcag
KnmX_3965_TP	4.7	2846	augacagauugacauggacaauu	chrX:119787353..119787375:-	E>0.1 | Validated	34.7826	Validated	McCall et al., 2017	Bladder	augacagauugacauggacaauu
Knm6_2978_TP	4.7	539	ugcccugaagcacugaag	chr6:114341324..114341341:+	E>0.1 | Validated	55.5556	Not Validated	N/A	N/A	N/A
KnmX_3979_TP	4.5	224	aacuauucccuuucugaguag	chrX:145994286..145994306:-	E<0.1 | Not Validated	38.0952	Not Validated	N/A	N/A	N/A
KnmX_3920_TP	4.2	5392	ugagaugaagcacuucag	chrX:39702636..39702653:-	E>0.1 | Validated	44.4444	Validated	McCall et al., 2017	Blood	ugagaugaagcacuucag
KnmX_3856_TP	4	872	ugauuggaagaaacucugcaaca	chrX:15716321..15716343:+	E<0.1 | Not Validated	39.1304	Validated	N/A	N/A	N/A
Knm14_1087_TP	4	12790	ugagaugacccacuguag	chr14:69875395..69875412:-	E>0.1 | Validated	50	Validated	N/A	N/A	ugagaugacccacuguag
Knm15_1180_TP	3.6	220	uaucucgguggcaccucc	chr15:73754326..73754343:-	E>0.1 | Validated	61.1111	Validated	N/A	N/A	uaucucgguggcaccucc
Knm12_851_TP	3.5	549	acuguagccucuucugcuugg	chr12:4837841..4837861:-	E>0.1 | Validated	52.381	Not Validated	N/A	N/A	N/A
Knm20_2011_TP	3.4	244	uagcugccaguucaagaag	chr20:9995956..9995974:-	E>0.1 | Validated	47.3684	Validated	N/A	N/A	uagcugccaguucaagaag
Knm13_956_TP	3	279	cuguaguguuccuggagaagc	chr13:45337108..45337128:-	E>0.1 | Validated	52.381	Not Validated	N/A	N/A	N/A
Knm14_1048_TP	2.7	1132	uuagaggaagcaguguag	chr14:28087495..28087512:-	E>0.1 | Validated	44.4444	Not Validated	Backes et al., 2016	Blood	N/A
Knm11_723_TP	2.7	628	gcauuggaggcucagugg	chr11:79272874..79272891:-	E>0.1 | Validated	61.1111	Not Validated	N/A	N/A	N/A
Knm11_605_TP	1.9	499	cuggaugacccugacaagcugu	chr11:69382653..69382674:+	E>0.1 | Validated	54.5455	Validated	N/A	N/A	cuggaugacccugacaagcugu
Knm19_1680_TP	1.9	127	agaugaccuggucaccgug	chr19:45786440..45786458:-	E>0.1 | Validated	57.8947	Not Validated	N/A	N/A	N/A
Knm9_3521_TP	1.8	2420	uuaguguuuccuauuuua	chr9:25170267..25170284:-	E>0.1 | Validated	22.2222	Not Validated	N/A	N/A	N/A
Knm14_1011_TP	1.6	121	aacuuuccugugauaacuuu	chr14:83716451..83716470:+	E>0.1 | Validated	30	Not Validated	N/A	N/A	N/A
Knm20_1988_TP	1.5	145	cuggcgcuuucacacacuc	chr20:38449488..38449506:+	E>0.1 | Validated	57.8947	Validated	N/A	N/A	cuggcgcuuucacacacuc
Knm19_1696_TP	1.4	3471	cacgucccuguucgggcgcca	chr19:57513043..57513063:-	E<0.1 | Not Validated	71.4286	Validated	N/A	N/A	N/A
Knm21_2146_TP	1.2	623	guuaagaugacagagccca	chr21:36278959..36278977:+	E>0.1 | Validated	47.3684	Validated	N/A	N/A	guuaagaugacagagccca
Knm11_598_TP	70.1	137	cugaagauuugaaccaagcu	chr11:108094455..108094474:+	E>0.1 | Validated	40	Not Validated	Londin et al., 2015	Unknown	N/A
KnmX_3591_TP	61.4	111	agauugcucuuugacuaauuag	chrX:36106265..36106286:+	E>0.1 | Validated	31.8182	Validated	Londin et al., 2015	Unknown	agauugcucuuugacuaauuag
Knm1_77_TP	46.5	81	cucaggacugggucauucuguu	chr1:43600468..43600489:+	E>0.1 | Validated	50	Validated	Londin et al., 2015	Unknown	cucaggacugggucauucuguu
Knm19_1501_TP	6	163	gccgcgauggcgcuguuggccgg	chr19:35249017..35249039:+	E>0.1 | Validated	78.2609	Validated	McCall et al., 2017	Testes	N/A
Knm7_2944_TP	5.7	66	cggcucuggccuccugacccag	chr7:114922161..114922182:+	E>0.1 | Validated	72.7273	Validated	McCall et al., 2017	Plasma	cggcucuggccuccugacccag
Knm8_3091_TP	5.3	183	uuaugccugugacugcuguaga	chr8:15545840..15545861:+	E>0.1 | Validated	45.4545	Validated	McCall et al., 2017	B Cell_Pre-germinal center	uuaugccugugacugcuguaga
Knm7_2962_TP	5.3	636	cucugaccucugacccucuagc	chr7:143382572..143382593:+	E>0.1 | Validated	59.0909	Validated	N/A	N/A	cucugaccucugacccucuagc
Knm1_227_TP	5.1	69	cuucagcugcagaacucucagu	chr1:23429560..23429581:-	E>0.1 | Validated	50	Validated	N/A	N/A	cuucagcugcagaacucucagu
Knm10_440_TP	4.7	81	ugauuuucauuggacagu	chr10:122410424..122410441:+	E>0.1 | Validated	33.3333	Not Validated	N/A	N/A	N/A
Knm1_98_TP	4.7	240	gugucccaucugggucgcca	chr1:74744616..74744635:+	E>0.1 | Validated	65	Validated	N/A	N/A	gugucccaucugggucgcca
Knm11_678_TP	4.7	169	ucucuggccugucuccugcagc	chr11:74007137..74007158:-	E>0.1 | Validated	63.6364	Not Validated	N/A	N/A	N/A
Knm16_1165_TP	4.6	357	ugagggagcaggaugaauagcu	chr16:14530095..14530116:-	E>0.1 | Validated	50	Validated	N/A	N/A	ugagggagcaggaugaauagcu
Knm3_2261_TP	3	6014	uaaauugcaggacucuaaacauuu	chr3:131479097..131479120:-	E>0.1 | Validated	29.1667	Validated	N/A	N/A	N/A
Knm5_2593_TP	2.6	143	caucaccaguauuagagg	chr5:102795400..102795417:-	E>0.1 | Validated	44.4444	Validated	N/A	N/A	caucaccaguauuagagg
Knm1_69_TP	2.2	508	uacagugucacuagaauc	chr1:32167441..32167458:+	E>0.1 | Validated	38.8889	Not Validated	Londin et al., 2015	Unknown	N/A
Knm11_564_TP	1.9	71	gcaccccucuugcuccuaccagc	chr11:64361112..64361134:+	E>0.1 | Validated	65.2174	Validated	N/A	N/A	gcaccccucuugcuccuaccagc
Knm13_910_TP	1.8	142	cucggagcuuugcugaaacug	chr13:50125524..50125544:-	E>0.1 | Validated	52.381	Not Validated	N/A	N/A	N/A
Knm17_1490_TP	22025.7	43187	acccuguagauccgaauuugu	chr17:48579905..48579925:-	E<0.1 | Not Validated	42.8571	Validated	Londin et al., 2015	Unknown	N/A
Knm22_2289_TP	82.2	77	cagacugucugugcuguggacu	chr22:43614839..43614860:-	E>0.1 | Validated	54.5455	Validated	N/A	N/A	cagacugucugugcuguggacu
Knm3_2418_TP	5.6	82	uguguugcauguguguauaugu	chr3:31161753..31161774:-	E>0.1 | Validated	36.3636	Not Validated	N/A	N/A	N/A
Knm9_3565_TP	5.1	3671	uucacaguggcuaaguucugc	chr9:95085505..95085525:+	E<0.1 | Not Validated	47.619	Validated	N/A	N/A	N/A
Knm7_3404_TP	4.9	102	cugugguucugcaugaagaca	chr7:139227645..139227665:-	E>0.1 | Validated	47.619	Validated	N/A	N/A	cugugguucugcaugaagaca
Knm8_3532_TP	4.5	8951	cuuucagucagauguuugc	chr8:134804882..134804900:-	E<0.1 | Not Validated	42.1053	Validated	N/A	N/A	N/A
Knm21_2196_TP	4.3	3086	uagcuuaucgggcugaug	chr21:38399558..38399575:+	E>0.1 | Validated	50	Validated	N/A	N/A	uagcuuaucgggcugaug
Knm7_3203_TP	4.3	13	cugucucagagccuggag	chr7:30664819..30664836:+	E>0.1 | Validated	61.1111	Not Validated	N/A	N/A	N/A
Knm19_1615_TP	3.9	284	uucuguaguagguuguagu	chr19:12322984..12323002:+	E>0.1 | Validated	36.8421	Validated	N/A	N/A	uucuguaguagguuguagu
Knm18_1562_TP	3.8	78	aaaaccaucuggacgcaggga	chr18:74148995..74149015:+	E>0.1 | Validated	52.381	Validated	N/A	N/A	aaaaccaucuggacgcaggga
Knm4_2613_TP	3.7	1113	ugagaugaagcacaggagaaa	chr4:35752492..35752512:-	E>0.1 | Validated	42.8571	Validated	N/A	N/A	ugagaugaagcacaggagaaa
Knm7_3414_TP	2.6	3265	uucucugaagcacugaag	chr7:144467225..144467242:-	E>0.1 | Validated	44.4444	Not Validated	N/A	N/A	N/A
Knm21_2191_TP	2.4	1080	cacuguagaauggauuugc	chr21:33916015..33916033:+	E>0.1 | Validated	42.1053	Validated	N/A	N/A	cacuguagaauggauuugc
Knm10_526_TP	2.2	144	agaagcacuagucuaugaccaug	chr10:106043965..106043987:-	E>0.1 | Validated	43.4783	Validated	N/A	N/A	agaagcacuagucuaugaccaug
Knm12_805_TP	2.1	210	cgcgucggucugggaagucgcg	chr12:93570989..93571010:+	E>0.1 | Validated	72.7273	Not Validated	N/A	N/A	N/A
Knm6_3173_TP	1.8	417	uuuucaguuggguguuugc	chr6:155847658..155847676:-	E>0.1 | Validated	42.1053	Validated	N/A	N/A	uuuucaguuggguguuugc
Knm13_972_TP	1.8	152	cucggagcuuugcugaaacugc	chr13:50125523..50125544:-	E>0.1 | Validated	54.5455	Not Validated	N/A	N/A	N/A
Knm1_142_TP	1.7	304	aagcugucaguugaaggac	chr1:149622040..149622058:+	E>0.1 | Validated	47.3684	Validated	N/A	N/A	aagcugucaguugaaggac
Knm7_3399_TP	1.7	3950	uucucugaagaacuguag	chr7:133589484..133589501:-	E>0.1 | Validated	38.8889	Not Validated	N/A	N/A	N/A
Knm14_1083_TP	1	13066	ugagggaguugguuguguga	chr14:39162954..39162973:-	E>0.1 | Validated	50	Validated	N/A	N/A	ugagggaguugguuguguga
Knm2_1960_TP	1	90	ugagauaauaggcugugggc	chr2:128494694..128494713:-	E>0.1 | Validated	50	Validated	N/A	N/A	ugagauaauaggcugugggc
Knm11_802_TP	70400	138070	ugagguaguagguuguauagu	chr11:122146569..122146589:-	E<0.1 | Not Validated	38.0952	Validated	N/A	N/A	N/A
KnmX_4237_TP	670.8	892	uguuugcagaggaaacugaga	chrX:151959676..151959696:-	E<0.1 | Not Validated	42.8571	Validated	N/A	N/A	N/A
Knm1_317_TP	126.2	238	uagacuggguugacucuggaga	chr1:119608771..119608792:-	E>0.1 | Validated	50	Validated	Londin et al., 2015	Unknown	uagacuggguugacucuggaga
Knm10_427_TP	52.4	58	uacagaucugggucucuuaga	chr10:4960954..4960974:+	E>0.1 | Validated	42.8571	Validated	N/A	N/A	uacagaucugggucucuuaga
Knm5_2910_TP	49.6	68	caugugagucucggagggcugu	chr5:177385483..177385504:+	E>0.1 | Validated	59.0909	Not Validated	N/A	N/A	N/A
Knm2_1960_TP	19.8	19	uucagaugguucucuagag	chr2:218040997..218041015:+	E>0.1 | Validated	42.1053	Not Validated	Londin et al., 2015	Unknown	N/A
Knm1_152_TP	5.7	109	uccuccucgucggccucuucggc	chr1:150364751..150364773:+	E>0.1 | Validated	69.5652	Validated	N/A	N/A	uccuccucgucggccucuucggc
Knm19_1702_TP	5.6	88	uugccucucccgucccuguag	chr19:3201502..3201522:+	E>0.1 | Validated	61.9048	Validated	N/A	N/A	uugccucucccgucccuguag
Knm3_2519_TP	5.3	8519	ugagaucaagcaguguag	chr3:5238659..5238676:-	E>0.1 | Validated	44.4444	Validated	N/A	N/A	ugagaucaagcaguguag
Knm17_1443_TP	5.3	132	ugggucuaggggugggaac	chr17:28747771..28747789:+	E>0.1 | Validated	63.1579	Validated	N/A	N/A	ugggucuaggggugggaac
Knm3_2521_TP	5	5044	gauuggaagacacucugcgacagug	chr3:12840312..12840336:-	E<0.1 | Not Validated	52	Validated	N/A	N/A	N/A
Knm3_2528_TP	5	126	auucccagggaagugcucugau	chr3:39264925..39264946:-	E>0.1 | Validated	50	Not Validated	N/A	N/A	N/A
Knm11_693_TP	4	18	aagcaggaagcaguguagg	chr11:124446004..124446022:+	E>0.1 | Validated	52.6316	Not Validated	N/A	N/A	N/A
Knm5_2934_TP	4	616	gagggaagcauuggacugug	chr5:35854184..35854203:-	E>0.1 | Validated	55	Validated	N/A	N/A	gagggaagcauuggacugug
KnmX_4217_TP	3.7	110	gaucaucaugguaacggguaga	chrX:110198350..110198371:-	E>0.1 | Validated	45.4545	Validated	N/A	N/A	gaucaucaugguaacggguaga
Knm19_1812_TP	2	320	agaugaccuggucaccguguggu	chr19:45786436..45786458:-	E>0.1 | Validated	56.5217	Validated	N/A	N/A	agaugaccuggucaccguguggu
Knm6_3325_TP	1.8	325	uuucaguuggguguuugc	chr6:155847658..155847675:-	E>0.1 | Validated	44.4444	Validated	N/A	N/A	uuucaguuggguguuugc
Knm12_953_TP	1.7	96	uuacuccuaacgucacaguguag	chr12:79463362..79463384:-	E>0.1 | Validated	43.4783	Validated	N/A	N/A	uuacuccuaacgucacaguguag
Knm7_3908_TP	1241.7	1637	ccgcacuguggguacuugcug	chr7:100094003..100094023:-	E<0.1 | Not Validated	61.9048	Validated	N/A	N/A	N/A
Knm2_2197_TP	887.6	1680	uucaaguaauucaggauaggu	chr2:218402657..218402677:+	E<0.1 | Not Validated	33.3333	Validated	Londin et al., 2015	Unknown	N/A
Knm6_3605_TP	83.8	133	gcccggagagcugggagccaga	chr6:41733553..41733574:-	E>0.1 | Validated	72.7273	Validated	N/A	N/A	gcccggagagcugggagccaga
Knm5_3166_TP	50.5	84	cagauuuccugggcuuaguga	chr5:102787538..102787558:+	E>0.1 | Validated	47.619	Validated	N/A	N/A	cagauuuccugggcuuaguga
Knm2_2194_TP	34.6	36	uuucagaugguucucuagag	chr2:218040996..218041015:+	E>0.1 | Validated	40	Not Validated	Londin et al., 2015	Unknown	N/A
Knm22_2659_TP	5.6	91	caaugcccaggucugcccuaga	chr22:38244804..38244825:-	E>0.1 | Validated	59.0909	Validated	N/A	N/A	caaugcccaggucugcccuaga
Knm11_KI270832v1_alt_4278_TP	5.4	71	cuguagggcccagugcucagc	chr11_KI270832v1_alt:140356..140376:+	E>0.1 | Validated	66.6667	Not Validated	N/A	N/A	N/A
Knm19_1895_TP	3.9	444	uucuguaguagguuguag	chr19:12322984..12323001:+	E>0.1 | Validated	38.8889	Validated	Londin et al., 2015	Unknown	uucuguaguagguuguag
Knm18_1828_TP	3.8	86	aaaaccaucuggacgcagggac	chr18:74148995..74149016:+	E>0.1 | Validated	54.5455	Validated	N/A	N/A	aaaaccaucuggacgcagggac
Knm9_4220_TP	3.4	1492	agcgggugcuguaggcuuu	chr9:95142447..95142465:-	E>0.1 | Validated	57.8947	Validated	N/A	N/A	agcgggugcuguaggcuuu
Knm22_2623_TP	2.7	126	ugacucccagggacugccuuag	chr22:27920527..27920548:+	E>0.1 | Validated	59.0909	Validated	McCall et al., 2017	Lung Adenocarcinoma	ugacucccagggacugccuuag
Knm6_3675_TP	2	83	gugcgaugaggggaguccugagc	chr6:166955819..166955841:-	E>0.1 | Validated	65.2174	Validated	N/A	N/A	gugcgaugaggggaguccugagc
Knm10_477_TP	1.6	681	uucugcccagugcucugc	chr10:36992379..36992396:+	E>0.1 | Validated	61.1111	Validated	N/A	N/A	uucugcccagugcucugc
								Skin
								Colon adenocarcinoma
								Bladder
								Hepatocellular carcinoma (HepG2)
								Cervical cancer
								Retina
								Coronary Endothelial Cell
								Lung cancer
								Biliosphere
								Immort. Mammary Epi
								Endothelial Aortic
								Cervical cancer
								Plasma Cell
								Mesangial
								Testes
								Retina
								Lung
								CD4+ T Cell
								Placenta
								Blood
								Smooth Muscle Cell, Coronary
								Retina
								Plasma
								Colon adenocarcinoma
								Skin
								Skin
								Dendritic
								T cell leukemia
								B Cell Centroblast
								Brain, Frontal Cortex
								Brain, Prefrontal Cortex
								Colon adenocarcinoma
								Adrenal
								H9 Differentiated Mesenchymal
								Placenta
								H9 Differentiated Midbrain
								Brain, Prefrontal Cortex
								Islet Alpha Cell
								Retina
								Brain, Cerebellum
								BrainFrontal
								Cervical cancer
								Brain, Prefrontal Cortex
								Neural Stem Cell
								Neuron Cortical
								Cervical cancer
								Embryonic lung fibroblast
								Neuron Cortical
								T cell leukemia
								Thyroid
								T cell leukemia
								Bladder
								Blood
								Cervical cancer
								Placenta
								Hepatocellular carcinoma (HepG2)
								Colon adenocarcinoma
								Myotube Skeletal Muscle
								BrainPrefrontalCortex
								Lung
								Neuron iPSC
								Colon adenocarcinoma
								Biliosphere
								Hepatocellular carcinoma
								Dendritic
								Neuron iPSC
								Colon adenocarcinoma
								Brain, Prefrontal Cortex
								Dendritic
								Fibroblast Dermal (neonatal)
								Cervical cancer
								Macrophage
								Thyroid
								Biliosphere
								Dendritic
								B cell lymphoblastoid
								Lung
								Retina
								Hepatocellular carcinoma
								Hepatocellular carcinoma (HepG2)
								Thyroid
								Neuron iPSC
								Bladder
								Brain, Prefrontal Cortex
								Skin
								T cell leukemia
								Retina
								Retina
								Retina
								Blood
								BladderEpithelium
								Cervical cancer
								Kidney
								Dendritic
								Neuron Dopaminergic
								Platelet
								Blood
								Hepatocellular carcinoma
								Cervical cancer
								Bladder
								Melanocyte
								Epithelium Retinal Pigment
								Skeletal muscle
								Lung
								Hepatocellular carcinoma (HepG2)
								Kidney
								Myofibroblast
								BladderEpithelium
								Lung Adenocarcinoma
								Thyroid
								Skin
								Cervical cancer
								Adrenal
								Hepatocellular carcinoma (HepG2)
								Neuron iPSC
								Skin
								Breast adenocarcinoma
								Colon adenocarcinoma
								Bladder
								Plasma
								Colon adenocarcinoma
								Plasma
								Placenta
								Colon adenocarcinoma
								Biliosphere
								Cervical cancer
								Cervical cancer
								Hepatocellular carcinoma (HepG2)
								Skeletal Muscle Cell
								Lung Adenocarcinoma
								Prostate adenocarcinoma
								Platelet
								Colon adenocarcinoma
								H9 Differentiated Mesenchymal
								Hepatocellular carcinoma (HepG2)
								Myoblast Skeletal Muscle
								Nasopharyngeal epithelial cell
								Lung
								Placenta
								Dendritic
								Immortalized Bronch. Epi
								Skin
								Hepatocellular carcinoma (HepG2)
								Colon adenocarcinoma
								Colon adenocarcinoma
								Epithelium Retinal Pigment
								Retina
								Retina
								Platelet
								CD4+ T Cell
								Heart
								Red Blood Cell
								Dendritic
								Hepatocellular carcinoma (HepG2)
								Bladder
								Colon adenocarcinoma
								Lung
								Red Blood Cell
								Neuron Dopaminergic
								H7 ESC
								Cervical cancer
								Embryonic kidney
								Retina
								Dendritic
								Colon adenocarcinoma
								Breast adenocarcinoma
								Lung
								T cell leukemia
								SkinDermis
								Myotube Skeletal Muscle
								Bladder
								Myoblast Skeletal Muscle
								Kidney
								Dendritic
								Breast adenocarcinoma
								Retina
								CD8+ T Cell (Adult)
								T cell leukemia
								T cell leukemia
								Platelet
								T cell leukemia
								Skin
								Placenta
								Lung Adenocarcinoma
								SkinDermis
								Smooth Muscle Cell Bladder
								Cervical cancer
								SkinDermis
								Colon adenocarcinoma
								Lung
								Lung
								Brain, Cerebellum
								Dendritic
								Skin
								Platelet
								Lung
								BladderEpithelium
								T cell leukemia
								Lung Adenocarcinoma
								T cell leukemia
								Myotube Skeletal Muscle
								Thyroid
								Monocytic leukemia
								Blood
								Biliosphere
								Colon adenocarcinoma
								Fat
								B Cell_Pre-germinal center
								Endothelial Coronary (0529)
								Platelet
								Retina
								Colon adenocarcinoma
								Neuron Cortical
								T cell leukemia
								Dendritic
								Dendritic
								Breast ductal carcinoma
								BrainPrefrontalCortex
								Epithelium Intestinal
								Skin
								CD4+ T Cell
								Biliosphere
								T cell leukemia
								Testes
								Melanocyte
								Hepatocellular carcinoma (HepG2)
								Lung
								Brain, Prefrontal Cortex
								SkinDermis
								Plasma
								Skin
								Placenta
								Cumulus Oophorus
								Skin
								Platelet
								T cell leukemia
								H9 Differentiated Forebrain
								Platelet
								T cell leukemia
								Bladder
								SkinDermis
								Biliosphere
								Cervical cancer
								Blood
								Neuron iPSC
								Retina
								Skin
								HUVEC
								Colon adenocarcinoma
								Retina
								Colon adenocarcinoma
								Bladder
								Brain, Prefrontal Cortex
								Tongue squamous carcinoma
								Osteoblast
								Plasma
								Lung
								Brain, Prefrontal Cortex
								Cervical cancer
								Cervical cancer
								Plasma
								Cervical cancer
								B Cell Centrocyte
								Colon adenocarcinoma
								Hepatocellular carcinoma (HepG2)
								Cervical cancer
								Brain, Prefrontal Cortex
								Brain, Prefrontal Cortex
								Lung
								Lung cancer
								Epithelium Retinal Pigment
								SkinEpidermis
								B cell lymphoblastoid
								Skin
								SkinEpidermis
								Immort. Mammary Epi
								Plasma Cell
								Embryonic lung fibroblast
								CD4+ T Cell
								Dendritic
								Epithelium Colonic Epithelium (flow)
								Placenta
								Lung
								Lung cancer
								Fibroblast strain
								Skin
								Red Blood Cell
								Skin
								Cervical cancer
								Islet Beta Cell
								Lung
								Lung
								Neuron iPSC
								Colon adenocarcinoma
								Macrophage
								Myoblast Skeletal Muscle
								Lung
								Lung Adenocarcinoma
								Colon adenocarcinoma
								Melanoma
								Lung
								T cell leukemia
								iPSC-CM
								Myoblast Skeletal Muscle
								Embryonic kidney
								H9 ESC
								Blood
								Placenta
								Skin
								Colon adenocarcinoma
								Neuron Cortical
								Retina
								Neuron Dopaminergic
								B cell lymphoblastoid
								Epithelium Keratinocyte (Neonatal)
								SkinDermis
								Skin
								Cervical cancer
								Smooth Muscle Cell Bladder
								Breast ductal carcinoma
								Dendritic
								BrainFrontal
								T cell leukemia
								Smooth Muscle Cell Aorta
								Cervical cancer
								Brain, Prefrontal Cortex
								Lung
								SkinEpidermis
								Dendritic
								Kidney
								Kidney
								Dendritic
								Neuron iPSC
								Thyroid
								Neuron iPSC
								Dendritic
								Colon adenocarcinoma
								Retina
								Brain, Prefrontal Cortex
								Skin
								Neuron iPSC
								Mesangial
								Epithelium Retinal Pigment
								Dendritic
								Colon adenocarcinoma
								Lung
								Macrophage
								Myotube Skeletal Muscle
								Brain, Prefrontal Cortex
								Cervical cancer
								Epithelium Retinal Pigment
								Plasma
								Kidney
								Epithelium Retinal Pigment
								Retina
								Epithelium Keratinocyte (Neonatal)
								Testes
								Lung
								Brain, Prefrontal Cortex
								Dendritic
								Corona Radiata
								Cervical cancer
								Epithelium Retinal Pigment
								RPE/Choroid
								Colon adenocarcinoma
								T cell leukemia
								Brain, Prefrontal Cortex
								Lung Adenocarcinoma
								Lung Adenocarcinoma
								Biliosphere
								Neuron iPSC
								Plasma
								Breast ductal carcinoma
								Bladder
								Neuron iPSC
								SkinDermis
								Colon adenocarcinoma
								SkinDermis
								Lung Adenocarcinoma
								T cell leukemia
								Skin
								Retina
								Mesangial
								Neuron iPSC
								Neuron iPSC
								Biliosphere
								Hepatocellular carcinoma (HepG2)
								Lung
								Epithelium Retinal Pigment
								SkinDermis
								RPE/Choroid
								Lung
								Neuron Cortical
								Heart
								Lung
								Brain, Prefrontal Cortex
								CD4+ T Cell
								Astrocytes
								Retina
								Skin
								Lung Adenocarcinoma
								Brain, Prefrontal Cortex
								Smooth Muscle Cell Bladder
								Retina
								Neuron Dopaminergic
								Blood
								Bladder
								T cell leukemia
								Bladder
								CD3+ T Cell Splenic
								Thyroid
								Kidney
								Brain, Prefrontal Cortex
								Platelet
								Endothelial Aortic
								B Cell Centroblast
								T cell leukemia
								SkinDermis
								H9 ESC
								Red Blood Cell
								Blood
								Lung squamous carcinoma
								Melanoma
								Skin
								Kidney
								Brain, Prefrontal Cortex
								Lung
								Plasma
								Islet Beta Cell
								Brain, Prefrontal Cortex
								Testes
								Prostate adenocarcinoma
								Epithelium Retinal Pigment
								Fibroblast strain
								Lung
								Lung Adenocarcinoma
								T cell leukemia
								T cell leukemia
								Thyroid
								Colon adenocarcinoma
								Brain, Prefrontal Cortex
								Cervical cancer
								Hepatocellular carcinoma (HepG2)
								Valve Interstitial Cell
								Placenta
								Smooth Muscle Cell Bladder
								Embryonic kidney
								Kidney
								CD3+ T Cell Splenic
								Cervical cancer
								Dendritic
								Kidney
								Retina
								Dendritic
								B Cell_Pre-germinal center
								Lung
								Cervical cancer
								Epithelium Colonic Epithelium (flow)
								Cervical cancer
								Platelet
								Breast adenocarcinoma
								Cervical cancer
								Brain, Prefrontal Cortex
								Brain, Prefrontal Cortex
								Dendritic
								Dendritic
								Lung
								Lung
								Lung
								Islet Alpha Cell
								Fat
								Epithelium Retinal Pigment
								Lung
								SkinEpidermis
								SkinDermis
								Skin
								SkinDermis
								Breast adenocarcinoma
								Hepatocellular carcinoma (HepG2)
								Plasma
								Brain, Prefrontal Cortex
								Colon adenocarcinoma
								B Cell_memory
								Adrenal
								Endothelial Aortic
								Immortalized Bronch. Epi
								Breast adenocarcinoma
								Retina
								Retina
								Lung Adenocarcinoma
								Melanoma
								Hepatocellular carcinoma (HepG2)
								Cervical cancer
								T cell leukemia
								Retina
								SkinDermis
								Brain, Prefrontal Cortex
								Neuron iPSC
								Platelet
								Platelet
								Embryonic kidney
								Platelet
								Dendritic
								Brain, Prefrontal Cortex
								Retina
								Colon adenocarcinoma
								Lung
								B Cell_memory
								Smooth Muscle Cell Prostate
								Colon adenocarcinoma
								SkinDermis
								Lung
								Islet Alpha Cell
								Fibroblast strain
								Lung Adenocarcinoma
								Islet Alpha Cell
								Neuron iPSC
								Lung Adenocarcinoma
								Lung
								Lung Adenocarcinoma
								Macrophage
								Cervical cancer
								SkinDermis
								Epithelium Keratinocyte (Neonatal)
								Dendritic
								Blood
								Hepatocellular carcinoma (HepG2)
								Colon adenocarcinoma
								T cell leukemia
								Dendritic
								Immort. Mammary Epi
								Plasma Cell
								Neuron iPSC
								Cervical cancer
								Lung
								Red Blood Cell
								Blood
								Endothelial Aortic
								Colon adenocarcinoma
								Colon adenocarcinoma
								Platelet
								Platelet
								Platelet
								Platelet
								CD3+ T Cell Splenic
								Colon adenocarcinoma
								Blood
								Blood
								Smooth Muscle Cell Prostate
								SkinEpidermis
								B Cell Centrocyte
								Brain, Prefrontal Cortex
								CD8+ T Cell (Neonatal)
								Dendritic
								Plasma
								Brain, Prefrontal Cortex
								Bladder
								Dendritic
								Platelet
								Platelet
								Lung
								Lung
								Colon adenocarcinoma
								Fat
								Neuron iPSC
								Red Blood Cell
								Placenta
								Colon adenocarcinoma
								Dendritic
								Epithelium Keratinocyte (Neonatal)
								Epithelium Colonic Epithelium (flow)
								Dendritic
								Fibroblast Aorta Adventitia
								Platelet
								Colon adenocarcinoma
								Nasopharyngeal carcinoma
								Neuron iPSC
								Placenta
								Coronary Endothelial Cell
								Islet Alpha Cell
								Epithelium Intestinal
								Lung
								Testes
								Bladder
								Retina
								Colon adenocarcinoma
								Fat
								BrainFrontal
								Skin
								BrainPrefrontalCortex
								Neuron Cortical
								Brain, Prefrontal Cortex
								Neuron Cortical
								Blood
								Macrophage
								Hodgkin lymphoma
								Brain, Prefrontal Cortex
								Retina
								Neuron Cortical
								Blood
								Skin
								Skin
								Testes
								Lung
								Skin
								BladderEpithelium
								Platelet
								H9 Differentiated Midbrain
								Neuron Dopaminergic
								Epithelium Colonic Epithelium (flow)
								Myoblast Skeletal Muscle
								Lung
								Thyroid
								T cell leukemia
								Retina
								Thyroid
								Dendritic
								Blood
								Blood
								Colon adenocarcinoma
								Plasma
								Islet Beta Cell
								Brain, Prefrontal Cortex
								Hepatocellular carcinoma (HepG2)
								Epithelium Intestinal
								Dendritic
								Dendritic
								Myoblast Skeletal Muscle
								Myoblast Skeletal Muscle
								Cervical cancer
								Thyroid
								Lung Adenocarcinoma
								Plasma
								Hepatocellular carcinoma (HepG2)
								BrainFrontal
								Myoblast Skeletal Muscle
								Colon adenocarcinoma
								Lung Adenocarcinoma
								Brain, Prefrontal Cortex
								T cell leukemia
								Cervical cancer
								Brain, Prefrontal Cortex
								Smooth Muscle Cell, Coronary
								B cell lymphoblastoid
								Prostate adenocarcinoma
								Cervical cancer
								Testes
								Blood
								T cell leukemia
								Skin
								Lung
								Dendritic
								Lung
								Neuron iPSC
								Brain, Prefrontal Cortex
								Blood
								Red Blood Cell
								Brain, Prefrontal Cortex
								Epithelium Keratinocyte (Adult)
								Neuron iPSC
								Lung Adenocarcinoma
								Brain, Prefrontal Cortex
								Bladder
								Adrenal
								Colon adenocarcinoma
								Brain, Prefrontal Cortex
								Bladder
								Brain, Prefrontal Cortex
								Epithelium Mammary
								Skin
								Plasma
								Blood
								BladderEpithelium
								Red Blood Cell
								Dendritic
								Platelet
								Blood
								Platelet
								Platelet
								Colon adenocarcinoma
								Platelet
								CD4+ T Cell
								Brain, Prefrontal Cortex
								Skin
								Skin
								BladderEpithelium
								Brain, Prefrontal Cortex
								Lung
								Embryonic kidney
								CD4+ T Cell
								Plasma
								Dendritic
								Neuron iPSC
								BladderEpithelium
								Placenta
								Lung squamous carcinoma
								Lung
								Lung Adenocarcinoma
								Lung
								Nasopharyngeal carcinoma
								Macrophage
								Neuroblastoma
								Fibroblast strain
								Retina
								Astrocytes
								Retina
								Plasma Cell
								Adult skin fibroblast
								Colon adenocarcinoma
								T cell leukemia
								Dendritic
								Platelet
								H9 Differentiated Mesenchymal
								Neuron iPSC
								Placenta
								Lung cancer
								Neuron Dopaminergic
								Lung
								Bladder
								Retina
								Brain, Prefrontal Cortex
								Fibroblast Periodonal ligament
								Hepatocellular carcinoma (HepG2)
								Lung Adenocarcinoma
								Myoblast Skeletal Muscle
								Epithelium Colonic Epithelium (flow)
								Lung Adenocarcinoma
								Osteoblast
								Lung
								Macrophage
								Skin
								Hepatocellular carcinoma (HepG2)
								Colon adenocarcinoma
								Neuron iPSC
								Neuroblastoma
								T cell leukemia
								Lung
								CD8+ T Cell (Neonatal)
								T cell leukemia
								Bladder
								Macrophage
								Neuron Dopaminergic
								Brain, Prefrontal Cortex
								Colon adenocarcinoma
								Myoblast Skeletal Muscle
								Neuron iPSC
								Colon adenocarcinoma
								Bladder
								Neuron iPSC
								Red Blood Cell
								Kidney
								Brain, Prefrontal Cortex
								Plasma
								Neural Stem Cell
								Macrophage
								Dendritic
								Blood
								Retina
								SkinDermis
								Fibroblast Dermal (adult)
								Placenta
								Breast adenocarcinoma
								Lung squamous carcinoma
								Bladder
								Brain, Prefrontal Cortex
								Placenta
								Skin
								Brain, Prefrontal Cortex
								Bladder
								Colon
								Osteoblast
								Retina
								Thyroid
								B cell lymphoblastoid
								Cervical cancer
								Breast adenocarcinoma
								Skin
								Platelet
								CD3+ T Cell Splenic
								Islet Beta Cell
								iPSC-CM
								Skin
								Skin
								Epithelium Retinal Pigment
								Myotube Skeletal Muscle
								Islet Alpha Cell
								Plasma
								Dendritic
								T cell leukemia
								Cervical cancer
								Testes
								Cervical cancer
								Platelet
								Colon adenocarcinoma
								Neuron iPSC
								Breast adenocarcinoma
								Dendritic
								Dendritic
								Lung Adenocarcinoma
								Neuron iPSC
								T cell leukemia
								Plasma
								Dendritic
								Testes
								Coronary Endothelial Cell
								Skin
								Lung
								Testes
								T cell leukemia
								SkinEpidermis
								Skin
								Lung
								Dendritic
								B Cell Centroblast
								Brain, Prefrontal Cortex
								Lung Adenocarcinoma
								Plasma Cell
								Platelet
								Epithelium Colonic Epithelium (flow)
								Macrophage
								Biliosphere
								Lung
								Biliosphere
								Thyroid
								Fibroblast Dermal (adult)
								Brain, Prefrontal Cortex
								Smooth Muscle Cell, Coronary
								Mesangial
								Plasma
								Fat
								Dendritic
								Breast adenocarcinoma
								Neuron Cortical
								Lung
								Biliosphere
								Dendritic
								Epithelium Keratinocyte (Adult)
								H9 ESC
								H9 ESC
								CD4+ T Cell
								Lung
								Dendritic
								BrainPrefrontalCortex
								Colon adenocarcinoma
								Colon adenocarcinoma
								Blood
								T cell leukemia
								Plasma
								Neuron iPSC
								Lung
								Brain, Prefrontal Cortex
								Brain, Frontal Cortex
								Stromal cell Prostate
								Breast ductal carcinoma
								Blood
								Testes
								Epithelium Retinal Pigment
								Blood
								T cell leukemia
								Colon adenocarcinoma
								Macrophage
								BladderEpithelium
								Islet Alpha Cell
								Colon adenocarcinoma
								Skeletal Muscle Cell
								Platelet
								Neuron iPSC
								Dendritic
								Platelet
								Blood
								Epithelium Keratinocyte (Neonatal)
								Placenta
								Dendritic
								SkinEpidermis
								Coronary Endothelial Cell
								Dendritic
								Dendritic
								Plasma
								Testes
								Skin
								Breast adenocarcinoma
								RPE/Choroid
								Hepatocellular carcinoma (HepG2)
								Blood
								Epithelium Retinal Pigment
								Dendritic
								Lung Adenocarcinoma
								Neuroblastoma
								BrainFrontal
								Macrophage
								Macrophage
								Lung squamous carcinoma
								T cell leukemia
								Colon adenocarcinoma
								Retina
								Cervical cancer
								Thyroid
								Biliosphere
								Brain, Prefrontal Cortex
								Brain, Prefrontal Cortex
								Colon adenocarcinoma
								Dendritic
								Lung
								Biliosphere
								Colon adenocarcinoma
								BrainFrontal
								B Cell Centroblast
								Smooth Muscle Cell Bladder
								Skin
								Neuroblastoma
								Colon adenocarcinoma
								Colon adenocarcinoma
								Neural Stem Cell
								Plasma Cell
								Macrophage
								Valve Interstitial Cell
								RPE/Choroid
								Dendritic
								Dendritic
								Lung non-small cell cancer
								Colon adenocarcinoma
								Skin
								Prostate adenocarcinoma
								Neuron iPSC
								Platelet
								Dendritic
								Epithelium Colonic Epithelium (flow)
								Neuron iPSC
								Blood
								Retina
								Placenta
								Cervical cancer
								Neuroblastoma
								CD4+ T Cell
								Neural Stem Cell
								Blood
								Placenta
								Dendritic
								BrainPrefrontalCortex
								Red Blood Cell
								Neural Stem Cell
								BladderEpithelium
								Fibroblast strain
								Platelet
								Nasopharyngeal carcinoma
								Hepatocellular carcinoma (HepG2)
								B Cell_Pre-germinal center
								Lung Adenocarcinoma
								Lung
								Retina
								B Cell_Pre-germinal center
								Dendritic
								Dendritic
								Monocytic leukemia
								Cumulus Oophorus
								Hepatocellular carcinoma (HepG2)
								Adrenal
								Colon adenocarcinoma
								Blood
								Dendritic
								Bladder
								Dendritic
								Islet Beta Cell
								Plasma
								Lung Adenocarcinoma
								Skeletal Muscle Cell
								Red Blood Cell
								Hepatocellular carcinoma
								Retina
								Skin
								Brain, Prefrontal Cortex
								Neuron Dopaminergic
								Corona Radiata
								Platelet
								Blood
								Cervical cancer
								Dendritic
								Neuron iPSC
								Skeletal Muscle Cell
								CD8+ T Cell (Neonatal)
								Bladder
								H9 Differentiated Midbrain
								Placenta
								Colon adenocarcinoma
								Islet Alpha Cell
								SkinDermis
								Myoblast Skeletal Muscle
								Fibroblast Periodonal ligament
								RPE/Choroid
								BrainFrontal
								Skin
								Melanoma
								Skin
								Blood
								Nasopharyngeal carcinoma
								Skin
								T cell leukemia
								SkinDermis
								Brain, Prefrontal Cortex
								Bladder
								SkinDermis
								Nasopharyngeal epithelial cell
								Lung
								Neuron iPSC
								Retina
								Neuron Dopaminergic
								Thyroid
								Bladder
								SkinDermis
								T cell leukemia
								Kidney
								Neuroblastoma
								SkinDermis
								Thyroid
								Colon adenocarcinoma
								Skin
								Colon adenocarcinoma
								Smooth Muscle Cell, Coronary
								Colon adenocarcinoma
								Biliosphere
								Blood
								Cervical cancer
								Brain, Prefrontal Cortex
								Kidney
								Lung Adenocarcinoma
								BladderEpithelium
								CD3+ T Cell Splenic
								Neuron Dopaminergic
								Red Blood Cell
								Embryonic kidney
								Lung
								Retina
								Placenta
								Islet Alpha Cell
								Platelet
								Red Blood Cell
								Blood
								Dendritic
								Platelet
								SkinEpidermis
								Plasma
								Brain, Frontal Cortex
								Astrocytes
								Lung cancer
								Brain, Prefrontal Cortex
								Neuron iPSC
								Brain, Prefrontal Cortex
								Dendritic
								Dendritic
								Melanoma
								Adrenal
								Red Blood Cell
								Lung
								Epididymis
								Retina
								Retina
								Lung Adenocarcinoma
								Lung
								Retina
								Cervical cancer
								Lung Adenocarcinoma
								Colon adenocarcinoma
								Colon adenocarcinoma
								Skin
								Fat
								Bladder
								Biliosphere
								Plasma
								Platelet
								BrainPrefrontalCortex
								Dendritic
								Plasma
								Skin
								Skin
								Placenta
								Plasma
								Hepatocellular carcinoma (HepG2)
								Cervical cancer
								Lung
								B cell lymphoblastoid
								Neuron iPSC
								Hepatocellular carcinoma (HepG2)
								Skin
								Dendritic
								Neuroblastoma
								Lung Adenocarcinoma
								Biliosphere
								Bladder
								Lung
								Retina
								BladderEpithelium
								Dendritic
								Lung Adenocarcinoma
								Retina
								Colon adenocarcinoma
								Testes
								CD4+ T Cell
								Colon adenocarcinoma
								Colon adenocarcinoma
								Plasma
								Bladder
								Red Blood Cell
								Colon
								Lung Adenocarcinoma
								Lung
								Fibroblast strain
								Testes
								Testes
								Testes
								Testes
								Dendritic
								Hepatocellular carcinoma (HepG2)
								Neuron Cortical
								Cervical cancer
								Cervical cancer
								Colon adenocarcinoma
								Dendritic
								Dendritic
								Breast adenocarcinoma
								SkinEpidermis
								Platelet
								Colon adenocarcinoma
								Dendritic
								T cell leukemia
								Skin
								Epithelium Intestinal
								Retina
								Heart
								Skin
								Skin
								Breast adenocarcinoma
								Bladder
								Neuron iPSC
								Cervical cancer
								RPE/Choroid
								Brain, Prefrontal Cortex
								Macrophage
								Skin
								Breast adenocarcinoma
								Retina
								Skin
								Dendritic
								Brain, Prefrontal Cortex
								Biliosphere
								Neuron iPSC
								Breast adenocarcinoma
								Blood
								BladderEpithelium
								B Cell_memory
								Dendritic
								Hepatocellular carcinoma (HepG2)
								Dendritic
								Skin
								Bladder
								Dendritic
								Placenta
								Skin
								Platelet
								Hepatocellular carcinoma (HepG2)
								Retina
								Lung
								Lung squamous carcinoma
								Dendritic
								Skin
								Skin
								Brain, Prefrontal Cortex
								Retina
								Hepatocellular carcinoma (HepG2)
								Retina
								Brain, Prefrontal Cortex
								Neuron Dopaminergic
								Lung
								Skin
								Brain, Cerebellum
								Brain, Cerebellum
								Lung cancer
								Colon adenocarcinoma
								Lung
								Embryonic kidney
								Brain, Prefrontal Cortex
								Brain, Prefrontal Cortex
								Skin
								Platelet
								BrainFrontal
								Plasma
								Dendritic
								Retina
								Biliosphere
								SkinDermis
								CD4+ T Cell
								Breast Epithelium
								Myotube Skeletal Muscle
								BrainPrefrontalCortex
								BladderEpithelium
								Immort. Mammary Epi
								Cervical cancer
								Biliosphere
								Skin
								Skeletal
								Lung
								Cervical cancer
								Colon adenocarcinoma
								Astrocytes
								Skin
								Hepatocellular carcinoma (HepG2)
								Plasma
								Smooth Muscle Cell Bladder
								Lung Adenocarcinoma
								Lung
								Brain, Prefrontal Cortex
								Prostate adenocarcinoma
								Colon adenocarcinoma
								Skin
								Monocytic leukemia
								Cervical cancer
								Retina
								Brain, Frontal Cortex
								Skin
								Myoblast Skeletal Muscle
								Retina
								Blood
								Lung
								Prostate adenocarcinoma
								Epithelium Retinal Pigment
								Lung
								Neuron Dopaminergic
								Mesangial
								Lung
								Nasopharyngeal carcinoma
								BrainFrontal
								Myoblast Skeletal Muscle
								Neuron Dopaminergic
								Placenta
								Epithelium Prostate
								Placenta
								Cervical cancer
								Dendritic
								Biliosphere
								Epithelium Colonic Epithelium (flow)
								Biliosphere
								Epithelium Colonic Epithelium (flow)
								Macrophage
								Colon adenocarcinoma
								Skin
								Skin
								HUVEC
								Smooth Muscle Cell, Coronary
								BrainPrefrontalCortex
								Brain, Prefrontal Cortex
								Brain, Prefrontal Cortex
								Skin
								Skin
								Hepatocellular carcinoma (HepG2)
								Cervical cancer
								Lung
								Plasma
								Breast adenocarcinoma
								T cell leukemia
								Red Blood Cell
								Platelet
								Epithelium Colonic Epithelium (flow)
								Plasma
								Islet Alpha Cell
								Dendritic
								SkinDermis
								Neuron iPSC
								Neuron iPSC
								Dendritic
								BladderEpithelium
								Brain, Prefrontal Cortex
								Lung
								Cervical cancer
								Dendritic
								Epithelium Retinal Pigment
								Brain, Prefrontal Cortex
								Dendritic
								Skin
								Melanocyte
								Brain, Prefrontal Cortex
								Lung Adenocarcinoma
								Brain, Prefrontal Cortex
								BrainPrefrontalCortex
								Lung
								Breast adenocarcinoma
								Immort. Mammary Epi
								BrainPrefrontalCortex
								Bladder
								Bladder
								SkinDermis
								Skin
								BladderEpithelium
								Neuron Dopaminergic
								Islet Beta Cell
								Neuron iPSC
								Embryonic lung fibroblast
								Platelet
								Platelet
								Platelet
								CD3+ T Cell Splenic
								Coronary Endothelial Cell
								Placenta
								Macrophage
								SkinDermis
								Lung Adenocarcinoma
								B Cell Centroblast
								Retina
								Myoblast Skeletal Muscle
								Lung
								SkinDermis
								Lung
								Platelet
								Platelet
								Brain, Prefrontal Cortex
								Dendritic
								Neuron iPSC
								Platelet
								Brain, Prefrontal Cortex
								BladderEpithelium
								Testes
								Brain, Prefrontal Cortex
								Blood
								CD3+ T Cell Splenic
								Skeletal Muscle Cell
								Macrophage
								Kidney
								Neuron iPSC
								Neuron iPSC
								Breast adenocarcinoma
								Islet Beta Cell
								Hepatocellular carcinoma (HepG2)
								Hepatocellular carcinoma (HepG2)
								Brain, Prefrontal Cortex
								Lung
								Fat
								Corona Radiata
								Testes
								Lung squamous carcinoma
								Placenta
								Platelet
								Neuron Dopaminergic
								Coronary Endothelial Cell
								Red Blood Cell
								Skin
								Skin
								Colon adenocarcinoma
								Brain, Prefrontal Cortex
								Dendritic
								Platelet
								Dendritic
								Dendritic
								Epithelium Colonic Epithelium (flow)
								Dendritic
								Platelet
								Neuron iPSC
								Neuron iPSC
								Macrophage
								Blood
								Blood
								Macrophage
								Neuron iPSC
								CD3+ T Cell Splenic
								Smooth Muscle Cell, Coronary
								Cervical cancer
								Dendritic
								Colon adenocarcinoma
								Epithelium Colonic Epithelium (flow)
								Platelet
								Embryonic lung fibroblast
								Dendritic
								Colon adenocarcinoma
								Platelet
								Bladder
								HUVEC
								Biliosphere
								Lung cancer
								Macrophage
								Lung cancer
								Blood
								Macrophage
								Hepatocellular carcinoma (HepG2)
								Brain, Prefrontal Cortex
								Cervical cancer
								Neuron iPSC
								Epithelium Colonic Epithelium (flow)
								Blood
								Blood
								Dendritic
								Skin
								Dendritic
								Skin
								CD4+ T Cell
								Islet Beta Cell
								Smooth Muscle Cell Prostate
								Biliosphere
								Neuron iPSC
								SkinDermis
								Bladder
								Cervical cancer
								Platelet
								Breast adenocarcinoma
								Retina
								Neuron iPSC
								Brain, Prefrontal Cortex
								Colon adenocarcinoma
								Brain, Prefrontal Cortex
								Bladder
								Colon adenocarcinoma
								Platelet
								Platelet
								Placenta
								Breast adenocarcinoma
								Platelet
								Lung
								Dendritic
								Dendritic
								Islet Beta Cell
								Platelet
								Retina
								Platelet
								Placenta
								Neuron iPSC
								Neuron iPSC
								Brain, Prefrontal Cortex
								Cervical cancer
								Biliosphere
								Hepatocellular carcinoma (HepG2)
								T cell leukemia
								Skeletal Muscle Cell
								Neuron Cortical
								Myotube Skeletal Muscle
								Platelet
								SkinDermis
								Macrophage
								Colon adenocarcinoma
								Fat
								Placenta
								BrainPrefrontalCortex
								Colon adenocarcinoma
								Colon adenocarcinoma
								Islet Alpha Cell
								Skin
								Thyroid
								Lung Adenocarcinoma
								BrainPrefrontalCortex
								Breast ductal carcinoma
								T cell leukemia
								Epithelium Keratinocyte (Adult)
								H9 Differentiated Mesenchymal
								CD4+ T Cell
								Kidney
								Platelet
								Platelet
								Platelet
								Neuroblastoma
								Smooth Muscle Cell, Coronary
								Platelet
								Platelet
								Bladder
								BladderEpithelium
								Lung Adenocarcinoma
								Macrophage
								Red Blood Cell
								Retina
								Epithelium Colonic Epithelium (flow)
								Testes
								Lung
								Hepatocellular carcinoma (HepG2)
								Blood
								Plasma
								Retina
								T cell leukemia
								Dendritic
								Skin
								Plasma
								Colon adenocarcinoma
								Lung
								Skin
								Platelet
								Thyroid
								Epithelium Retinal Pigment
								Neuron iPSC
								Epithelium Colonic Epithelium (flow)
								Cervical cancer
								Fat
								Brain, Prefrontal Cortex
								Placenta
								Islet Alpha Cell
								SkinEpidermis
								CD3+ T Cell Splenic
								Lung
								Heart
								Biliosphere
								Blood
								Lung Adenocarcinoma
								Retina
								Retina
								Biliosphere
								Retina
								Endothelial Aortic
								Red Blood Cell
								Myoblast Skeletal Muscle
								H9 Differentiated Midbrain
								Lung Adenocarcinoma
								Immort. Mammary Epi
								Colon adenocarcinoma
								Dendritic
								Islet Alpha Cell
								Brain, Prefrontal Cortex
								Platelet
								Adrenal
								Neuron Dopaminergic
								Kidney
								Fat
								Brain, Prefrontal Cortex
								Cervical cancer
								Dendritic
								Myoblast Skeletal Muscle
								Blood
								Lung
								Adult skin fibroblast
								Lung
								Brain, Prefrontal Cortex
								Bladder
								Osteoblast
								Stromal cell Prostate
								Lung
								Monocyte
								Colon adenocarcinoma
								Skin
								Coronary Endothelial Cell
								T cell leukemia
								Hepatocellular carcinoma (HepG2)
								Retina
								Lung
								Lung Adenocarcinoma
								iPSC-CM
								Breast adenocarcinoma
								Lung Adenocarcinoma
								SkinEpidermis
								Retina
								Lung
								Cervical cancer
								Prostate adenocarcinoma
								Placenta
								Retina
								Breast adenocarcinoma
								CD3+ T Cell Splenic
								Skin
								Colon adenocarcinoma
								CD4+ T Cell
								Biliosphere
								Colon adenocarcinoma
								Myotube Skeletal Muscle
								Breast adenocarcinoma
								T cell leukemia
								Placenta
								BrainPrefrontalCortex
								Plasma Cell
								Smooth Muscle Cell Prostate
								Chondrocyte
								Skeletal Muscle Cell
								Platelet
								Retina
								T cell leukemia
								Plasma
								Dendritic
								Thyroid
								T cell leukemia
								Cervical cancer
								BladderEpithelium
								Bladder
								Retina
								H9 Differentiated Mesenchymal
								Retina
								Retina
								Breast adenocarcinoma
								Bladder
								Monocytic leukemia
								Lung
								Breast adenocarcinoma
								Colon adenocarcinoma
								Lung
								Breast adenocarcinoma
								Nasopharyngeal epithelial cell
								Bladder
								Thyroid
								iPSC-CM
								Adrenal
								BrainFrontal
								Monocytic leukemia
								Macrophage
								Neuroblastoma
								Lung
								Brain, Prefrontal Cortex
								Lung squamous carcinoma
								Colon adenocarcinoma
								Epithelium Colonic Epithelium (flow)
								Plasma
								Epithelium Retinal Pigment
								Retina
								Brain, Prefrontal Cortex
								Lung Adenocarcinoma
								Retina
								Dendritic
								Dendritic
								H9 Differentiated Midbrain
								Macrophage
								Plasma
								Lung
								CD8+ T Cell (Neonatal)
								Hepatocellular carcinoma (HepG2)
								T cell leukemia
								Dendritic
								Dendritic
								Lung
								Breast adenocarcinoma
								BrainPrefrontalCortex
								Adrenal
								Kidney
								SkinEpidermis
								Dendritic
								B cell lymphoblastoid
								Skin
								Osteoblast
								Thyroid
								Breast adenocarcinoma
								Fibroblast strain
								Neuron Cortical
								Lung
								Plasma
								Neuron Dopaminergic
								Skin
								Bladderepithelium
								B Cell Centroblast
								Brain, Prefrontal Cortex
								Colon adenocarcinoma
								Nasopharyngeal epithelial cell
								Placenta
								Fibroblast Aorta Adventitia
								Fibroblast Aorta Adventitia
								CD4+ T Cell
								BrainPrefrontalCortex
								Dendritic
								Lung
								Brain, Prefrontal Cortex
								Lung
								Skin
								Valve Interstitial Cell
								Brain, Prefrontal Cortex
								Heart
								B Cell_Pre-germinal center
								Lung Adenocarcinoma
								Lung Adenocarcinoma
								Epithelium Retinal Pigment
								Skin
								Skin
								Stromal cell Prostate
								CD3+ T Cell Splenic
								Brain, Prefrontal Cortex
								Bladder
								Dendritic
								Dendritic
								Cervical cancer
								Skin
								Brain, Prefrontal Cortex
								Brain, Prefrontal Cortex
								Bladder
								Brain, Prefrontal Cortex
								Lung
								BladderEpithelium
								Blood
								BladderEpithelium
								SkinDermis
								BrainFrontal
								Neuron iPSC
								Retina
								Neuron iPSC
								iPSC-CM
								Retina
								Lung Adenocarcinoma
								Lung Adenocarcinoma
								SkinEpidermis
								T cell leukemia
								Biliosphere
								Lung Adenocarcinoma
								Brain, Prefrontal Cortex
								BrainPrefrontalCortex
								Platelet
								Hepatocellular carcinoma (HepG2)
								Fat
								Fibroblast strain
								Astrocytes
								Hepatocellular carcinoma
								Platelet
								Blood
								Neuron Dopaminergic
								Brain, Prefrontal Cortex
								Biliosphere
								Kidney
								Brain, Prefrontal Cortex
								Brain, Prefrontal Cortex
								Smooth Muscle Cell Prostate
								Hepatocellular carcinoma (HepG2)
								Breast adenocarcinoma
								Platelet
								Lung Adenocarcinoma
								CD8+ T Cell (Neonatal)
								Neuron iPSC
								Breast adenocarcinoma
								Islet Alpha Cell
								Testes
								Skin
								Dendritic
								Brain, Prefrontal Cortex
								Dendritic
								Colon adenocarcinoma
								Myoblast Skeletal Muscle
								Cervical cancer
								Fat
								Testes
								Placenta
								Brain, Prefrontal Cortex
								Retina
								Dendritic
								Platelet
								CD3+ T Cell Splenic
								Brain, Prefrontal Cortex
								Macrophage
								Islet Beta Cell
								Lung Adenocarcinoma
								Lung
								Lung
								Colon adenocarcinoma
								Cervical cancer
								Lung
								BladderEpithelium
								Brain, Prefrontal Cortex
								Islet Alpha Cell
								Thyroid
								Epithelium Retinal Pigment
								Platelet
								Bladder
								Retina
								Melanoma
								Retina
								Testes
								Red Blood Cell
								Lung squamous carcinoma
								Red Blood Cell
								BrainFrontal
								Adrenal
								Retina
								Cervical cancer
								Myoblast Skeletal Muscle
								Thyroid
								Cervical cancer
								Fibroblast Dermal (neonatal)
								Platelet
								Epithelium Colonic Epithelium (flow)
								Plasma
								B cell lymphoblastoid
								Breast adenocarcinoma
								BladderEpithelium
								Retina
[truncated: 10,567 more rows]

## Sheet: Supplemental Table 2
Supplemental Table 2. Cell line characteristics and next generation sequencing information for the NCI-60 renal cell lines used to validate the discovery of previously-unannotated miRNA sequences.
Cell Line	NCI-60 Sequencing ID	Subtype	Cell Type of Origin	Total Reads	Average Coverage (Reads per nucleotide)	Average Quality (Phred Score)	%GC
A498	MX1381-C9C07ANXX-1-ACATCG	Carcinoma	Epithelial	23983341	26.57	33.14	0.4419
CAKI-1	MX1381-C9C07ANXX-1-ATTGGC	Clear cell renal cell carcinoma	Epithelial	20365416	29.39	33.42	0.4453
786-0	MX1381-C9C07ANXX-1-CGTGAT	Renal cell adenocarcinoma	Epithelial	28239458	28.79	33.21	0.4518
TK-10	MX1387-C9C07ANXX-7-TTCTCG	Clear cell renal cell carcinoma	Epithelial	26774556	10.66	31.69	0.4955
UO-31	MX1388-C9C07ANXX-8-TCTGAG	Renal cell carcinoma	Epithelial	12737055	17.82	32.53	0.4542
ACHN	MX1381-C9C07ANXX-1-TGGTCA	Renal cell adenocarcinoma	Epithelial	26253335	29.38	33.4	0.4466
RXF393	MX1386-C9C07ANXX-6-CTTTTG	Renal cell carcinoma	Epithelial	29863988	57.33	34.42	0.4885
SN12C	MX1387-C9C07ANXX-7-TGTTGG	Renal cell carcinoma	Epithelial	23377833	16.45	32.21	0.4557

## Sheet: Supplemental Table 3
Supplemental Table 3. Predicted target-genes of the newly-detected miRNAs differentially expressed in clear cell renal cell carcinoma.
This table lists the output values of the miRanda target prediction algorithm used in to predict the protein-coding genes targeted by previously-undetected miRNAs in kidney samples, as described in the Materials and Methods section.
Novel miRNA ID	Target Gene	Score	Energy	Strand	Novel miRNA Length	Target Length	Positions
Knm2_1407	AAK1	159	-21.44	911196	22	8082	349
Knm22_1790	AAK1	152	-20.78	1129403	23	8082	7118
Knm22_1819	AAK1	150	-22.42	4190728	21	1530	431
Knm5_2934	AAK1	153	-21.28	1784024	20	8082	5214
Knm11_716	ABAT	151	-21.89	5461834	21	3145	2036
Knm16_1165	ABAT	151	-20.53	5680041	22	3145	920
Knm6_2323	ABAT	152	-25.71	1534108	22	3145	641
Knm17_1130	ABC13-47488600E17.1	160	-24.98	867013	20	3068	667
Knm6_2323	ABC13-47488600E17.1	145	-22.06	1739841	22	3068	2001
Knm6_2419	ABC13-47488600E17.1	151	-20.18	2830876	20	3068	3029
Knm11_716	ABCA2	156	-27.08	5539124	21	1970	77
Knm16_1165	ABCA2	157	-25.61	5772060	22	5018	2694
Knm22_1819	ABCA2	154	-21.41	4229882	21	1970	650
Knm1_272	ABCB8	164	-26.28	3130245	20	2013	1242
Knm1_317	ABCB8	151	-21.13	4601310	22	2433	312
Knm1_77	ABCB8	147	-20.27	5966936	22	2013	1780
Knm12_685	ABCB8	142	-21.05	7081799	21	365	164
Knm16_1165	ABCB8	293	-45.23	5692345	22	2433	1716 473
Knm11_716	ABCB9	145	-23.92	5461925	21	919	841
Knm22_2209	ABCB9	143	-20.51	139829	18	1569	127
Knm6_2323	ABCB9	150	-27.58	1580093	22	1696	45
Knm6_2419	ABCB9	161	-31.07	2671128	20	1696	1328
Knm7_2944	ABCB9	329	-53.96	2889335	22	1696	867 1328
Knm1_227	ABCC8	148	-21.83	4492204	22	436	46
Knm16_1165	ABCC8	155	-25.03	5799825	22	1246	12
Knm17_1130	ABCC8	156	-31.45	792112	20	696	14
Knm5_2934	ABCC8	157	-22.61	1872099	20	1246	571
Knm1_272	ABCD4	150	-20.63	3132959	20	689	126
Knm10_427	ABCD4	151	-20.68	6780909	21	1038	302
Knm6_2323	ABCD4	150	-20.13	1614646	22	635	254
Knm16_1165	ABCG4	160	-22.29	5867983	22	1547	825
Knm5_2934	ABCG4	154	-20.46	1940257	20	1547	1060
Knm6_2323	ABCG4	155	-26.71	1722050	22	1547	1298
Knm11_716	ABHD11	163	-21.47	5472514	21	1102	138
Knm17_1130	ABHD11	154	-23.69	743814	20	359	1
Knm6_2419	ABHD11	165	-26.5	2619289	20	465	269
Knm17_1130	ABHD12	153	-21.05	666484	20	647	484
Knm22_1819	ABHD12	149	-22.22	4224103	21	434	131
Knm6_2323	ABHD12	145	-23.4	1607044	22	305	30
Knm11_716	ABHD14B	151	-23.8	5466267	21	915	859
Knm16_1165	ABHD14B	152	-22.87	5751031	22	745	104
Knm17_1130	ABHD14B	153	-29.18	665713	20	915	376
Knm16_1165	ABHD15	160	-22.74	5678190	22	2014	778
Knm2_1407	ABHD15	150	-20.43	877636	22	2014	640
Knm22_1819	ABHD15	157	-25.95	4150741	21	2014	1343
Knm11_716	ABHD2	155	-27.24	5472740	21	6937	481
Knm17_1411	ABHD2	142	-27.15	5036326	21	6937	4876
Knm22_1819	ABHD2	156	-24.27	4163498	21	6937	86
Knm6_2323	ABHD2	152	-23.45	1545014	22	6937	915
Knm1_77	ABHD4	151	-21.17	5940761	22	2267	1484
Knm11_716	ABHD4	163	-25.77	5497448	21	454	345
Knm6_2323	ABHD4	149	-27.41	1576621	22	2267	1355
Knm1_272	ABI2	146	-20.02	3062374	20	20371	19669
Knm1_77	ABI2	166	-24.46	5894987	22	4820	3644
Knm16_1165	ABI2	152	-25.59	5676780	22	4820	3276
Knm18_1200	ABI2	162	-21.22	1312640	21	4820	153
Knm2_1407	ABI2	147	-20.61	880304	22	20371	19507
Knm22_1790	ABI2	147	-20.13	1094433	23	4820	843
Knm6_2419	ABI2	154	-23.72	2621882	20	4820	2372
Knm7_2944	ABI2	148	-24.35	2844167	22	20371	13657
Knm11_716	ABLIM3	161	-28.07	5460156	21	2035	1792
Knm16_1165	ABLIM3	150	-20.4	5678363	22	2035	816
Knm5_2934	ABLIM3	157	-21.89	1750637	20	2035	1218
Knm6_2323	ABLIM3	150	-24.11	1532430	22	2035	608
Knm1_227	AC026369.1	147	-25.43	4572279	22	2058	417
Knm16_1165	AC026369.1	145	-21.93	5881521	22	2058	1481
Knm5_2934	AC026369.1	150	-20.96	1953795	20	2058	1666
Knm6_2419	AC026369.1	154	-21.99	2826623	20	2058	1369
Knm11_716	AC145212.1	320	-59.87	5489578	21	1137	363 353
Knm17_1130	AC145212.1	153	-23.84	689024	20	1137	82
Knm6_2323	AC145212.1	145	-21.14	1561852	22	1137	384
Knm1_317	ACACA	164	-28.75	4779351	22	2020	949
Knm22_1790	ACACA	149	-22.52	1280596	23	2322	1887
Knm3_1968	ACACA	153	-22.66	407768	22	2322	1543
Knm6_2323	ACACA	145	-20.93	1720205	22	499	8
Knm12_685	ACAP3	144	-21.77	6998213	21	417	182
Knm16_1165	ACAP3	162	-23.04	5690390	22	1188	385
Knm6_2323	ACAP3	145	-22.75	1544457	22	1188	961
Knm7_2944	ACAP3	151	-23.9	2853699	22	1188	645
Knm1_317	ACD	165	-32.84	4768733	22	832	800
Knm17_1130	ACD	145	-23.71	841007	20	832	244
Knm17_1411	ACD	142	-22.34	5205147	21	832	95
Knm1_272	ACER3	173	-28.76	3188396	20	6470	4617
Knm10_427	ACER3	155	-22.19	6897915	21	6470	4780
Knm17_1130	ACER3	158	-23.77	783511	20	1773	366
Knm6_2419	ACER3	161	-25.02	2751982	20	6470	3714
Knm11_484	ACHE	151	-29.27	6167874	23	1303	947
Knm12_685	ACHE	152	-23.64	7040702	21	1303	1093
Knm16_1165	ACHE	151	-20.29	5681532	22	963	430
Knm1_272	ACKR2	153	-22.92	3107332	20	1626	107
Knm11_716	ACKR2	145	-21.37	5507609	21	1626	938
Knm16_1165	ACKR2	160	-21.13	5725816	22	1626	974
Knm17_1130	ACKR2	324	-51.92	707055	20	1626	593 1290
Knm11_716	ACOT11	162	-24.24	5467245	21	1215	382
Knm16_1165	ACOT11	158	-23.2	5685452	22	1215	1134
Knm18_1200	ACOT11	156	-24.96	1321312	21	1215	1083
Knm3_1968	ACOT11	165	-24.2	230277	22	1215	933
Knm1_317	ACOX1	149	-20.42	4744422	22	1690	401
Knm1_77	ACOX1	158	-24.1	5896580	22	5241	1230
Knm17_1130	ACOX1	305	-51.33	826783	20	377	109 279
Knm1_317	ACOX3	154	-22.66	4597612	22	679	395
Knm11_716	ACOX3	145	-21.15	5496130	21	409	93
Knm16_1165	ACOX3	153	-20.69	5688647	22	679	421
Knm1_227	ACP6	142	-21.06	4397513	22	638	444
Knm1_317	ACP6	155	-21.92	4760609	22	5188	2501
Knm1_77	ACP6	154	-23.04	6069851	22	5188	3805
Knm1_317	ACSBG1	157	-20.54	4586333	22	3976	1360
Knm11_716	ACSBG1	152	-22.67	5606137	21	2077	1206
Knm22_1790	ACSBG1	146	-26.08	1241034	23	1158	655
Knm11_716	ACSL1	476	-74.71	5567473	21	2073	1774 347 454
Knm22_1790	ACSL1	146	-20.66	1203333	23	2073	1519
Knm22_1819	ACSL1	158	-27.89	4258231	21	2073	800
Knm16_1165	ACTR1B	153	-20.52	5680870	22	895	628
Knm6_2323	ACTR1B	293	-51.51	1534937	22	895	479 84
Knm7_2944	ACTR1B	321	-59.33	2844179	22	895	554 35
Knm22_1790	ACVR1B	162	-28.91	1094572	23	2968	1771
Knm22_1819	ACVR1B	158	-24.4	4149470	21	2968	2070
Knm7_2944	ACVR1B	155	-22.02	2840228	22	2968	120
Knm1_227	ACVR2B	147	-23.04	4380674	22	9810	6888
Knm1_77	ACVR2B	174	-30.11	5908123	22	9810	6882
Knm16_1165	ACVR2B	153	-21.92	5689916	22	9810	489
Knm22_1790	ACVR2B	141	-21.05	1107569	23	9810	2518
Knm5_2934	ACVR2B	156	-23.95	1762190	20	9810	2230
Knm11_716	ADAM11	163	-30.01	5455465	21	2092	954
Knm12_604	ADAM11	150	-23.55	436704	21	2092	921
Knm17_1130	ADAM11	306	-50.42	654911	20	2092	204 261
Knm5_2934	ADAM11	149	-23.52	1745946	20	2092	1228
Knm6_2323	ADAM11	165	-26.96	1527739	22	2092	1363
Knm11_716	ADAM12	155	-21.18	5478908	21	4898	463
Knm2_1407	ADAM12	153	-20.36	896561	22	4898	3386
Knm7_2944	ADAM12	160	-24.02	2860424	22	4898	464
Knm1_77	ADAM19	148	-21.01	6009499	22	1941	1014
Knm12_685	ADAM19	145	-21.08	7100534	21	1941	269
Knm16_1165	ADAM19	155	-23.55	5676021	22	3645	2018
Knm22_1819	ADAM19	154	-22.79	4148572	21	3645	1003
Knm6_2419	ADAM19	148	-22.15	2621123	20	3645	1987
Knm16_1165	ADAM28	145	-21.48	5677447	22	4614	3200
Knm17_1130	ADAM28	145	-21.12	658686	20	4614	4501
Knm5_2934	ADAM28	162	-21.63	1874971	20	1808	878
Knm5_3166	ADAM28	163	-21.99	6389013	21	423	311
Knm6_2323	ADAM28	150	-21.89	1531514	22	4614	1754
Knm7_2944	ADAM28	148	-27.34	2840756	22	4614	3256
Knm16_1165	ADAM33	147	-22.74	5688787	22	989	257
Knm6_2419	ADAM33	157	-26.39	2633889	20	989	934
Knm7_2944	ADAM33	317	-50.38	2852096	22	989	155 65
Knm1_317	ADAMTS15	153	-21.11	4588135	22	2820	1834
Knm12_604	ADAMTS15	159	-22.69	442202	21	2820	2350
Knm6_2323	ADAMTS15	155	-28.34	1533237	22	2820	1120
Knm10_427	ADAMTS2	166	-23.52	6882769	21	1382	129
Knm17_1130	ADAMTS2	150	-28.69	657117	20	3016	1229
Knm5_2934	ADAMTS2	140	-20.66	1748152	20	3016	1053
Knm1_317	ADAMTS4	153	-21.43	4604163	22	6830	3126
Knm12_604	ADAMTS4	146	-21.83	458230	21	6830	11
Knm6_2323	ADAMTS4	151	-25.77	1549265	22	6830	156
Knm11_716	ADAMTSL1	152	-24.15	5484074	21	2402	1473
Knm22_2209	ADAMTSL1	160	-20.67	30482	18	236	25
Knm5_2934	ADAMTSL1	163	-24.58	1777175	20	937	5
Knm1_317	ADAP1	155	-30.54	4586460	22	1018	276
Knm1_77	ADAP1	143	-26.04	5895702	22	1018	62
Knm17_1130	ADAP1	153	-29.31	658734	20	1018	433
Knm18_1200	ADAP1	162	-20.73	1313355	21	1018	647
Knm22_1790	ADAP1	149	-21.77	1095148	23	1018	948
Knm17_1130	ADAP2	154	-29.64	665482	20	1453	173
Knm20_1603	ADAP2	155	-21.64	4811415	22	1453	1049
Knm6_2419	ADAP2	157	-25.39	2629345	20	1453	509
Knm1_77	ADARB1	159	-20.74	5906413	22	4363	1126
Knm17_1130	ADARB1	150	-22.48	669445	20	4363	3541
Knm22_1790	ADARB1	158	-28.74	1105859	23	4363	3507
Knm1_272	ADCK1	155	-21.88	3089937	20	506	467
Knm22_1773	ADCK1	153	-21.38	6581249	20	506	274
Knm6_2419	ADCK1	161	-25.02	2774012	20	331	104
Knm1_317	ADCY1	155	-27.22	4591342	22	9121	8910
Knm5_2934	ADCY1	160	-22.03	1754651	20	9121	251
Knm6_2419	ADCY1	464	-77.79	2627479	20	9121	6488 3120 4102
Knm1_227	ADCY10	157	-24.97	4458314	22	1801	43
Knm17_1130	ADCY10	155	-20.18	740989	20	309	286
Knm22_1819	ADCY10	150	-21.32	4232301	21	309	232
Knm16_1165	ADCY2	151	-22	5686324	22	3210	2403
Knm3_1968	ADCY2	154	-22.29	231149	22	3210	2528
Knm6_2323	ADCY2	148	-21.97	1623916	22	526	323
Knm6_2419	ADCY2	157	-25.39	2631426	20	3210	3176
Knm10_427	ADCY6	158	-21.54	6771838	21	2262	612
Knm12_604	ADCY6	158	-27.66	443835	21	2262	1895
Knm6_2419	ADCY6	153	-20.08	2625905	20	2262	529
Knm1_317	ADCY9	162	-23.36	4587210	22	3124	1489
Knm1_77	ADCY9	152	-27.44	5896452	22	3124	1760
Knm7_2944	ADCY9	328	-59.91	2841554	22	3124	1741 739
Knm1_317	ADD2	156	-24.12	4586158	22	6641	6061
Knm6_2323	ADD2	156	-21.7	1531260	22	6641	481
Knm7_2944	ADD2	151	-20.17	2875373	22	1295	204
Knm11_484	ADGRD1	145	-20.58	6114118	23	1984	306
Knm16_1165	ADGRD1	152	-20.65	5677704	22	1984	811
Knm22_1819	ADGRD1	153	-20.65	4214163	21	2636	317
Knm5_2934	ADGRD1	152	-20.21	1813886	20	2636	26
Knm6_2323	ADGRD1	150	-21.48	1531771	22	1984	660
Knm6_2419	ADGRD1	155	-21.6	2686714	20	2636	60
Knm1_317	ADGRD2	150	-24.47	4596488	22	327	209
Knm11_484	ADGRD2	144	-21.34	6325162	23	586	174
Knm16_1165	ADGRD2	144	-21.38	5862836	22	596	200
Knm22_1790	ADGRD2	152	-23.11	1306401	23	586	318
Knm11_716	ADGRF2	151	-21.81	5487258	21	2917	735
Knm16_1165	ADGRF2	141	-21.47	5705465	22	2917	2612
Knm7_2944	ADGRF2	150	-24.16	2868774	22	2917	105
Knm17_1130	ADGRL3	141	-20.26	764852	20	824	236
Knm3_1968	ADGRL3	164	-26.22	328438	22	824	283
Knm5_2192	ADGRL3	167	-21.04	5354445	22	8166	7737
Knm11_716	AEBP1	145	-22.94	5456345	21	299	159
Knm22_1790	AEBP1	172	-23.9	1135622	23	1972	1602
Knm6_2323	AEBP1	153	-28.32	1575530	22	618	121
Knm1_317	AEBP2	156	-20.61	4695514	22	114	27
Knm17_1130	AEBP2	143	-20.3	689222	20	299	91
Knm22_1819	AEBP2	150	-21.75	4180534	21	299	74
Knm1_77	AFAP1	161	-20.82	5908839	22	5050	475
Knm16_1165	AFAP1	295	-44.55	5690632	22	5050	3237 3170
Knm22_1790	AFAP1	155	-28.73	1108285	23	5050	4007
Knm1_227	AFF2	166	-26.17	4373421	22	9331	1847
Knm16_1165	AFF2	150	-20.5	5682663	22	9331	8668
Knm2_1407	AFF2	153	-21.11	882109	22	9331	7622
Knm17_1130	AFF3	313	-51.32	666424	20	4218	2111 704
Knm3_1987	AFF3	158	-22.17	3503115	22	4218	1854
Knm7_2944	AFF3	163	-29.79	2848494	22	4218	1193
Knm1_317	AGAP1	167	-23.62	4588268	22	7678	3524
Knm16_1165	AGAP1	153	-22.05	5679303	22	7678	84
Knm2_1407	AGAP1	154	-20.69	878749	22	7678	2785
Knm11_716	AGAP2	150	-22.71	5458143	21	2791	411
Knm16_1165	AGAP2	309	-45.61	5676350	22	2791	975 1130
Knm22_1790	AGAP2	146	-20.62	1094003	23	2791	1997
Knm12_604	AGBL1	299	-45.06	633352	21	8861	1676 5586
Knm5_3166	AGBL1	157	-24.91	6524941	21	8861	7159
Knm6_2419	AGBL1	158	-23.55	2815422	20	8861	1182
Knm7_2944	AGBL1	150	-21.51	3033629	22	8861	5219
Knm11_716	AGFG2	148	-22.76	5459837	21	3228	1112
Knm6_2323	AGFG2	142	-20.96	1532111	22	3228	1497
Knm7_2944	AGFG2	157	-25.51	2841353	22	3228	1121
Knm1_317	AGPAT4	150	-21.66	4593029	22	6515	1837
Knm12_685	AGPAT4	147	-22.27	6993306	21	6515	4049
Knm5_2934	AGPAT4	158	-21.51	1756338	20	6515	4270
Knm6_2323	AGPAT4	313	-46.69	1538131	22	6515	4926 1082
Knm1_77	AGPAT5	144	-21.4	6022023	22	254	5
Knm11_716	AGPAT5	147	-20.68	5464076	21	2278	1575
Knm22_1790	AGPAT5	153	-20.32	1220859	23	2255	212
Knm1_77	AHCYL2	161	-20.93	5906027	22	3166	1866
Knm16_1165	AHCYL2	149	-20.28	5687820	22	3166	2698
Knm22_1790	AHCYL2	163	-25.51	1105473	23	3166	1366
Knm5_2192	AHCYL2	165	-21.42	5251406	22	3166	1247
Knm6_2323	AHCYL2	151	-25.72	1541887	22	3166	171
Knm10_427	AHRR	159	-20.64	6778213	21	3457	12
Knm6_2323	AHRR	153	-22.21	1541245	22	3457	51
Knm6_2419	AHRR	150	-22.74	2632280	20	3457	2046
Knm22_1819	AIMP2	150	-20.98	4186786	21	556	76
Knm5_2192	AIMP2	154	-20.55	5237863	22	143	64
Knm7_2944	AIMP2	153	-20.95	2877544	22	556	362
Knm11_484	AIPL1	154	-24.16	6111498	23	1722	1400
Knm22_1790	AIPL1	155	-23.3	1253201	23	1281	735
Knm6_2419	AIPL1	469	-76.87	2644579	20	2750	974 901 878
Knm11_484	AJAP1	326	-56.34	6140308	23	10049	310 436
Knm11_716	AJAP1	150	-22.15	5485687	21	10049	8026
Knm16_1165	AJAP1	147	-20.31	5703894	22	10049	1686
Knm2_1407	AK2	155	-20.65	1016470	22	683	149
Knm22_1819	AK2	146	-21.68	4167645	21	2845	328
Knm6_2419	AK2	166	-20.24	2762126	20	683	8
Knm16_1165	AK4	311	-43.23	5684212	22	5959	2198 2315
Knm3_1968	AK4	154	-20.99	229037	22	5959	4549
Knm5_2934	AK4	154	-20.99	1756486	20	5959	2199
Knm1_317	AK5	147	-22.15	4598766	22	1292	292
Knm17_1130	AK5	166	-29.42	671040	20	1292	97
Knm7_2944	AK5	155	-23.49	2853110	22	1292	491
Knm1_77	AKAP13	153	-21.68	6047814	22	3055	983
Knm22_1819	AKAP13	150	-22.42	4302158	21	3055	710
Knm5_2934	AKAP13	160	-24.62	1780966	20	4681	1772
Knm6_2419	AKAP13	156	-22.53	2653794	20	4681	2267
Knm1_317	AKAP5	153	-21.18	4618168	22	4825	867
Knm17_1130	AKAP5	324	-54.6	690442	20	4825	3583 1548
Knm22_1819	AKAP5	154	-20.12	4181754	21	4825	1690
Knm6_2419	AKAP5	161	-25.02	2654305	20	4825	879
Knm1_77	AKAP8L	146	-22.61	6080348	22	373	87
Knm17_1411	AKAP8L	149	-31.88	5203885	21	752	648
Knm6_2323	AKAP8L	150	-25.75	1712573	22	752	419
Knm11_716	AKNA	152	-21.67	5462532	21	2898	1147
Knm12_604	AKNA	161	-21.68	437124	21	889	777
Knm16_1165	AKNA	158	-24.1	5680739	22	2898	1028
Knm5_2934	AKNA	150	-21.23	1753013	20	2898	2364
Knm11_484	AKT2	154	-25.98	6212628	23	564	89
Knm12_604	AKT2	166	-21.85	462701	21	3555	316
Knm6_2323	AKT2	151	-24.3	1691963	22	374	173
Knm1_227	ALDH1L2	163	-24.01	4508582	22	2112	383
Knm22_1819	ALDH1L2	158	-27.31	4149264	21	4634	3293
Knm5_2934	ALDH1L2	155	-20.47	1748987	20	4634	764
Knm16_1165	ALDH3B1	152	-20.84	5858329	22	171	126
Knm17_1130	ALDH3B1	141	-27.9	665445	20	1337	1177
Knm5_2934	ALDH3B1	140	-20.36	1756480	20	1337	909
Knm6_2323	ALDH3B1	151	-21.93	1721557	22	617	57
Knm1_227	ALDH5A1	146	-20.39	4380113	22	3495	697
Knm11_484	ALDH5A1	162	-27.22	6125769	23	3495	2919
Knm11_716	ALDH5A1	150	-20.16	5471148	21	3495	2266
Knm16_1165	ALDH5A1	160	-27.35	5689355	22	3495	1090
Knm6_2419	ALDH5A1	149	-21.76	2634457	20	3495	2070
Knm12_604	ALDH7A1	155	-22.85	475514	21	3124	589
Knm17_1130	ALDH7A1	159	-27.17	693721	20	3124	2381
Knm22_1773	ALDH7A1	155	-22.7	6585310	20	3124	476
Knm5_2934	ALDH7A1	151	-22.44	1783698	20	144	119
Knm12_604	ALG12	162	-20.02	448673	21	3609	46
Knm22_1790	ALG12	143	-20.44	1193070	23	163	71
Knm6_2323	ALG12	150	-27.83	1539708	22	3609	2437
Knm1_317	ALG13	302	-44.32	4674111	22	3056	2026 1561
Knm16_1165	ALG13	166	-23.5	5774646	22	415	201
Knm17_1130	ALG13	325	-53.32	746385	20	3056	1862 1772
Knm1_272	ALG14	146	-20.02	3079558	20	8669	6635
Knm22_1773	ALG14	149	-20.04	6570870	20	8669	5673
Knm5_2934	ALG14	156	-23.33	1770316	20	8669	1817
Knm6_2419	ALG14	153	-22.81	2643144	20	8669	4962
Knm16_1165	ALG3	165	-25.57	5715985	22	497	463
Knm3_1968	ALG3	174	-31.11	260810	22	497	108
Knm6_2323	ALG3	145	-22.78	1571205	22	1106	783
Knm1_317	ALG9	153	-23.39	4716262	22	3862	1071
Knm12_604	ALG9	154	-21.8	565364	21	419	8
Knm17_1130	ALG9	163	-30.37	852318	20	1633	1305
Knm22_1819	ALG9	165	-25.1	4279848	21	3862	2631
Knm22_2209	ALG9	156	-21.51	197697	18	1633	995
Knm1_227	ALKBH1	161	-20.87	4515457	22	310	56
Knm16_1165	ALKBH1	155	-21.53	5674383	22	1408	435
Knm22_1790	ALKBH1	165	-25.2	1092036	23	1408	439
Knm1_317	ALKBH4	150	-22.8	4676672	22	1249	65
Knm5_2192	ALKBH4	163	-22.3	5245758	22	1156	702
Knm6_2419	ALKBH4	153	-22.53	2712809	20	1249	1204
Knm1_317	ALPI	146	-21.44	4659891	22	1654	745
Knm1_77	ALPI	152	-22.01	5897379	22	886	44
Knm11_484	ALPI	156	-20.68	6115586	23	886	60
Knm22_1773	ALPI	172	-27.41	6552000	20	886	91
Knm6_2323	ALPI	153	-22.11	1533239	22	886	30
Knm7_2944	ALPI	163	-24.71	2842481	22	886	740
Knm22_1790	ALPK1	157	-22.39	1209570	23	3339	1466
Knm22_1819	ALPK1	144	-21.57	4220912	21	1396	792
Knm22_2209	ALPK1	153	-20.01	118535	18	3339	283
Knm11_716	ALPK3	296	-43.31	5458254	21	5026	896 4746
Knm22_1819	ALPK3	159	-21.33	4149012	21	5026	4151
Knm7_2944	ALPK3	305	-53	2839770	22	5026	571 3737
Knm18_1200	ALX4	164	-25.68	1323864	21	4410	435
Knm6_2419	ALX4	149	-20.15	2633106	20	4410	568
Knm7_2944	ALX4	298	-42.62	2851313	22	4410	1190 453
Knm17_1130	AMDHD2	150	-21.25	812971	20	553	128
Knm22_1790	AMDHD2	160	-27.49	1249385	23	553	168
Knm5_2934	AMDHD2	141	-22.87	1751863	20	1859	1053
Knm16_1165	AMER3	156	-20.09	5719760	22	3476	2342
Knm22_1790	AMER3	165	-25.68	1105688	23	428	112
Knm6_2323	AMER3	158	-24	1573827	22	3476	3369
Knm17_1130	AMIGO1	291	-42.09	678758	20	3256	2863 1182
Knm5_3166	AMIGO1	160	-22.54	6352140	21	3256	2442
Knm6_2323	AMIGO1	152	-22.09	1551586	22	3256	596
Knm16_1165	ANAPC11	140	-21.79	5689627	22	468	399
Knm22_1790	ANAPC11	154	-21.47	1107280	23	468	350
Knm5_2934	ANAPC11	165	-25.84	1912691	20	926	595
Knm11_716	ANGPT4	153	-20.57	5486414	21	3061	1
Knm16_1165	ANGPT4	145	-21.08	5704621	22	3061	3000
Knm6_2323	ANGPT4	168	-26.07	1558688	22	3061	1495
Knm7_2944	ANGPT4	155	-23.45	2867930	22	3061	801
Knm1_77	ANK2	144	-20.84	5910091	22	2269	786
Knm22_2209	ANK2	159	-22.85	18502	18	2269	905
Knm6_2323	ANK2	144	-21.87	1721562	22	5493	1872
Knm11_716	ANKH	149	-25.36	5558673	21	1206	556
Knm5_2934	ANKH	154	-20.56	1751796	20	6393	1051
Knm6_2419	ANKH	165	-26.85	2624624	20	6393	6121
Knm1_272	ANKRD11	172	-27.47	3066299	20	7925	1733
Knm16_1165	ANKRD11	156	-22.91	5684783	22	7925	1337
Knm6_2419	ANKRD11	297	-43.78	2625420	20	848	535 647
Knm1_77	ANKRD13B	156	-25.91	5925205	22	1179	285
Knm10_427	ANKRD13B	163	-21.99	6798033	21	1179	255
Knm16_1165	ANKRD13B	158	-26.45	5706998	22	1179	706
Knm17_1130	ANKRD13B	147	-25	688237	20	1179	936
Knm22_1790	ANKRD13B	155	-23.82	1270943	23	156	125
Knm1_317	ANKRD16	163	-27.52	4612940	22	1108	831
Knm11_484	ANKRD16	149	-20.44	6140389	23	1108	133
Knm6_2323	ANKRD16	159	-20.48	1558042	22	1108	341
Knm6_2419	ANKRD16	161	-26.02	2649077	20	1108	773
Knm1_317	ANKRD39	146	-27.31	4642341	22	4386	1855
Knm17_1130	ANKRD39	158	-25.48	714615	20	4386	3276
Knm18_1200	ANKRD39	160	-25.54	1369236	21	4386	717
Knm22_2209	ANKRD39	159	-22.26	59994	18	4386	446
Knm18_1200	ANKRD46	164	-23.35	1436698	21	825	324
Knm5_2934	ANKRD46	144	-20.89	1873112	20	825	750
Knm6_2323	ANKRD46	159	-22.42	1654905	22	825	168
Knm1_77	ANKRD52	147	-23.61	5897248	22	5335	3444
Knm12_604	ANKRD52	163	-22.76	442073	21	5335	2295
Knm6_2323	ANKRD52	145	-25.85	1533108	22	5335	801
Knm6_2419	ANKRD52	153	-21.21	2624143	20	5335	2761
Knm10_427	ANKRD9	150	-22.94	6772384	21	5176	2270
Knm12_604	ANKRD9	151	-21.41	444381	21	5176	150
Knm6_2323	ANKRD9	152	-20.39	1535416	22	5176	978
Knm6_2419	ANKRD9	319	-51.83	2626451	20	5176	3602 1457
Knm7_2944	ANKRD9	147	-31.67	2844658	22	5176	945
Knm18_1200	ANKS3	160	-24.01	1481047	21	1822	756
Knm22_1819	ANKS3	145	-21.22	4322016	21	1854	906
Knm6_2323	ANKS3	161	-27.76	1536409	22	396	239
Knm1_317	ANPEP	144	-20.03	4587162	22	460	140
Knm10_427	ANPEP	157	-20.76	6769232	21	460	390
Knm6_2323	ANPEP	153	-26.95	1532264	22	460	241
Knm1_227	ANTXR2	154	-25.61	4399929	22	6280	1321
Knm10_427	ANTXR2	165	-20.94	6800206	21	6280	2433
Knm11_716	ANTXR2	147	-20.78	5490964	21	6280	737
Knm17_1130	ANTXR2	152	-31.62	721675	20	1243	422
Knm11_716	ANXA11	309	-51.17	5476907	21	4964	2770 1051
Knm12_604	ANXA11	168	-20.51	439321	21	729	388
Knm6_2323	ANXA11	305	-49.46	1549181	22	4964	753 4313
Knm6_2419	ANXA11	314	-46.53	2640216	20	4964	3117 1865
Knm1_77	AP1B1	152	-20.98	5904813	22	956	111
Knm22_2209	AP1B1	156	-22.68	13224	18	956	672
Knm6_2419	AP1B1	147	-23.13	2631708	20	956	257
Knm7_2944	AP1B1	300	-46.91	2849915	22	956	636 252
Knm22_1773	AP1G1	153	-20.4	6555328	20	4058	1071
Knm22_1790	AP1G1	163	-25.02	1100153	23	4058	2578
Knm6_2323	AP1G1	152	-24.99	1687810	22	765	388
Knm6_2419	AP1G1	153	-20.28	2627602	20	4058	2185
Knm12_604	AP2B1	162	-21.23	635207	21	3140	402
Knm22_2209	AP2B1	153	-20.49	201005	18	2710	1165
Knm5_2934	AP2B1	154	-23.32	1946661	20	2710	2329
Knm6_2323	AP2B1	314	-45	1728454	22	2710	1607 2381
Knm5_2192	AP3S2	166	-21.72	5247665	22	4916	529
Knm5_2934	AP3S2	156	-23.12	1756353	20	4916	2046
Knm7_2944	AP3S2	168	-27.46	2847388	22	4916	2350
Knm22_1819	AP4M1	159	-21.33	4181179	21	452	382
Knm6_2323	AP4M1	152	-26.28	1572707	22	2828	2029
Knm6_2419	AP4M1	153	-23.58	2653730	20	452	65
Knm1_272	AP4S1	164	-23.32	3197524	20	3415	353
Knm1_317	AP4S1	154	-24.3	4724973	22	3415	2660
Knm22_1790	AP4S1	314	-48.99	1233661	23	3415	905 2758
Knm22_1819	AP4S1	150	-21.28	4288559	21	3415	625
Knm6_2419	AP4S1	158	-21.63	2618845	20	1568	858
Knm22_1819	AP5B1	159	-26.33	4281720	21	1963	1501
Knm6_2419	AP5B1	161	-28.06	2754271	20	1963	1915
Knm7_2944	AP5B1	330	-54.95	2972478	22	1963	371 257
Knm1_272	APBA1	158	-20.16	3057635	20	3797	2061
Knm22_1790	APBA1	153	-23.29	1093772	23	3797	2130
Knm3_1987	APBA1	154	-20.94	3494049	22	3797	2252
Knm6_2323	APBA1	145	-26.31	1530186	22	3797	1821
Knm6_2419	APBA1	305	-41.06	2621221	20	3797	2737 3153
Knm2_1407	APBB2	147	-20.21	879248	22	6065	4069
Knm22_1790	APBB2	159	-23.97	1097455	23	6065	3429
Knm22_2209	APBB2	160	-22.74	6420	18	6065	555
Knm11_716	APEH	160	-26.24	5520829	21	793	688
Knm16_1165	APEH	161	-24.59	5752776	22	686	334
Knm22_1819	APEH	157	-24	4225327	21	686	618
Knm5_2934	APEH	155	-20.04	1752000	20	621	340
Knm6_2419	APEH	169	-24.83	2624828	20	621	145
Knm17_1130	APIP	302	-42.09	792303	20	3823	1238 2739
Knm6_2419	APIP	153	-21.47	2756166	20	3823	85
Knm7_2944	APIP	150	-22.79	2974373	22	3823	85
Knm16_1165	APOBR	160	-26.28	5720921	22	465	60
Knm17_1130	APOBR	141	-23.12	702160	20	465	216
Knm6_2323	APOBR	173	-34.26	1574988	22	465	233
Knm1_227	APOL3	162	-21.1	4501115	22	412	136
Knm22_1790	APOL3	155	-26.48	1124203	23	1882	820
Knm7_2944	APOL3	168	-26.59	2869859	22	1882	691
Knm16_1165	APOL4	170	-23.35	5691495	22	1946	860
Knm20_1603	APOL4	163	-21.6	4811411	22	278	181
Knm22_1819	APOL4	150	-20.84	4248532	21	260	160
Knm6_2323	APOL4	160	-25.91	1545562	22	1946	1893
Knm12_604	APOL6	152	-20.99	478199	21	8813	3119
Knm17_1130	APOL6	156	-22.63	696406	20	8813	6750
Knm22_1819	APOL6	150	-20.78	4187718	21	8813	386
Knm6_2419	APOL6	166	-28.52	2660269	20	8813	487
Knm7_2944	APOL6	150	-20.07	2878476	22	8813	484
Knm1_77	AQP12B	141	-20.5	5930104	22	2818	1389
Knm22_1790	AQP12B	158	-21.79	1156448	23	475	298
Knm6_2323	AQP12B	154	-24.25	1565964	22	2818	209
Knm22_1773	AQP7	155	-21.33	6572736	20	1826	411
Knm6_2323	AQP7	146	-25.29	1553975	22	1826	156
Knm6_2419	AQP7	145	-20.8	2645010	20	1826	1178
Knm12_604	AR	143	-20.27	468340	21	6901	64
Knm16_1165	AR	162	-20.26	5777512	22	1353	139
Knm6_2323	AR	173	-35.22	1550175	22	6778	1981
Knm11_716	AREL1	167	-29.43	5604883	21	472	249
Knm16_1165	AREL1	145	-20.67	5692547	22	2468	356
Knm22_1819	AREL1	308	-47.51	4165098	21	2468	1508 1557
Knm1_317	ARF3	157	-23.15	4584983	22	3224	634
Knm10_427	ARF3	162	-21.43	6767053	21	3224	2345
Knm5_2934	ARF3	158	-26.59	1748292	20	3224	1999
Knm1_227	ARFIP2	150	-28.17	4368692	22	1433	692
Knm11_484	ARFIP2	146	-22.83	6114348	23	1433	583
Knm17_1130	ARFIP2	149	-20.19	847742	20	2430	2000
Knm6_2323	ARFIP2	157	-21.39	1532001	22	1433	173
Knm12_604	ARFRP1	145	-25	618706	21	1801	250
Knm5_2934	ARFRP1	158	-24.29	1927948	20	1801	934
Knm6_2323	ARFRP1	156	-21.56	1709741	22	1801	416
Knm22_1819	ARHGAP1	158	-22.06	4154870	21	1957	1284
Knm6_2323	ARHGAP1	164	-24.48	1536386	22	1957	451
Knm7_2944	ARHGAP1	157	-25.26	2845628	22	1957	1527
Knm11_716	ARHGAP19	163	-25.06	5473813	21	3949	1227
Knm22_1790	ARHGAP19	163	-28.36	1193107	23	4623	157
Knm22_2209	ARHGAP19	156	-20.67	18638	18	3949	1548
Knm3_1968	ARHGAP19	156	-21.38	320279	22	4623	518
Knm11_484	ARHGAP22	290	-48.26	6183530	23	1110	717 910
Knm17_1130	ARHGAP22	146	-21.81	728355	20	1110	238
Knm5_2934	ARHGAP22	140	-21.45	1819390	20	1110	349
Knm1_227	ARHGAP26	141	-22.8	4370150	22	4039	1797
Knm10_427	ARHGAP26	158	-20.44	6808136	21	748	491
Knm22_1819	ARHGAP26	153	-22.49	4197009	21	320	148
Knm6_2419	ARHGAP26	157	-29.4	2624494	20	4039	4002
Knm7_2944	ARHGAP26	154	-21.8	2842701	22	4039	4002
Knm22_1819	ARHGAP27	151	-20.39	4172194	21	1547	769
Knm5_2934	ARHGAP27	143	-21.67	1771917	20	1547	1140
Knm6_2323	ARHGAP27	147	-23.88	1553710	22	1547	1367
Knm16_1165	ARHGAP32	160	-21.43	5679444	22	3847	1374
Knm2_1407	ARHGAP32	153	-20.98	878890	22	3847	1921
Knm7_2944	ARHGAP32	468	-71.45	2968002	22	5329	4416 3479 95
Knm11_484	ARHGAP35	147	-23.86	6145279	23	4389	2703
Knm16_1165	ARHGAP35	147	-23.43	5708865	22	4389	1628
Knm6_2419	ARHGAP35	141	-20.09	2653967	20	4389	318
Knm1_77	ARHGEF18	157	-26.04	5905700	22	1958	1301
Knm22_1819	ARHGEF18	145	-26.06	4160044	21	1958	1352
Knm5_2934	ARHGEF18	145	-20.53	1759767	20	1958	1706
Knm6_2419	ARHGEF18	141	-21.11	2632595	20	1958	302
Knm7_2944	ARHGEF18	154	-23.18	2850802	22	1958	1266
Knm1_272	ARHGEF3	151	-20.56	3131444	20	1984	479
Knm1_317	ARHGEF3	159	-20.61	4587079	22	1852	106
Knm11_716	ARHGEF3	167	-23.96	5459907	21	1852	999
Knm11_716	ARHGEF39	151	-25.47	5482679	21	2643	1214
Knm6_2323	ARHGEF39	154	-20.17	1554953	22	2643	2378
Knm6_2419	ARHGEF39	157	-25.39	2645988	20	2643	2092
Knm11_716	ARHGEF40	157	-28.18	5605815	21	3261	266
Knm6_2323	ARHGEF40	162	-24.36	1533641	22	1232	134
Knm7_2944	ARHGEF40	301	-55.6	2987331	22	3261	883 262
Knm1_317	ARHGEF9	158	-21.7	4793137	22	3488	976
Knm11_484	ARHGEF9	154	-29.04	6320885	23	1430	92
Knm12_604	ARHGEF9	149	-20.11	438241	21	3061	2267
Knm22_1790	ARHGEF9	151	-24.6	1092862	23	3061	1898
Knm22_1819	ARHGEF9	147	-20.77	4356723	21	3488	1745
Knm7_2944	ARHGEF9	152	-20.48	2838518	22	3061	1141
Knm1_227	ARID1A	158	-27.45	4441834	22	2265	1252
Knm22_1773	ARID1A	152	-20.33	6623904	20	2265	1181
Knm6_2419	ARID1A	152	-22.7	2696178	20	2265	810
Knm1_317	ARID1B	153	-21.18	4795678	22	8292	1006
Knm16_1165	ARID1B	140	-21.61	5889779	22	4321	1400
Knm22_2209	ARID1B	167	-22.21	216397	18	4321	946
Knm1_227	ARID2	158	-24.51	4376137	22	2962	1510
Knm17_1130	ARID2	161	-28.29	666618	20	2962	2321
Knm7_2944	ARID2	150	-22.91	2848688	22	2962	2094
Knm11_716	ARIH2	160	-29.06	5471639	21	3112	1223
Knm16_1165	ARIH2	152	-22.41	5689846	22	3112	2495
Knm17_1130	ARIH2	144	-20.93	671085	20	3112	440
Knm6_2323	ARIH2	149	-23.03	1595987	22	1616	393
Knm6_2419	ARIH2	147	-23.56	2634948	20	3112	352
Knm1_272	ARL10	150	-20.01	3060855	20	10014	9142
Knm22_1790	ARL10	294	-41.38	1096992	23	10014	8998 9133
Knm22_1819	ARL10	468	-70.12	4151890	21	10014	2423 7488 869
Knm6_2419	ARL10	161	-25.02	2624441	20	10014	6965
Knm1_317	ARL17A	159	-25.4	4593793	22	3312	1445
Knm17_1130	ARL17A	173	-33.98	666067	20	3312	27
Knm22_1790	ARL17A	155	-24.14	1102481	23	3312	2561
Knm11_716	ARL2-SNX15	151	-20.57	5461617	21	2024	89
Knm22_1819	ARL2-SNX15	150	-22.28	4152375	21	2024	1671
Knm6_2419	ARL2-SNX15	169	-26.89	2624926	20	2024	1022
Knm1_77	ARL3	153	-20.57	5895416	22	3163	31
Knm11_716	ARL3	173	-29.6	5459002	21	3163	1316
Knm3_1975	ARL3	176	-20.57	3931553	23	3163	1898
Knm3_2261	ARL3	181	-20.87	3713346	24	3163	1898
Knm6_2323	ARL3	157	-23.53	1531276	22	3163	2338
Knm11_484	ARMC5	153	-22.16	6181326	23	1965	1151
Knm22_1819	ARMC5	159	-23.67	4217463	21	1965	470
Knm6_2323	ARMC5	140	-21.18	1696477	22	554	292
Knm7_2944	ARMC5	152	-20.23	2844193	22	275	198
Knm1_77	ARMC7	165	-26.49	5892964	22	1227	34
Knm6_2323	ARMC7	155	-25.89	1701159	22	353	159
Knm6_2419	ARMC7	161	-22.91	2798954	20	644	95
Knm1_77	ARMC8	163	-25.51	5976766	22	299	166
Knm17_1130	ARMC8	153	-23.56	728097	20	362	18
Knm6_2419	ARMC8	151	-21.94	2693708	20	2497	752
Knm7_2944	ARMC8	160	-20.89	2911915	22	2497	752
Knm1_272	ARMCX4	152	-20.56	3071617	20	2525	1917
Knm1_317	ARMCX4	153	-23.03	4599066	22	2525	1550
Knm7_2944	ARMCX4	151	-21.05	2894317	22	3830	2898
Knm21_2196	ARNT2	161	-23.38	3281649	18	4239	3535
Knm5_3166	ARNT2	154	-20.94	6336547	21	4239	2616
Knm6_2323	ARNT2	314	-45.18	1535993	22	4239	2376 2100
Knm11_716	ARPIN	159	-24.25	5472273	21	6789	1551
Knm17_1130	ARPIN	317	-53.71	734422	20	920	338 702
Knm22_1790	ARPIN	155	-21.92	1108133	23	6789	2870
Knm6_2323	ARPIN	148	-21.63	1544547	22	6789	2853
Knm12_604	ASAH1	150	-20.45	647570	21	1486	631
Knm17_1130	ASAH1	153	-24.95	657525	20	1118	290
Knm6_2323	ASAH1	157	-21.7	1738047	22	2052	909
Knm22_1819	ASAP3	145	-24.21	4229721	21	442	236
Knm3_1987	ASAP3	163	-20.18	3584995	22	2838	1714
Knm5_2934	ASAP3	300	-42.24	1839339	20	2838	1622 1870
Knm6_2419	ASAP3	151	-23.81	2712167	20	2838	1910
Knm7_2512	ASAP3	149	-21.17	2275753	20	2838	65
Knm11_716	ASB1	303	-44.76	5458098	21	5739	3682 1360
Knm6_2323	ASB1	150	-21.15	1530372	22	5739	4932
Knm7_2944	ASB1	151	-20.23	2839614	22	5739	1097
Knm12_604	ASB13	155	-24.52	454815	21	1835	1236
Knm17_1130	ASB13	157	-21.36	673022	20	1835	421
Knm22_1819	ASB13	153	-20.81	4225817	21	2231	133
Knm11_716	ASB2	150	-20.51	5469783	21	490	158
Knm16_1165	ASB2	152	-23.77	5687990	22	490	97
Knm7_2944	ASB2	155	-31.61	2851299	22	490	306
Knm1_77	ASB8	150	-22.83	5903080	22	1578	1002
Knm11_716	ASB8	161	-27.48	5593024	21	500	473
Knm5_2934	ASB8	151	-20.05	1885922	20	256	50
Knm6_2419	ASB8	157	-20.9	2756333	20	500	419
Knm2_1407	ASH1L	163	-24.95	1018388	22	1057	604
Knm22_1790	ASH1L	153	-21.95	1114950	23	2392	330
Knm5_2934	ASH1L	150	-20.66	1769571	20	2392	1029
Knm16_1165	ASIC1	162	-21.47	5674201	22	1962	1015
Knm22_1790	ASIC1	142	-21.57	1237798	23	2839	1
Knm6_2323	ASIC1	163	-26.54	1528268	22	1962	67
Knm1_317	ASIC4	148	-20.75	4598242	22	726	659
Knm16_1165	ASIC4	158	-22.87	5689277	22	726	651
Knm6_2323	ASIC4	150	-24.26	1543344	22	726	121
Knm17_1130	ASPA	155	-24.2	820154	20	277	77
Knm22_1819	ASPA	312	-42.34	4150397	21	4331	1632 3595
Knm6_2419	ASPA	148	-21.36	2622948	20	4331	2622
Knm7_3340	ASPA	166	-23.53	1968327	21	4331	3305
Knm16_1165	ASPG	146	-20.56	5818817	22	3037	1003
Knm2_1407	ASPG	166	-20.34	1018263	22	3037	2665
Knm5_2934	ASPG	160	-27.12	1891091	20	3037	1514
Knm1_77	ASPH	167	-25.93	6014211	22	5779	5378
Knm10_427	ASPH	146	-20.26	6887039	21	5779	3712
Knm6_2419	ASPH	156	-23.17	2633374	20	2563	959
Knm1_317	ASPSCR1	166	-26.77	4601900	22	819	278
Knm17_1130	ASPSCR1	147	-22.41	663924	20	84	31
Knm3_1968	ASPSCR1	163	-23.1	237760	22	819	476
Knm6_2323	ASPSCR1	149	-20.29	1547002	22	819	319
Knm22_1773	ASXL1	155	-21.92	6552294	20	1980	761
Knm22_1819	ASXL1	158	-26.37	4152017	21	1980	500
Knm5_2934	ASXL1	166	-26.59	1751740	20	1980	1835
Knm1_272	ASXL2	152	-20.15	3067773	20	4337	1879
Knm11_716	ASXL2	158	-26.95	5468050	21	4337	3472
Knm2_1407	ASXL2	164	-20.59	885703	22	4337	392
Knm22_1790	ASXL2	164	-27.59	1103910	23	4337	1122
Knm1_77	ASXL3	155	-22.57	5897054	22	4597	554
Knm11_484	ASXL3	151	-22.69	6280963	23	2837	2308
Knm12_604	ASXL3	149	-23.95	441879	21	4597	3188
Knm21_2146	ASXL3	154	-22.09	2405742	19	4597	1238
Knm11_716	ATF7	147	-21.76	5501578	21	5078	1608
Knm16_1165	ATF7	157	-21.35	5738416	22	3695	862
Knm6_2323	ATF7	141	-21.3	1573852	22	5078	5004
Knm17_1130	ATF7IP2	153	-20.16	793946	20	408	138
Knm20_1603	ATF7IP2	169	-21.1	4810660	22	1738	256
Knm22_1819	ATF7IP2	150	-22.03	4156039	21	1738	1029
Knm11_716	ATG10	168	-29.39	5471791	21	766	304
Knm6_2419	ATG10	157	-29.4	2624398	20	2076	463
Knm7_2944	ATG10	154	-21.8	2842605	22	2076	463
Knm1_272	ATG2B	150	-20.24	3073605	20	6553	3742
Knm1_77	ATG2B	156	-21.23	5910296	22	6553	39
Knm5_2934	ATG2B	153	-20.03	1764363	20	6553	4678
Knm7_2512	ATG2B	154	-20.08	2200777	20	6553	526
Knm1_77	ATG4B	159	-22.53	5907506	22	1336	262
Knm11_716	ATG4B	150	-27	5487487	21	1593	1213
Knm17_1130	ATG4B	154	-25.21	670538	20	1336	12
Knm6_2323	ATG4B	156	-26.2	1543366	22	1336	846
Knm1_317	ATG4D	157	-23.94	4590782	22	351	116
Knm16_1165	ATG4D	158	-25.41	5844595	22	376	296
Knm6_2419	ATG4D	160	-24.55	2626919	20	351	150
Knm7_2944	ATG4D	157	-22.97	2845126	22	351	149
Knm16_1165	ATIC	157	-20.66	5731148	22	1984	1764
Knm3_1968	ATIC	155	-26.71	267695	22	901	119
Knm5_2934	ATIC	152	-20.83	1803422	20	1984	1703
Knm12_604	ATL3	159	-21.23	471603	21	5232	35
Knm17_1130	ATL3	168	-26.88	689810	20	5232	2995
Knm22_1790	ATL3	142	-20.11	1126224	23	5232	2634
Knm22_1819	ATL3	150	-22.03	4181122	21	5232	3136
Knm3_1987	ATL3	158	-20.5	3526501	22	5232	3382
Knm22_1773	ATM	160	-21.39	6553407	20	3591	2097
Knm6_2419	ATM	157	-24.83	2625681	20	3591	2748
Knm7_2944	ATM	150	-25.08	2975426	22	689	189
Knm1_77	ATP10A	151	-23.05	5909899	22	2068	1294
Knm11_484	ATP10A	158	-20.79	6265423	23	4782	1374
Knm17_1130	ATP10A	147	-25.96	672931	20	2068	1676
Knm22_1819	ATP10A	161	-24.99	4301560	21	4782	56
Knm5_2934	ATP10A	149	-20.01	1763966	20	2068	1533
Knm3_1968	ATP10B	170	-34.72	229844	22	2333	728
Knm3_1987	ATP10B	162	-21.11	3502949	22	2333	304
Knm7_2512	ATP10B	161	-21.35	2193707	20	2333	1746
Knm17_1130	ATP12A	154	-24.02	680147	20	971	599
Knm22_1790	ATP12A	154	-25.32	1116561	23	971	302
Knm22_1819	ATP12A	154	-20.89	4171459	21	971	516
Knm1_317	ATP13A4	151	-28.48	4647957	22	3336	1916
Knm12_604	ATP13A4	156	-20.66	502024	21	3336	1481
Knm17_1130	ATP13A4	158	-22.85	702014	20	1326	54
Knm6_2323	ATP13A4	142	-20.22	1593059	22	3336	424
Knm16_1165	ATP1B2	149	-21.73	5675601	22	1873	57
Knm22_1790	ATP1B2	149	-20.16	1093254	23	1873	889
Knm22_1819	ATP1B2	150	-22.14	4148152	21	1873	1001
Knm12_604	ATP1B4	148	-21.87	577391	21	3615	3512
Knm17_1130	ATP1B4	168	-26.88	655586	20	2737	1890
Knm2_1407	ATP1B4	159	-21.75	1013805	22	3615	3200
Knm22_1819	ATP1B4	150	-22.28	4146898	21	2737	2031
Knm1_77	ATP2A3	162	-30.04	5896150	22	1563	763
Knm16_1165	ATP2A3	155	-20.55	5677943	22	1563	1359
Knm5_2192	ATP2A3	175	-22.75	5241529	22	1563	783
Knm7_3340	ATP2A3	164	-21.87	1968424	21	1563	203
Knm1_77	ATP2B1	147	-21.52	5895382	22	2933	254
Knm17_1130	ATP2B1	152	-20.45	658414	20	2933	1561
Knm7_3340	ATP2B1	168	-24.3	1967656	21	2933	2364
Knm1_227	ATP5S	172	-22.62	4373651	22	9184	6439
Knm22_1819	ATP5S	142	-20.23	4155444	21	9184	2685
Knm6_2323	ATP5S	155	-23.05	1536960	22	9184	6951
Knm6_2419	ATP5S	157	-25.39	2620580	20	595	565
Knm1_77	ATP6AP1	147	-21.29	5957667	22	4115	2679
Knm16_1165	ATP6AP1	171	-28.79	5695373	22	625	120
Knm2_1407	ATP6AP1	155	-23.72	938906	22	4115	934
Knm6_2323	ATP6AP1	316	-50.59	1593527	22	4115	2326 2430
Knm1_317	ATP6V0A1	155	-23.59	4584974	22	1462	270
Knm5_2934	ATP6V0A1	160	-29.58	1748283	20	1462	716
Knm6_2323	ATP6V0A1	145	-26.07	1530076	22	1462	1308
Knm1_272	ATP7B	154	-21.89	3267308	20	2200	1913
Knm11_716	ATP7B	164	-24.23	5667585	21	2200	1317
Knm7_2944	ATP7B	160	-26.87	2838731	22	2083	803
Knm1_317	ATP8A1	152	-21.5	4586515	22	4539	1868
Knm17_1130	ATP8A1	154	-26.16	658789	20	4539	2836
Knm6_2323	ATP8A1	159	-28.99	1632665	22	493	65
Knm7_2512	ATP8A1	161	-21.35	2303523	20	5690	1013
Knm17_1130	ATP8B2	317	-52.77	677183	20	2189	1029 1183
Knm18_1200	ATP8B2	157	-23.67	1331804	21	2189	889
Knm6_2323	ATP8B2	160	-22.89	1550011	22	2189	297
Knm11_484	ATP8B3	150	-29.58	6243103	23	4737	3553
Knm16_1165	ATP8B3	153	-22.66	5806689	22	4737	3427
Knm22_1819	ATP8B3	157	-24.24	4279240	21	4737	3409
Knm6_2419	ATP8B3	151	-20.85	2751791	20	4737	249
Knm1_227	ATP9A	159	-20.46	4373453	22	4697	327
Knm1_77	ATP9A	146	-20.31	5900902	22	4697	166
Knm17_1130	ATP9A	153	-23.35	663934	20	4697	705
Knm1_272	ATRX	152	-20.25	3141989	20	9745	5736
Knm1_317	ATRX	155	-20.76	4669438	22	9745	2044
Knm3_1968	ATRX	152	-20.33	305298	22	9745	1558
Knm6_2323	ATRX	156	-29.28	1633124	22	2085	909
Knm16_1165	ATXN1	162	-20.75	5674830	22	7217	421
Knm22_1790	ATXN1	158	-28.61	1092483	23	7217	225
Knm7_2944	ATXN1	156	-26.43	2838139	22	7217	6628
Knm10_427	ATXN1L	145	-21.01	6810299	21	5523	5053
Knm16_1165	ATXN1L	162	-23.59	5719264	22	5523	5180
Knm3_1987	ATXN1L	150	-20.35	3537194	22	5523	4845
Knm6_2323	ATXN1L	460	-64.28	1573331	22	5523	4333 3206 1180
Knm1_317	ATXN2L	155	-21	4592507	22	460	209
Knm16_1165	ATXN2L	162	-20.38	5836339	22	2610	471
Knm5_2934	ATXN2L	166	-28.56	1757812	20	972	113
Knm12_604	ATXN3	154	-20.58	594156	21	25668	22930
Knm16_1165	ATXN3	308	-45.54	5710205	22	5768	1740 5576
Knm6_2419	ATXN3	318	-54.77	2776226	20	25668	23080 10334
Knm11_716	ATXN7L3	160	-27.19	5482444	21	2458	1690
Knm16_1165	ATXN7L3	148	-21.14	5700651	22	2458	2085
Knm2_1407	ATXN7L3	148	-22.09	900097	22	2458	2065
Knm6_2323	ATXN7L3	159	-21.07	1554718	22	2458	1007
Knm1_272	ATXN7L3B	164	-21.01	3187619	20	7024	4505
Knm12_604	ATXN7L3B	151	-20.12	569135	21	7024	2565
Knm6_2323	ATXN7L3B	146	-25.49	1660170	22	7024	2503
Knm17_1130	AUNIP	150	-25.31	678689	20	987	593
Knm22_1790	AUNIP	148	-20.47	1115103	23	987	482
Knm22_1819	AUNIP	153	-22.21	4170001	21	987	408
Knm6_2419	AUNIP	155	-22.71	2642552	20	987	287
Knm17_1130	AZGP1	145	-23.03	696799	20	1337	737
Knm2_1407	AZGP1	162	-20.09	910162	22	462	172
Knm6_2323	AZGP1	146	-22.35	1564783	22	462	159
Knm16_1165	B3GALT5	292	-42.52	5701768	22	11645	3313 3832
Knm2_1407	B3GALT5	155	-23.72	901214	22	11645	4919
Knm6_2323	B3GALT5	146	-25.39	1555835	22	11645	8549
Knm1_317	B3GALT6	148	-21.74	4608301	22	1773	986
Knm11_716	B3GALT6	158	-29.16	5481129	21	1773	1507
Knm17_1130	B3GALT6	153	-20.35	680575	20	1773	1189
Knm1_317	B3GNT7	157	-22.94	4588615	22	2239	208
Knm11_716	B3GNT7	306	-47.36	5461443	21	2239	1472 1235
Knm2_1407	B3GNT7	143	-21.43	879096	22	2239	1325
Knm1_317	BACH2	145	-23.43	4586008	22	5879	5294
Knm16_1165	BACH2	150	-20.81	5677043	22	5879	1807
Knm22_1819	BACH2	307	-41.58	4149594	21	5879	2743 4856
Knm5_3166	BACH2	157	-20.34	6331664	21	5879	4405
Knm7_2944	BACH2	159	-22.53	2840352	22	5879	3274
Knm1_227	BAG1	157	-20.04	4391833	22	522	100
Knm6_2323	BAG1	166	-25.61	1555142	22	522	322
Knm7_2944	BAG1	309	-45.6	3047037	22	2748	701 1935
Knm11_716	BAIAP3	158	-25.41	5467117	21	956	248
Knm6_2419	BAIAP3	153	-20.07	2630426	20	956	789
Knm7_2944	BAIAP3	306	-53.88	2848633	22	956	449 681
Knm16_1165	BATF2	148	-21.42	5682094	22	1186	55
Knm6_2323	BATF2	155	-23.21	1536161	22	1186	72
Knm7_2944	BATF2	157	-24.01	2845403	22	1186	442
Knm1_317	BAZ1B	146	-21.13	4592791	22	1311	1112
Knm11_716	BAZ1B	150	-24.19	5465619	21	1311	266
Knm22_1819	BAZ1B	158	-24.77	4156377	21	1311	630
Knm16_1165	BAZ2A	158	-21.64	5701758	22	3022	1755
Knm17_1130	BAZ2A	148	-23.16	797778	20	2688	817
Knm5_2934	BAZ2A	306	-42.5	1774032	20	3022	513 2357
Knm6_2323	BAZ2A	152	-24.92	1555825	22	3022	66
Knm16_1165	BBX	162	-24.49	5716407	22	5867	4937
Knm22_1773	BBX	145	-20.77	6589235	20	5867	2005
Knm6_2419	BBX	160	-25.28	2661509	20	5867	4031
Knm1_227	BCAR1	169	-29.85	4515531	22	3770	2761
Knm12_685	BCAR1	168	-33.53	6982851	21	481	21
Knm22_2209	BCAR1	156	-20.67	151391	18	3770	3267
Knm6_2323	BCAR1	140	-22.02	1527676	22	481	109
Knm1_317	BCAS1	146	-20.32	4607424	22	1381	161
Knm12_604	BCAS1	144	-22.2	461491	21	1381	169
Knm6_2419	BCAS1	159	-24.65	2643561	20	1381	564
Knm7_3340	BCAS1	182	-30.64	2032579	21	4681	1106
Knm17_1411	BCAT2	142	-21.5	5031765	21	360	96
Knm22_1790	BCAT2	152	-25.3	1104039	23	360	163
Knm6_2323	BCAT2	433	-71.22	1712598	22	485	184 234 283
Knm17_1130	BCL11B	156	-24.02	672420	20	4864	3187
Knm22_1819	BCL11B	155	-26.81	4163732	21	4864	4198
Knm6_2323	BCL11B	149	-25.43	1545248	22	4864	883
Knm1_317	BCL6	155	-24.04	4620340	22	2962	1269
Knm17_1130	BCL6	150	-21.76	692614	20	2962	355
Knm5_3166	BCL6	158	-24.76	6365996	21	2962	761
Knm6_2419	BCL6	162	-27.95	2656477	20	2962	751
Knm7_2944	BCL6	316	-52.42	2874684	22	2962	288 746
Knm1_77	BCL9	158	-26.28	5893146	22	1257	29
Knm22_1819	BCL9	152	-22	4147490	21	1257	553
Knm3_1968	BCL9	173	-29.87	219764	22	1257	256
Knm5_2934	BCL9	154	-22.6	1747213	20	1257	817
Knm16_1165	BDH1	147	-23.04	5869825	22	6633	6420
Knm5_2934	BDH1	161	-20.07	1942099	20	6633	5467
Knm6_2419	BDH1	155	-23.23	2814927	20	6633	4783
Knm11_484	BICD2	151	-24.33	6128594	23	3791	2216
Knm12_604	BICD2	159	-21.4	455212	21	3791	2505
Knm16_1165	BICD2	168	-30.44	5692180	22	3791	331
Knm21_2146	BICD2	155	-21.33	2419075	19	3791	72
Knm5_2934	BICD2	145	-20.76	1764454	20	3791	1740
Knm6_2323	BICD2	157	-21.15	1546247	22	3791	1293
Knm7_2944	BICD2	151	-22.65	2855489	22	3791	944
Knm1_77	BMF	147	-20.86	5910160	22	3897	728
Knm22_1819	BMF	151	-22.39	4164504	21	3897	613
Knm6_2323	BMF	305	-51.45	1546020	22	3897	3698 1647
Knm6_2419	BMF	159	-26.51	2637055	20	3897	736
Knm7_2944	BMF	166	-29.67	2855262	22	3897	734
Knm11_716	BMP3	156	-22.8	5459884	21	3995	2000
Knm12_604	BMP3	145	-20.24	441123	21	3995	2367
Knm17_1130	BMP3	168	-26.88	659330	20	3995	2874
Knm17_1130	BMPR1A	475	-76.22	677722	20	9119	6634 7120 6983
Knm22_1790	BMPR1A	159	-22.63	1114136	23	9119	7063
Knm22_1819	BMPR1A	458	-65	4169034	21	9119	2224 4719 5150
Knm1_77	BMPR2	158	-20.86	6107602	22	1928	989
Knm12_604	BMPR2	157	-20.26	456767	21	8049	652
Knm16_1165	BMPR2	170	-23.39	5693735	22	8049	5440
Knm6_2419	BMPR2	165	-25.36	2638837	20	8049	3702
Knm11_716	BNIP3	152	-21.35	5665758	21	331	162
Knm16_1165	BNIP3	167	-24.08	5814443	22	2406	1538
Knm17_1130	BNIP3	153	-30.29	795682	20	2406	1066
Knm7_2944	BNIP3	148	-22.76	2977752	22	2406	1358
Knm1_77	BORCS5	148	-20.88	5904646	22	3918	1762
Knm16_1165	BORCS5	153	-23.8	5686439	22	3918	2301
Knm3_1968	BORCS5	157	-24.49	231264	22	3918	3585
Knm17_1130	BORCS7-ASMT	160	-22.28	662283	20	2334	1702
Knm22_1790	BORCS7-ASMT	161	-25	1098697	23	2334	365
Knm6_2419	BORCS7-ASMT	161	-26.02	2626146	20	2334	1489
Knm1_317	BRCA1	166	-28.47	4659234	22	5375	4930
Knm12_604	BRCA1	152	-21.87	513301	21	5375	4917
Knm5_2192	BRCA1	148	-21.39	5313855	22	5375	4522
Knm6_2419	BRCA1	143	-20.41	2695371	20	5375	4517
Knm7_2944	BRCA1	147	-20.89	2852542	22	1383	5
Knm11_484	BRD1	140	-21.66	6168971	23	1521	531
Knm11_716	BRD1	158	-22.45	5514350	21	1521	114
Knm17_1130	BRD1	148	-30.83	654913	20	950	511
Knm22_1819	BRD1	150	-26.04	4205108	21	1521	541
Knm1_317	BRD2	154	-23.52	4669279	22	2841	1023
Knm22_1819	BRD2	150	-23.77	4232865	21	2841	821
Knm6_2419	BRD2	155	-20.87	2638561	20	787	221
Knm1_77	BRD4	145	-23.03	5911368	22	2233	1977
Knm12_604	BRD4	148	-23.84	456193	21	2233	1614
Knm6_2323	BRD4	161	-33.14	1530617	22	2858	1669
Knm22_1819	BRD7	157	-22.32	4178986	21	3254	1725
Knm6_2323	BRD7	169	-27.25	1679135	22	2481	2125
Knm6_2419	BRD7	304	-42.22	2770170	20	2481	231 2241
Knm16_1165	BRF2	160	-22.02	5674244	22	1222	623
Knm22_1790	BRF2	153	-24.24	1217458	23	253	96
Knm5_2934	BRF2	145	-20.08	1746518	20	1222	334
Knm11_716	BRMS1	159	-29.29	5580565	21	417	111
Knm12_604	BRMS1	163	-22.15	561804	21	417	222
Knm17_1130	BRMS1	152	-21.19	671351	20	543	245
Knm22_1819	BRMS1	154	-28.16	4271323	21	417	120
Knm7_2944	BRMS1	159	-29.83	2962081	22	417	111
Knm1_272	BRMS1L	152	-22.08	3202865	20	432	393
Knm1_77	BRMS1L	158	-22.31	6036651	22	1321	541
Knm6_2323	BRMS1L	161	-23.35	1668774	22	554	379
Knm1_227	BRPF3	159	-25.26	4423528	22	3582	353
Knm1_317	BRPF3	151	-20.41	4596160	22	1981	500
Knm11_716	BRPF3	158	-22.53	5468988	21	1981	1489
Knm6_2323	BRPF3	156	-21.74	1541262	22	1981	1052
Knm1_317	BRSK2	153	-24.57	4722834	22	1422	830
Knm12_685	BRSK2	142	-21.91	6991377	21	1696	1293
Knm6_2323	BRSK2	153	-28.89	1667936	22	1422	578
Knm6_2419	BRSK2	149	-22.3	2627237	20	1696	665
Knm11_716	BSG	148	-20.41	5649655	21	780	4
Knm17_1130	BSG	150	-20.45	669317	20	746	724
Knm6_2323	BSG	149	-20.61	1542145	22	746	209
Knm12_604	BSN	153	-20.71	440998	21	4060	3697
Knm6_2323	BSN	154	-20.33	1532033	22	4060	3410
Knm7_2944	BSN	153	-26.23	2841275	22	4060	1214
Knm1_227	BSND	171	-28.23	4386686	22	2255	232
Knm22_1819	BSND	154	-23.47	4168479	21	2255	498
Knm3_1987	BSND	163	-20.81	3513858	22	2255	2177
Knm10_427	BSPRY	158	-20.16	6789587	21	1091	131
Knm11_716	BSPRY	147	-23.53	5480345	21	1091	764
Knm5_2934	BSPRY	146	-20.08	1770826	20	1091	180
Knm1_317	BTBD7	151	-20.13	4596032	22	4723	2210
Knm1_77	BTBD7	145	-20.58	5905274	22	4723	622
Knm17_1130	BTBD7	305	-51.9	671225	20	6743	1144 893
Knm2_1407	BTBD7	154	-21.85	889432	22	6743	1618
Knm1_77	BTBD9	153	-24.37	5896494	22	6534	5668
Knm11_484	BTBD9	154	-25.98	6114701	23	6534	5001
Knm12_604	BTBD9	146	-20.18	441319	21	6534	6218
Knm22_1819	BTBD9	153	-21.16	4150838	21	6534	2559
Knm6_2419	BTBD9	604	-92.76	2623389	20	6534	2762 2648 2062 5275
Knm12_604	BTN2A2	158	-23.15	455321	21	1907	1367
Knm22_1790	BTN2A2	155	-21.19	1148681	23	713	37
Knm7_2944	BTN2A2	151	-22.21	2894337	22	713	645
Knm6_2323	BTN3A2	152	-23.64	1545229	22	1824	564
Knm6_2419	BTN3A2	145	-20.42	2652398	20	336	168
Knm7_2944	BTN3A2	159	-21.66	2854471	22	1824	1485
Knm1_317	BTRC	145	-22.18	4602110	22	4198	3333
Knm22_1819	BTRC	156	-21.92	4165696	21	4198	1
Knm7_2944	BTRC	155	-21.72	2856454	22	4198	1128
Knm1_317	BUB1B-PAK6	169	-32.43	4652570	22	1931	185
Knm22_1819	BUB1B-PAK6	155	-21.46	4216156	21	1931	1100
Knm6_2323	BUB1B-PAK6	151	-23.09	1597672	22	1931	909
Knm6_2419	BUB1B-PAK6	314	-51.77	2688707	20	1931	275 635
Knm1_227	BUB3	159	-22.51	4385812	22	6632	6152
Knm16_1165	BUB3	147	-21.38	5695054	22	6632	1631
Knm6_2419	BUB3	145	-21.19	2640156	20	6632	1902
Knm11_716	C10orf105	306	-47.05	5488260	21	4226	3344 2891
Knm12_604	C10orf105	151	-22.15	469499	21	4226	2336
Knm5_2934	C10orf105	151	-20.35	1778741	20	4226	1683
Knm6_2323	C10orf105	307	-42.23	1560534	22	4226	2144 3352
Knm7_2944	C10orf105	164	-26.52	2869776	22	4226	2890
Knm1_317	C10orf67	152	-24.26	4609148	22	988	535
Knm1_77	C10orf67	141	-22.88	6103200	22	2257	2046
Knm22_1790	C10orf67	307	-51	1101725	23	2173	1516 918
Knm22_2209	C10orf67	160	-21.65	211611	18	2257	1862
Knm11_484	C12orf43	148	-21.93	6255009	23	1125	774
Knm17_1411	C12orf43	155	-27	5163974	21	1125	519
Knm22_1819	C12orf43	156	-21.18	4152465	21	3667	257
Knm6_2323	C12orf43	142	-24.85	1533981	22	3667	1945
Knm12_604	C12orf45	142	-21.81	591545	21	22928	10628
Knm22_1819	C12orf45	152	-21.07	4301064	21	22928	12660
Knm6_2419	C12orf45	157	-22.4	2773615	20	22928	9828
Knm1_272	C12orf66	156	-20.4	3091090	20	2759	851
Knm12_604	C12orf66	141	-21.98	472606	21	2759	1735
Knm12_685	C12orf66	152	-21.69	6990164	21	1263	321
Knm22_1790	C12orf66	150	-20.31	1127227	23	2759	1906
Knm1_227	C14orf159	157	-25	4494020	22	2455	296
Knm11_716	C14orf159	149	-20.64	5585055	21	2455	164
Knm12_604	C14orf159	162	-26.09	439908	21	799	138
Knm16_1165	C14orf159	159	-25.01	5802980	22	619	33
Knm6_2323	C14orf159	150	-26.8	1657329	22	2455	1640
Knm11_716	C14orf80	158	-28.98	5596733	21	989	383
Knm17_1130	C14orf80	160	-25.27	669043	20	629	519
Knm17_1411	C14orf80	153	-26.23	5160319	21	989	150
Knm1_272	C15orf39	157	-20.78	3071627	20	1053	898
Knm1_77	C15orf39	155	-23.84	5908318	22	1053	695
Knm11_716	C15orf39	311	-52.11	5623201	21	1432	60 348
Knm5_2934	C15orf39	311	-45.15	1762385	20	1053	722 30
Knm7_2944	C15orf39	155	-20.63	2853420	22	1053	887
Knm10_427	C15orf40	147	-23.22	6772368	21	10774	8048
Knm16_1165	C15orf40	308	-42.75	5681333	22	10774	6424 6412
Knm6_2419	C15orf40	157	-26.39	2626435	20	10774	3639
Knm10_427	C15orf59	173	-29.64	6928178	21	4486	785
Knm11_716	C15orf59	150	-23.12	5618936	21	4486	2717
Knm22_1790	C15orf59	149	-20.28	1254796	23	4486	1343
Knm6_2419	C15orf59	302	-47.17	2782245	20	4486	627 133
Knm7_2944	C15orf59	142	-22.78	3000452	22	4486	625
Knm11_484	C16orf54	152	-24.11	6121919	23	1814	78
Knm17_1130	C16orf54	470	-79.3	666744	20	1814	1108 306 1407
Knm22_1790	C16orf54	157	-22.91	1103158	23	1814	1437
Knm5_2934	C16orf54	158	-20.14	1757779	20	1814	905
Knm1_317	C16orf58	149	-20.14	4593291	22	1346	824
Knm16_1165	C16orf58	156	-20.89	5835386	22	148	57
Knm17_1130	C16orf58	147	-22.8	819140	20	562	443
Knm1_227	C16orf87	161	-24.19	4528062	22	394	2
Knm5_2934	C16orf87	163	-26.02	1777757	20	6345	4282
Knm6_2419	C16orf87	161	-27.3	2650585	20	6345	5554
Knm17_1130	C17orf105	476	-78.39	720738	20	3230	2658 2337 1537
Knm22_1819	C17orf105	150	-20.53	4212050	21	3230	2800
Knm3_1968	C17orf105	171	-28.86	284324	22	3230	3133
Knm12_604	C17orf107	152	-20.19	465698	21	2399	346
Knm17_1411	C17orf107	153	-28.28	5144738	21	633	363
Knm5_2934	C17orf107	155	-24.7	1774940	20	2399	1639
Knm6_2323	C17orf107	144	-23.56	1556733	22	2399	1861
Knm1_227	C17orf74	157	-21.83	4528595	22	861	665
Knm12_685	C17orf74	153	-22.18	7147079	21	861	412
Knm16_1165	C17orf74	150	-23.08	5837837	22	861	474
Knm7_2944	C17orf74	162	-22.84	3001146	22	861	688
Knm10_427	C17orf75	160	-20.33	6765645	21	3320	442
Knm22_1790	C17orf75	149	-20.16	1092263	23	3320	2983
Knm6_2419	C17orf75	487	-76.16	2619712	20	3320	1870 863 2645
Knm1_77	C18orf32	157	-20.78	6090948	22	5095	1634
Knm2_1407	C18orf32	151	-20.61	1072187	22	5095	2125
Knm6_2419	C18orf32	471	-71.39	2817843	20	5095	4031 5034 4259
Knm1_77	C19orf25	148	-26.82	5939110	22	877	646
Knm11_484	C19orf25	150	-21.38	6157317	23	877	393
Knm12_685	C19orf25	153	-28.85	7030145	21	877	733
Knm5_3166	C19orf44	167	-21.84	6516931	21	159	33
Knm6_2323	C19orf44	167	-26.1	1528045	22	1297	273
Knm7_2944	C19orf44	141	-24.43	3020130	22	239	90
Knm1_77	C19orf47	164	-20.47	5906632	22	1335	466
Knm16_1165	C19orf47	154	-22.19	5688425	22	1335	965
Knm6_2323	C19orf47	154	-27.8	1542492	22	1335	897
Knm5_2192	C1orf115	160	-23.54	5241532	22	2426	369
Knm6_2323	C1orf115	166	-36.2	1532013	22	2426	2186
Knm7_2944	C1orf115	161	-29.55	2841255	22	2426	1913
Knm1_227	C1orf158	158	-23.42	4558581	22	2748	2500
Knm22_1790	C1orf158	148	-20.6	1285476	23	2748	959
Knm22_1819	C1orf158	156	-20.95	4340374	21	2748	1722
Knm6_2419	C1orf158	154	-24.79	2812925	20	2748	1729
Knm22_1790	C1orf159	142	-20.68	1120031	23	1269	403
Knm22_1819	C1orf159	150	-24.73	4174929	21	1269	421
Knm6_2323	C1orf159	153	-26.59	1556445	22	1269	970
Knm17_1130	C1orf204	158	-27.54	678459	20	1683	327
Knm22_1790	C1orf204	148	-22.69	1114873	23	1683	857
Knm7_2944	C1orf204	160	-20.72	2860529	22	1683	1250
Knm11_716	C1orf226	158	-28.44	5537297	21	3135	611
Knm16_1165	C1orf226	146	-23.17	5755504	22	3135	1807
Knm2_1407	C1orf226	154	-22.85	954950	22	3135	1648
Knm1_317	C1orf74	152	-25.37	4591330	22	3617	2264
Knm6_2419	C1orf74	148	-20.86	2627467	20	3617	1516
Knm7_2944	C1orf74	152	-20.59	2845674	22	3617	1513
Knm1_317	C1QTNF3-AMACR	157	-22.98	4608102	22	2494	2043
Knm16_1165	C1QTNF3-AMACR	161	-21.72	5699137	22	2494	1031
Knm6_2323	C1QTNF3-AMACR	140	-21.18	1553204	22	2494	2213
Knm11_716	C1QTNF7	314	-58.28	5464466	21	3366	1659 704
Knm12_685	C1QTNF7	147	-20.03	6991915	21	3366	1645
Knm3_1968	C1QTNF7	159	-23.53	227498	22	3366	20
Knm11_716	C1QTNF8	154	-24.52	5465383	21	594	114
Knm17_1130	C1QTNF8	147	-24.16	664829	20	594	335
Knm6_2323	C1QTNF8	160	-27.43	1537657	22	594	78
Knm17_1130	C2	150	-23.2	661129	20	315	184
Knm3_1968	C2	150	-21.16	224715	22	315	17
Knm6_2323	C2	145	-22.05	1533957	22	315	9
Knm22_1819	C22orf29	153	-23.41	4160359	21	5021	4473
Knm5_2934	C22orf29	158	-24.14	1760082	20	5021	2917
Knm6_2323	C22orf29	162	-24.87	1541875	22	5021	391
Knm6_2419	C22orf29	169	-32.11	2632910	20	5021	4074
Knm1_227	C22orf39	157	-25.9	4374995	22	894	647
Knm1_317	C22orf39	154	-21.18	4702435	22	2697	1839
Knm11_484	C22orf39	173	-22.14	6229884	23	2697	1073
Knm6_2419	C22orf39	146	-24.97	2738572	20	2697	1415
Knm1_317	C2orf81	160	-25.87	4704920	22	4967	4672
Knm16_1165	C2orf81	149	-20.69	5795955	22	4967	1270
Knm22_1819	C2orf81	297	-42.32	4268506	21	4967	639 1420
Knm12_604	C2orf88	158	-20.44	448057	21	3336	969
Knm22_1819	C2orf88	163	-24.36	4157576	21	3336	555
Knm6_2323	C2orf88	145	-24.76	1539092	22	3336	1948
Knm11_716	C3orf52	157	-27.59	5457818	21	1564	1263
Knm18_1200	C3orf52	150	-20.44	1311885	21	1564	4
Knm22_1819	C3orf52	146	-20.12	4148576	21	1564	599
Knm10_427	C3orf62	160	-21.58	6777243	21	2394	984
Knm17_1130	C3orf62	311	-52.09	667447	20	2394	2376 1823
Knm22_1773	C3orf62	157	-20.3	6559036	20	2394	1135
Knm6_2323	C3orf62	294	-44.52	1540275	22	2394	1437 1474
Knm6_2419	C3orf62	159	-24.68	2631310	20	2394	607
Knm1_317	C3orf67	152	-24.48	4654707	22	1769	658
Knm11_716	C3orf67	150	-22.91	5547322	21	2264	1766
Knm17_1130	C3orf67	149	-22.59	726981	20	1769	208
Knm1_272	C4orf22	146	-20.02	3169350	20	2877	979
Knm1_77	C4orf22	160	-20.32	6006041	22	2877	1822
Knm22_1819	C4orf22	150	-22.03	4260385	21	2877	924
Knm17_1130	C4orf26	147	-22.45	662877	20	1446	791
Knm22_1790	C4orf26	152	-20.49	1099291	23	1446	817
Knm22_1819	C4orf26	150	-22.42	4154189	21	1446	773
Knm16_1165	C4orf50	154	-20.05	5687515	22	3072	1930
Knm2_1407	C4orf50	149	-25.55	1084200	22	10750	10586
Knm5_2934	C4orf50	162	-23.24	1759789	20	3072	1871
Knm1_317	C5orf56	153	-21.88	4625627	22	1333	898
Knm12_604	C5orf56	150	-23.31	466963	21	255	106
Knm16_1165	C5orf56	154	-22.35	5685931	22	4255	4212
Knm22_1790	C5orf56	156	-24.57	1284831	23	2347	1584
Knm6_2323	C5orf56	149	-25.68	1721245	22	2347	1264
Knm11_716	C6orf106	300	-45.48	5478156	21	3277	2383 2242
Knm3_1968	C6orf106	154	-20.69	241188	22	3277	2710
Knm6_2323	C6orf106	300	-49.52	1550430	22	3277	521 1309
Knm17_1130	C6orf132	168	-29.65	673404	20	419	9
Knm22_1819	C6orf132	150	-22.42	4164716	21	419	151
Knm6_2419	C6orf132	158	-25.39	2628438	20	2643	1484
Knm11_716	C6orf222	145	-24.48	5515540	21	1599	959
Knm2_1407	C6orf222	156	-21.46	933193	22	1599	648
Knm6_2419	C6orf222	153	-21.58	2678849	20	1599	152
Knm1_227	C6orf89	163	-22.09	4451515	22	5523	3622
Knm1_77	C6orf89	147	-20.52	5978964	22	5523	2671
Knm2_1407	C6orf89	170	-29.38	960203	22	5523	4281
Knm22_1773	C6orf89	160	-21.39	6633585	20	5523	4231
Knm6_2323	C6orf89	163	-25.88	1614824	22	5523	4574
Knm6_2419	C6orf89	161	-27.06	2705859	20	5523	3059
Knm3_1968	C7orf50	159	-20.32	235502	22	639	296
Knm5_2934	C7orf50	140	-21.06	1762951	20	639	166
Knm7_2944	C7orf50	159	-23.66	2853986	22	639	144
Knm12_604	C8orf82	157	-26.67	444127	21	1749	1414
Knm5_2934	C8orf82	147	-22.51	1753369	20	1749	1292
Knm7_2944	C8orf82	146	-21.5	2967372	22	1609	1460
Knm11_716	C8orf86	147	-21.37	5471835	21	1553	1232
Knm12_604	C8orf86	157	-21.78	495177	21	1084	22
Knm5_2192	C8orf86	161	-23.74	5253628	22	1553	1485
Knm1_317	C9orf172	151	-22.66	4643787	22	1456	502
Knm16_1165	C9orf172	152	-20.33	5734822	22	1456	266
Knm6_2323	C9orf172	156	-20.97	1588889	22	1456	31
Knm1_227	CABLES1	157	-24.72	4367533	22	3100	1201
Knm10_427	CABLES1	156	-21.06	6767810	21	3100	329
Knm17_1411	CABLES1	146	-27.95	5022154	21	3100	865
Knm1_77	CACNA1D	154	-20.62	6106417	22	2618	940
Knm17_1130	CACNA1D	152	-20.96	869449	20	2618	1
Knm18_1200	CACNA1D	161	-22.28	1524070	21	2618	89
Knm6_2323	CACNA1D	153	-20.88	1534463	22	2327	263
Knm17_1130	CACNA1E	302	-46.14	670797	20	7944	3548 2957
Knm3_1987	CACNA1E	174	-24.73	3507488	22	7944	6296
Knm5_3166	CACNA1E	169	-22.96	6344179	21	7944	2504
Knm6_2323	CACNA1E	157	-20.38	1543625	22	7944	348
Knm6_2419	CACNA1E	145	-22.96	2634660	20	7944	2056
Knm11_484	CACNA1G	152	-28.27	6213807	23	1490	1334
Knm12_604	CACNA1G	152	-20.74	540425	21	1490	834
Knm6_2419	CACNA1G	159	-25.75	2655812	20	203	6
Knm1_317	CACNA1I	176	-31.34	4615953	22	3332	2817
Knm1_77	CACNA1I	159	-23.33	5925195	22	3332	1062
Knm6_2323	CACNA1I	156	-25.02	1561055	22	3332	954
Knm6_2419	CACNA1I	150	-22.52	2652090	20	3332	2405
Knm1_77	CACNA2D3	160	-22.87	5966042	22	1470	820
Knm16_1165	CACNA2D3	168	-24.72	5760764	22	1705	1308
Knm3_1968	CACNA2D3	162	-21.22	305589	22	1705	1122
Knm5_2934	CACNA2D3	157	-21.86	1833038	20	1705	581
Knm1_77	CACNA2D4	162	-20.82	5952609	22	2480	925
Knm12_604	CACNA2D4	155	-22.09	497434	21	2480	902
Knm6_2419	CACNA2D4	148	-23.15	2679504	20	2480	811
Knm11_716	CACNB1	154	-22.11	5492026	21	1737	1102
Knm22_1790	CACNB1	161	-20.14	1127886	23	1737	573
Knm6_2323	CACNB1	153	-20.14	1564300	22	1737	1488
Knm1_227	CACNB2	146	-21.12	4550676	22	3294	704
Knm17_1130	CACNB2	145	-21.14	661083	20	1403	1090
Knm22_1790	CACNB2	153	-20.81	1097497	23	1403	387
Knm1_227	CACNB3	165	-26.25	4369363	22	1042	597
Knm16_1165	CACNB3	149	-20.2	5818851	22	501	323
Knm6_2323	CACNB3	155	-21.69	1532672	22	1042	783
Knm16_1165	CACNB4	151	-20.46	5808910	22	6351	6139
Knm22_2209	CACNB4	159	-22.5	210261	18	3301	102
Knm5_3166	CACNB4	166	-26.13	6545344	21	4417	3408
Knm6_2419	CACNB4	151	-20.43	2754012	20	6351	4040
Knm1_317	CACNG8	304	-50.02	4591868	22	7366	2370 7001
Knm2_1407	CACNG8	161	-20.08	882349	22	7366	2036
Knm5_2934	CACNG8	155	-22.02	1755177	20	7366	2254
Knm6_2419	CACNG8	324	-52.28	2628005	20	7366	6386 5719
Knm1_77	CACTIN	167	-27.78	5944901	22	1282	214
Knm11_484	CACTIN	143	-21.03	6290094	23	1284	429
Knm17_1130	CACTIN	145	-23.64	834919	20	1284	1031
Knm22_1819	CACTIN	159	-31.22	4199245	21	1282	287
Knm1_77	CALB2	145	-22.94	5896544	22	573	157
Knm16_1165	CALB2	152	-20.16	5678337	22	573	275
Knm6_2323	CALB2	148	-22.06	1532404	22	573	38
Knm16_1165	CALCOCO1	162	-21.4	5821533	22	1937	1144
Knm3_1987	CALCOCO1	156	-20.18	3495832	22	3427	1479
Knm6_2323	CALCOCO1	149	-23.44	1531969	22	3427	125
Knm12_604	CALML4	158	-24.27	472597	21	3272	1025
Knm17_1130	CALML4	149	-20.95	690804	20	3272	929
Knm22_1819	CALML4	150	-23.82	4181495	21	589	1
Knm1_317	CALN1	156	-23.63	4593885	22	8284	5109
Knm16_1165	CALN1	154	-23.99	5684920	22	8284	1580
Knm17_1130	CALN1	155	-29.5	666159	20	8284	5579
Knm5_2934	CALN1	144	-24.55	1757194	20	8284	4642
Knm6_2323	CALN1	317	-48.26	1538987	22	8284	3864 2057
Knm12_685	CAMK1	147	-21.6	7015815	21	1141	805
Knm5_2934	CAMK1	145	-20.03	1749313	20	197	46
Knm6_2323	CAMK1	150	-21.15	1531106	22	197	73
Knm11_484	CAMK1D	144	-26.36	6307735	23	6658	57
Knm16_1165	CAMK1D	152	-21.91	5871321	22	6658	4596
Knm17_1130	CAMK1D	305	-48.74	852560	20	6658	5412 5472
Knm6_2419	CAMK1D	157	-26.39	2817032	20	849	813
Knm22_1790	CAMK2A	156	-27.07	1106915	23	3219	229
Knm22_1819	CAMK2A	160	-27.14	4161813	21	3219	546
Knm5_2934	CAMK2A	313	-45.12	1761536	20	3219	567 1173
Knm1_227	CAMK2B	147	-21.63	4398150	22	2369	1077
Knm18_1200	CAMK2B	155	-22.23	1343252	21	2369	1641
Knm5_2192	CAMK2B	150	-22.57	5363995	22	1463	895
Knm11_716	CAMKK1	155	-22.98	5455334	21	747	80
Knm2_1407	CAMKK1	152	-20.7	888344	22	1896	1479
Knm22_1773	CAMKK1	165	-20.24	6561726	20	1896	221
Knm6_2323	CAMKK1	167	-30.64	1542965	22	1896	1255
Knm7_2944	CAMKK1	169	-31.35	2836850	22	747	83
Knm12_604	CAMKK2	154	-29.87	447643	21	3100	2856
Knm3_1968	CAMKK2	157	-21.59	229436	22	3100	1545
Knm7_2944	CAMKK2	145	-22.25	2847920	22	3100	568
Knm11_484	CAMKV	159	-29.67	6118484	23	1329	409
Knm17_1130	CAMKV	144	-20.51	663309	20	1329	870
Knm7_2944	CAMKV	159	-23.69	2845379	22	1329	1050
Knm1_227	CAMTA2	156	-23.68	4525185	22	3933	114
Knm16_1165	CAMTA2	155	-21.74	5688648	22	758	118
Knm22_1819	CAMTA2	150	-22.51	4161199	21	758	487
Knm6_2323	CAMTA2	293	-53.25	1688494	22	3933	1858 812
Knm1_227	CANX	152	-22.49	4484264	22	1467	1061
Knm10_427	CANX	160	-21.2	6766525	21	2281	7
Knm16_1165	CANX	160	-21.72	5675490	22	2281	19
Knm3_1968	CANX	162	-24.26	338331	22	1467	817
Knm7_2944	CANX	141	-20.06	2838799	22	2281	1397
Knm1_317	CAPZA2	162	-24.82	4597514	22	4182	3602
Knm2_1407	CAPZA2	151	-21.58	887995	22	4182	2521
Knm6_2419	CAPZA2	308	-47.61	2633651	20	4182	1965 3483
Knm3_1987	CARMIL2	157	-22.86	3680497	22	621	369
Knm6_2323	CARMIL2	153	-23.83	1716634	22	621	356
Knm6_2419	CARMIL2	156	-25	2810093	20	580	444
Knm1_227	CASK	165	-21.48	4412228	22	5486	1726
Knm16_1165	CASK	147	-20.73	5721470	22	5486	4398
Knm17_1130	CASK	152	-21.84	702709	20	5486	4373
Knm6_2419	CASK	302	-48.01	2666572	20	5486	4269 1377
Knm7_2944	CASK	300	-45.51	2884779	22	5486	4270 5080
Knm10_427	CASR	163	-22.93	6976693	21	6438	3177
Knm16_1165	CASR	162	-25.17	5885658	22	6438	2424
Knm18_1200	CASR	158	-21.77	1404689	21	767	373
Knm5_2934	CASR	309	-44.79	1957932	20	6438	3933 3344
Knm6_2323	CASR	143	-20.73	1739725	22	6438	1500
Knm7_2944	CASR	317	-52.8	3048967	22	6438	3295 4395
Knm1_227	CBL	159	-22.05	4367723	22	8368	6534
Knm1_317	CBL	146	-22.57	4585930	22	8368	1738
Knm1_77	CBL	154	-24.76	5895172	22	8368	6033
Knm16_1165	CBL	158	-22.75	5676965	22	8368	6765
Knm22_1819	CBL	150	-20.34	4361515	21	420	110
Knm5_2934	CBL	151	-24.34	1749239	20	8368	5471
Knm5_3166	CBL	174	-33.32	6331586	21	8368	6246
Knm1_77	CBR1	155	-22.27	5898777	22	284	28
Knm22_1819	CBR1	145	-21.24	4282532	21	1227	257
Knm7_2944	CBR1	164	-23.2	2873554	22	88	20
Knm17_1130	CBR4	148	-23.08	760443	20	897	509
Knm6_2419	CBR4	144	-21.36	2739747	20	873	597
Knm7_2944	CBR4	151	-28.47	2957954	22	873	590
Knm1_77	CBWD1	318	-46.77	6089562	22	2067	1362 1650
Knm3_1968	CBWD1	154	-20.52	247094	22	1704	1021
Knm6_2419	CBWD1	157	-25.39	2816457	20	2067	2022
Knm10_427	CBX5	146	-20.22	6764978	21	10815	4915
Knm11_716	CBX5	449	-69.57	5455736	21	10815	2251 2662 9369
Knm12_604	CBX5	166	-21.04	436975	21	10815	536
Knm11_484	CBX8	144	-20.03	6119081	23	2503	1614
Knm12_604	CBX8	146	-23.87	445699	21	2503	53
Knm2_1407	CBX8	150	-26.17	882113	22	2503	1098
Knm1_77	CC2D1B	160	-21.5	5914219	22	2926	2429
Knm22_1819	CC2D1B	150	-20.69	4168563	21	2926	1832
Knm5_2934	CC2D1B	160	-20.41	1768286	20	2926	1513
Knm6_2419	CC2D1B	321	-49.56	2641114	20	2926	2723 1548
Knm16_1165	CC2D2A	162	-23.86	5734598	22	1050	336
Knm5_2934	CC2D2A	151	-22.03	1958192	20	4400	129
Knm6_2419	CC2D2A	155	-20.36	2831020	20	4400	15
Knm7_2944	CC2D2A	300	-44.33	3049227	22	4400	1400 12
Knm1_317	CCBE1	305	-47.07	4618803	22	4968	2576 2681
Knm12_604	CCBE1	149	-20.37	472870	21	4968	3440
Knm16_1165	CCBE1	163	-22.86	5709838	22	4968	4683
Knm5_2934	CCBE1	155	-22.28	1782112	20	4968	2383
Knm1_317	CCDC117	149	-20.38	4648891	22	691	504
Knm17_1130	CCDC117	150	-20.25	656507	20	2969	949
Knm22_1819	CCDC117	150	-22.42	4147819	21	2969	1027
Knm1_317	CCDC125	161	-26.85	4612034	22	982	917
Knm22_1819	CCDC125	147	-20.63	4175620	21	982	672
Knm3_1968	CCDC125	148	-20.16	250144	22	2554	1292
Knm11_716	CCDC137	148	-20.1	5619335	21	522	64
Knm17_1130	CCDC137	149	-22.65	818781	20	522	456
Knm6_2419	CCDC137	152	-24.35	2782644	20	522	407
Knm7_2944	CCDC137	155	-27.28	2849560	22	1195	356
Knm1_317	CCDC14	152	-21.93	4620565	22	3656	507
Knm11_716	CCDC14	140	-20.84	5493393	21	3656	2346
Knm16_1165	CCDC14	161	-28.05	5711600	22	3656	442
Knm1_227	CCDC150	152	-24.17	4416118	22	2627	1624
Knm22_1819	CCDC150	143	-20.1	4197911	21	2627	37
Knm5_2934	CCDC150	164	-22.87	1797634	20	2627	715
Knm1_77	CCDC184	155	-22.99	5903199	22	1219	1068
Knm12_685	CCDC184	159	-23.95	6994234	21	1219	67
Knm3_1968	CCDC184	159	-20.72	229817	22	1219	546
Knm11_484	CCDC189	159	-23.59	6258673	23	280	125
Knm11_716	CCDC189	145	-20.22	5604052	21	280	19
Knm6_2323	CCDC189	150	-20.43	1675606	22	502	462
Knm7_2944	CCDC189	153	-23.55	2984848	22	502	367
Knm1_77	CCDC190	156	-24.26	5914273	22	1806	252
Knm10_427	CCDC190	183	-31.6	6787101	21	1806	465
Knm16_1165	CCDC190	157	-23.12	5696066	22	1806	232
Knm17_1130	CCDC190	145	-21.5	677305	20	1806	375
Knm1_227	CCDC191	153	-22.54	4436422	22	2552	874
Knm1_77	CCDC191	158	-24.11	5896888	22	1018	923
Knm7_2944	CCDC191	156	-20.4	2908973	22	2552	1612
Knm1_317	CCDC3	144	-20.44	4607840	22	1791	1418
Knm1_77	CCDC3	163	-22.52	5917082	22	1791	397
Knm12_604	CCDC3	140	-24.76	461907	21	1791	1195
Knm22_1819	CCDC3	156	-22.05	4171426	21	1791	901
Knm1_317	CCDC40	152	-23.49	4617817	22	838	647
Knm6_2323	CCDC40	153	-20.58	1691271	22	297	63
Knm6_2419	CCDC40	297	-40.83	2640241	20	568	514 32
Knm12_604	CCDC57	143	-20.24	467765	21	1358	612
Knm6_2323	CCDC57	145	-23.44	1707279	22	264	50
Knm6_2419	CCDC57	159	-23.17	2649835	20	1358	1321
Knm1_272	CCDC66	164	-23.34	3113331	20	2197	532
Knm17_1130	CCDC66	152	-25.94	713054	20	2197	1004
Knm3_1987	CCDC66	165	-21.42	3504507	22	2325	504
Knm16_1165	CCDC80	153	-20.87	5673799	22	8623	3670
Knm5_2934	CCDC80	148	-20.46	1746073	20	8623	3792
Knm5_3166	CCDC80	156	-20.91	6328420	21	8623	5478
Knm5_2934	CCDC85C	166	-22.71	1776396	20	15066	10114
Knm5_3166	CCDC85C	146	-20.12	6358743	21	15066	2404
Knm6_2419	CCDC85C	306	-48.08	2649224	20	15066	14171 9682
Knm12_685	CCDC88C	157	-20.32	7141191	21	3223	793
Knm5_2192	CCDC88C	159	-20.03	5248081	22	1300	493
Knm7_2944	CCDC88C	145	-20.42	2995258	22	3223	1143
Knm17_1130	CCDC93	150	-22.03	665293	20	4865	1567
Knm22_1790	CCDC93	163	-26.89	1101707	23	4865	2893
Knm3_1968	CCDC93	159	-21.47	228879	22	4865	3584
Knm6_2323	CCDC93	145	-25.32	1538121	22	4865	1212
Knm16_1165	CCL22	311	-45.08	5674213	22	2602	2530 185
Knm22_1773	CCL22	161	-24.38	6547041	20	2602	626
Knm5_2934	CCL22	141	-25.25	1746487	20	2602	1177
Knm7_2944	CCL22	157	-24.31	2837522	22	2602	707
Knm11_716	CCNB1	158	-24.82	5563290	21	564	293
Knm3_1968	CCNB1	156	-23.2	222586	22	614	355
Knm7_2944	CCNB1	153	-24.1	2944806	22	564	297
Knm11_716	CCND2	153	-21.55	5458533	21	5341	3898
Knm16_1165	CCND2	162	-20.11	5676740	22	5341	2557
Knm6_2323	CCND2	165	-26.75	1530807	22	5341	4018
Knm11_716	CCND3	148	-21.4	5474815	21	1007	534
Knm17_1130	CCND3	158	-26.04	674261	20	1007	42
Knm6_2323	CCND3	150	-26.27	1547089	22	1007	839
Knm1_272	CCNDBP1	148	-20.21	3212903	20	1168	704
Knm22_1819	CCNDBP1	150	-22.03	4150968	21	2335	1661
Knm7_2944	CCNDBP1	143	-20.28	2841726	22	2335	2283
Knm11_716	CCNI2	144	-21.24	5483078	21	1194	410
Knm22_2209	CCNI2	168	-21.64	27903	18	1194	274
Knm6_2419	CCNI2	153	-22.48	2646387	20	1194	842
Knm1_317	CCNJL	168	-27.89	4616407	22	1726	982
Knm17_1130	CCNJL	154	-22.38	688681	20	1726	946
Knm22_1819	CCNJL	156	-25.79	4150377	21	398	1
Knm6_2419	CCNJL	164	-24.2	2652544	20	1726	783
Knm17_1130	CCNL1	148	-20.79	730200	20	45	1
Knm22_1819	CCNL1	143	-20.2	4232915	21	1782	267
Knm5_3166	CCNL1	168	-24.23	6411852	21	861	454
Knm10_427	CCNL2	162	-21.94	6800815	21	736	598
Knm11_716	CCNL2	143	-22.92	5543396	21	2099	708
Knm12_685	CCNL2	147	-23.57	7019022	21	736	205
Knm22_1819	CCNL2	165	-28.12	4240849	21	1920	120
Knm5_3166	CCNL2	164	-22.38	6416224	21	2099	823
Knm7_2944	CCNL2	153	-29.74	2924912	22	2099	1251
Knm17_1130	CCNT1	152	-29.04	694329	20	1462	1401
Knm5_2934	CCNT1	164	-23.49	1785364	20	1462	200
Knm6_2323	CCNT1	147	-21.04	1531042	22	4569	1836
Knm1_77	CCNT2	158	-23.34	5938385	22	4272	1954
Knm2_1407	CCNT2	147	-21.29	935622	22	430	216
Knm3_1987	CCNT2	169	-24	3555717	22	1808	101
Knm11_716	CCNY	170	-31.2	5458975	21	3499	2895
Knm2_1407	CCNY	155	-23.72	876628	22	3499	3225
Knm22_1819	CCNY	150	-21.89	4149733	21	3499	3324
Knm6_2323	CCNY	317	-54.83	1531249	22	3499	2258 158
Knm7_2944	CCNY	152	-25.06	2840491	22	3499	2967
Knm1_77	CCSER2	156	-21.27	5892801	22	4974	3601
Knm17_1130	CCSER2	147	-22.92	655833	20	4974	2133
Knm22_1790	CCSER2	305	-41.02	1092247	23	4974	3867 2026
Knm22_1819	CCSER2	150	-22.28	4147145	21	4974	2115
Knm1_317	CD22	158	-22.58	4582508	22	658	158
Knm11_484	CD22	163	-22.15	6291911	23	2418	1414
Knm11_716	CD22	156	-27.38	5637290	21	2418	1466
Knm16_1165	CD22	163	-22.88	5856398	22	363	277
Knm7_2944	CD22	151	-24.11	3018806	22	2418	1433
Knm6_2323	CD226	155	-25.65	1532972	22	11039	10287
Knm6_2419	CD226	313	-41.71	2624007	20	11039	5535 10642
Knm7_2944	CD226	147	-21.14	2842214	22	11039	6501
Knm17_1130	CD28	158	-29.82	668422	20	4000	81
Knm2_1407	CD28	158	-20.34	886629	22	4000	371
Knm22_2209	CD28	152	-20.23	13801	18	4000	20
Knm6_2323	CD28	151	-26.93	1541250	22	4000	1453
Knm17_1130	CD2BP2	166	-29.91	661801	20	2219	966
Knm22_1790	CD2BP2	162	-27.48	1098215	23	2219	1118
Knm22_1819	CD2BP2	151	-22.56	4153113	21	2219	1735
Knm5_2934	CD2BP2	158	-23.05	1752836	20	2219	581
Knm6_2419	CD2BP2	148	-21.11	2625664	20	2219	395
Knm7_2944	CD2BP2	158	-20.96	2843871	22	2219	394
Knm10_427	CD300LG	171	-25.69	6942862	21	942	152
Knm11_716	CD300LG	164	-26.61	5633620	21	942	599
Knm16_1165	CD300LG	152	-20.08	5809809	22	406	203
Knm1_77	CD34	168	-22.5	5896415	22	6766	2721
Knm22_1819	CD34	158	-22.06	4150759	21	6766	6277
Knm5_2934	CD34	156	-22.84	1750482	20	6766	2025
Knm6_2323	CD34	150	-21.82	1532275	22	6766	2392
Knm1_317	CD48	151	-22.86	4603119	22	1243	315
Knm17_1130	CD48	152	-25.92	848666	20	673	40
Knm3_1968	CD48	157	-20.69	238979	22	1243	631
Knm5_2192	CD48	163	-22.78	5431013	22	673	546
Knm1_77	CD5	146	-24.8	5909191	22	1567	28
Knm16_1165	CD5	156	-22.9	5690984	22	1567	619
Knm18_1200	CD5	151	-20.61	1326844	21	1567	254
Knm3_1968	CD5	153	-22.73	235809	22	1567	1203
Knm7_2944	CD5	155	-23.48	2854293	22	1567	209
Knm1_227	CD84	152	-22.77	4385926	22	7158	2714
Knm22_1790	CD84	319	-44.51	1112821	23	7158	6292 1133
Knm7_2944	CD84	161	-27.32	2858477	22	7158	3056
Knm16_1165	CD99L2	140	-21.04	5710989	22	492	108
Knm17_1130	CD99L2	150	-21.23	692228	20	492	416
Knm3_1968	CD99L2	153	-23.05	234996	22	4455	3183
Knm6_2323	CD99L2	150	-21.37	1546385	22	667	152
Knm7_2944	CD99L2	296	-42.54	2853480	22	4455	1500 1704
Knm1_272	CDC14B	159	-20.83	3080032	20	3640	1509
Knm22_1819	CDC14B	295	-42.83	4232891	21	3092	786 951
Knm6_2323	CDC14B	151	-20.28	1614407	22	3092	1196
Knm11_716	CDC42BPA	166	-25.82	5467403	21	4403	1318
Knm5_2934	CDC42BPA	149	-20.96	1757884	20	4403	53
Knm6_2323	CDC42BPA	160	-29.64	1539677	22	4403	812
Knm16_1165	CDC42EP2	157	-20.07	5681391	22	898	135
Knm17_1411	CDC42EP2	142	-24.38	5026770	21	898	57
Knm6_2323	CDC42EP2	148	-20.61	1535458	22	898	342
Knm22_1773	CDC42EP3	155	-22.46	6554827	20	3934	1982
Knm22_1819	CDC42EP3	147	-22.75	4154550	21	3934	2171
Knm5_2934	CDC42EP3	151	-21.2	1754273	20	3934	1710
Knm6_2323	CDC42EP3	157	-23.22	1536066	22	3934	1390
Knm7_2944	CDC42EP3	151	-21.26	2845308	22	3934	205
Knm16_1165	CDC42EP4	153	-22.55	5687087	22	1806	1120
Knm5_3166	CDC42EP4	162	-25.58	6341708	21	1806	516
Knm6_2323	CDC42EP4	311	-43.93	1541154	22	1806	1608 508
Knm17_1130	CDH1	148	-20.09	817645	20	1352	54
Knm17_1411	CDH1	147	-20.88	5181202	21	2420	859
Knm5_2934	CDH1	158	-20.82	1749751	20	2049	1166
Knm16_1165	CDH13	163	-22.01	5681326	22	346	172
Knm3_1987	CDH13	159	-20.26	3630893	22	1917	1581
Knm5_3166	CDH13	150	-20.47	6495584	21	285	43
Knm6_2419	CDH13	161	-26.02	2779443	20	5610	4239
Knm11_484	CDH23	143	-20.12	6166591	23	4589	693
Knm16_1165	CDH23	143	-22.46	5730177	22	4589	1522
Knm6_2419	CDH23	157	-24.39	2626809	20	381	248
Knm1_227	CDH4	151	-20.55	4560800	22	3674	1015
Knm11_716	CDH4	146	-21.03	5651835	21	3674	2577
Knm12_604	CDH4	163	-21.25	633074	21	3674	2901
Knm1_77	CDH5	154	-21.1	5904030	22	1617	603
Knm22_1819	CDH5	141	-20.73	4158374	21	1617	113
Knm5_2934	CDH5	142	-20.94	1908408	20	1717	1156
Knm6_2419	CDH5	141	-21.58	2781236	20	1717	175
Knm7_2944	CDH5	146	-21.26	2999443	22	1717	175
Knm12_685	CDH7	144	-22.16	7019034	21	9447	6447
Knm17_1130	CDH7	159	-27.64	788521	20	1179	189
Knm22_1790	CDH7	156	-24.75	1127445	23	9447	5739
Knm1_317	CDH8	156	-23.04	4757463	22	7213	249
Knm16_1165	CDH8	148	-22.65	5848498	22	7213	704
Knm2_1407	CDH8	146	-20.28	1036009	22	5575	4931
Knm6_2323	CDH8	156	-21.7	1706625	22	1865	1696
Knm1_227	CDK18	149	-25.44	4474670	22	1769	780
Knm16_1165	CDK18	152	-23.85	5748503	22	357	28
Knm22_1819	CDK18	156	-23.9	4164303	21	1415	956
Knm1_227	CDK5RAP2	142	-22.13	4447300	22	4546	1731
Knm11_716	CDK5RAP2	316	-49.41	5538335	21	4546	1535 4419
Knm17_1130	CDK5RAP2	156	-25.13	737781	20	4546	18
Knm3_1968	CDKL5	165	-22.15	418723	22	9650	5349
Knm6_2323	CDKL5	150	-20.54	1738963	22	811	642
Knm6_2419	CDKL5	466	-67.93	2819000	20	9650	8597 8773 9127
Knm1_317	CDPF1	153	-26.98	4595077	22	1079	440
Knm10_427	CDPF1	160	-21.74	6777147	21	1079	944
Knm16_1165	CDPF1	160	-26.11	5686112	22	1079	723
Knm10_427	CDR2L	156	-20.98	6778061	21	1726	661
Knm16_1165	CDR2L	156	-22.23	5687026	22	1726	1076
Knm17_1130	CDR2L	303	-51.81	668265	20	1726	179 527
Knm6_2323	CDR2L	153	-21.07	1541093	22	1726	1218
Knm16_1165	CDS2	148	-20.5	5751806	22	7653	6053
Knm17_1130	CDS2	147	-23.59	733045	20	7653	6319
Knm22_1790	CDS2	153	-22.1	1169459	23	7653	7132
Knm7_2512	CDS2	170	-22.63	2260494	20	7653	817
Knm11_716	CDYL2	147	-23.33	5608028	21	472	208
Knm12_604	CDYL2	161	-20.74	606438	21	6482	6373
Knm6_2323	CDYL2	156	-23.41	1680302	22	472	23
Knm7_3340	CDYL2	165	-21.18	2133887	21	6482	4429
Knm1_77	CEACAM3	150	-24.6	5910501	22	329	102
Knm22_1819	CEACAM3	150	-22.91	4186534	21	1045	516
Knm7_2944	CEACAM3	158	-27.71	2877292	22	1045	1
Knm1_77	CEACAM4	153	-23.56	5892517	22	359	87
Knm11_716	CEACAM4	156	-25.38	5456103	21	359	70
Knm6_2323	CEACAM4	157	-25.69	1528377	22	359	164
Knm6_2323	CELF1	298	-43.94	1563544	22	6198	32 439
Knm6_2419	CELF1	152	-23.99	2654579	20	6198	5284
Knm7_2944	CELF1	149	-23.03	2872786	22	6198	5284
Knm1_227	CELF4	155	-22.27	4543725	22	2431	1752
Knm12_604	CELF4	159	-20.26	615999	21	2431	1001
Knm16_1165	CELF4	155	-20.55	5852967	22	2431	82
Knm2_1407	CELF4	175	-32.07	1043820	22	323	62
Knm5_2934	CELF4	145	-20.2	1758219	20	2195	1338
Knm6_2419	CELF4	313	-52.24	2798069	20	2431	855 1432
Knm11_716	CEMIP	152	-25.24	5456067	21	2852	2117
Knm12_604	CEMIP	163	-21.8	437306	21	2852	1698
Knm16_1165	CEMIP	151	-21.17	5674274	22	2852	1962
Knm17_1130	CEMIP	148	-25.82	655513	20	2852	5
Knm5_3166	CEMIP	155	-21.8	6328895	21	2852	630
Knm12_604	CENPC	325	-41.77	444183	21	3857	2681 569
Knm17_1130	CENPC	315	-47.84	662390	20	3857	2089 2249
Knm22_1790	CENPC	156	-23.49	1098804	23	3857	2835
Knm22_1819	CENPC	150	-20.92	4153702	21	3857	2231
Knm7_2944	CENPC	151	-20.66	2844460	22	3857	2373
Knm1_272	CENPO	289	-43.67	3058194	20	3055	2844 2270
Knm1_77	CENPO	154	-21.85	5894885	22	3055	2091
Knm11_716	CENPO	149	-20.12	5458471	21	3055	2848
Knm6_2323	CENPO	154	-23.22	1530745	22	3055	2048
Knm6_2419	CENPO	154	-21.5	2621780	20	3055	2916
Knm22_1790	CENPT	143	-22.56	1241873	23	1176	755
Knm6_2323	CENPT	160	-20.08	1678287	22	1176	217
Knm6_2419	CENPT	157	-21.1	2769322	20	1176	277
Knm16_1165	CENPV	152	-20.11	5682224	22	283	167
Knm18_1200	CENPV	169	-22.55	1394276	21	1222	291
Knm22_1790	CENPV	152	-20.42	1176069	23	1222	556
Knm6_2323	CENPV	145	-23.28	1536291	22	283	1
Knm2_1407	CEP192	158	-23.92	994810	22	7412	4434
Knm22_1819	CEP192	152	-25.52	4325095	21	271	181
Knm5_2934	CEP192	156	-21.91	1867638	20	7412	3080
Knm6_2323	CEP192	155	-23.96	1649431	22	7412	1325
Knm1_227	CEP250	169	-24.18	4396589	22	7654	2125
Knm16_1165	CEP250	156	-23.94	5870316	22	502	94
Knm22_1819	CEP250	150	-22.14	4178382	21	7654	1847
Knm6_2323	CEP250	156	-21.9	1724383	22	502	125
Knm6_2419	CEP250	161	-26.02	2650933	20	7654	6389
Knm1_227	CEP44	153	-21.5	4369463	22	2948	1064
Knm1_317	CEP44	151	-21.44	4587670	22	2948	1621
Knm22_1790	CEP44	154	-20.99	1141837	23	1785	1051
Knm22_1819	CEP44	150	-22.03	4151256	21	2948	894
Knm16_1165	CEP63	150	-22.59	5685530	22	3493	1341
Knm17_1130	CEP63	168	-27.14	666769	20	3493	1961
Knm5_2934	CEP63	162	-22.25	1757804	20	3493	1851
Knm1_317	CEP76	324	-49.64	4767980	22	2965	1398 2030
Knm17_1130	CEP76	152	-22.98	831457	20	2064	1292
Knm22_1790	CEP76	156	-21.48	1276668	23	2965	2834
Knm12_604	CEP85	150	-20.75	438578	21	1515	470
Knm17_1130	CEP85	150	-21.15	725150	20	1745	1665
Knm6_2323	CEP85	155	-25.84	1529613	22	1515	47
Knm6_2419	CEP85	154	-23.1	2620648	20	1515	798
Knm7_2944	CEP85	147	-23.88	2838855	22	1515	1339
Knm1_77	CEP97	160	-21.96	5971608	22	1254	524
Knm16_1165	CEP97	156	-25.07	5682952	22	5011	2003
Knm22_1819	CEP97	150	-22.28	4155503	21	5011	3979
Knm5_3166	CEP97	154	-20.11	6337573	21	5011	2788
Knm17_1130	CERKL	153	-20.61	694627	20	779	142
Knm22_1790	CERKL	154	-20.88	1131041	23	779	153
Knm5_2192	CERKL	155	-21.22	5278475	22	1508	1335
Knm16_1165	CERS3	305	-44.72	5678991	22	2318	809 253
Knm5_2192	CERS3	154	-21.81	5242577	22	2318	1192
Knm5_2934	CERS3	289	-40.94	1751265	20	2318	101 81
Knm6_2323	CERS3	150	-21.12	1533058	22	2318	916
Knm1_227	CES2	161	-21.21	4524708	22	2049	1628
Knm1_317	CES2	145	-22.25	4746768	22	257	169
Knm11_716	CES2	157	-29.66	5467882	21	1071	214
Knm17_1130	CES2	141	-24.28	815189	20	2049	270
Knm22_1819	CES2	148	-21.49	4306501	21	2049	364
Knm5_2934	CES2	160	-22.63	1906224	20	2049	411
Knm12_604	CES3	165	-26.78	445344	21	2047	874
Knm16_1165	CES3	154	-22.77	5682312	22	2047	1189
Knm6_2419	CES3	157	-26.09	2788443	20	714	630
Knm22_1790	CFL2	298	-40.22	1100549	23	6096	3187 4141
Knm22_1819	CFL2	316	-49.04	4155447	21	6096	5624 4228
Knm3_1968	CFL2	155	-21.37	227721	22	6096	4729
Knm1_272	CFLAR	146	-20.71	3065518	20	354	136
Knm16_1165	CFLAR	148	-20.21	5681344	22	12714	2237
Knm3_1968	CFLAR	154	-23.47	273075	22	203	127
Knm11_716	CGNL1	154	-27.99	5462619	21	3237	1866
Knm16_1165	CGNL1	155	-22.9	5680826	22	3237	1645
Knm2_1407	CGNL1	156	-22.01	880272	22	3237	337
Knm22_1790	CGNL1	161	-22.22	1098479	23	3237	1691
Knm7_2944	CGNL1	156	-22.78	2844135	22	3237	1916
Knm1_77	CH507-42P11.8	158	-25.73	6087490	22	2220	688
Knm16_1165	CH507-42P11.8	149	-22.6	5869283	22	2220	1200
Knm5_2934	CH507-42P11.8	151	-21.69	1941557	20	2220	1126
Knm1_317	CHAC1	146	-20.69	4651987	22	745	683
Knm17_1130	CHAC1	165	-30.09	724261	20	745	323
Knm6_2323	CHAC1	158	-26.35	1597089	22	745	224
Knm12_604	CHAF1B	151	-20.75	441808	21	2649	2185
Knm17_1130	CHAF1B	308	-55.2	660015	20	2649	803 1878
Knm22_1790	CHAF1B	149	-20.16	1096429	23	2649	833
Knm22_1819	CHAF1B	154	-23.14	4151327	21	2649	1178
Knm6_2419	CHAF1B	161	-27.06	2623878	20	2649	2450
Knm16_1165	CHCHD5	314	-42.1	5714540	22	2742	2209 63
Knm5_2934	CHCHD5	312	-43.51	1786814	20	2742	1352 1423
Knm5_3166	CHCHD5	166	-22.61	6369161	21	2742	677
Knm17_1130	CHD2	145	-20.84	864687	20	1837	625
Knm22_1819	CHD2	150	-21.89	4351230	21	1352	477
Knm5_2192	CHD2	173	-22.7	5268853	22	3300	315
Knm1_227	CHD5	150	-20.31	4395696	22	2711	752
Knm5_2934	CHD5	150	-21.53	1748383	20	3681	2107
Knm6_2323	CHD5	153	-21.34	1530176	22	3681	438
Knm1_317	CHD7	149	-21.66	4710260	22	376	144
Knm10_427	CHD7	165	-20.39	6895730	21	1360	1333
Knm16_1165	CHD7	152	-20.87	5725441	22	2095	1200
Knm17_1130	CHD7	161	-27.22	706680	20	2095	1710
Knm1_227	CHID1	160	-26.44	4488317	22	438	164
Knm11_484	CHID1	163	-26.24	6122742	23	1462	719
Knm12_604	CHID1	144	-26.71	449360	21	1462	290
Knm6_2323	CHID1	149	-27.04	1540395	22	1462	152
Knm1_317	CHM	154	-23.7	4778612	22	2481	1623
Knm16_1165	CHM	159	-22.58	5869647	22	2481	1604
Knm6_2419	CHM	157	-26.39	2634304	20	3450	1487
Knm16_1165	CHMP1A	154	-26.14	5709102	22	1635	580
Knm5_2934	CHMP1A	146	-20.4	1781376	20	1635	592
Knm7_2944	CHMP1A	150	-23.6	2872411	22	1635	1498
Knm1_317	CHP1	158	-20.95	4596452	22	2501	269
Knm11_484	CHP1	152	-21.61	6123901	23	2501	358
Knm17_1130	CHP1	147	-22.92	811616	20	193	48
Knm5_2934	CHP1	148	-20.59	1759761	20	2501	355
Knm10_427	CHRD	148	-20.18	6814118	21	2193	1111
Knm2_1407	CHRD	162	-22.62	922529	22	2193	198
Knm6_2323	CHRD	160	-24.42	1527790	22	407	197
Knm16_1165	CHRDL1	162	-26.34	5693904	22	2375	1789
Knm22_1790	CHRDL1	155	-20.84	1111557	23	2375	1385
Knm1_227	CHRDL2	152	-21.04	4391378	22	787	650
Knm6_2323	CHRDL2	146	-24.9	1554687	22	787	465
Knm12_604	CHRFAM7A	153	-25.02	442948	21	4527	1729
Knm17_1130	CHRFAM7A	160	-22.28	661155	20	4527	1365
Knm22_1790	CHRFAM7A	156	-21.2	1097569	23	4527	1906
Knm12_604	CHRM2	157	-23.29	507070	21	3989	1162
Knm17_1130	CHRM2	145	-25.37	725277	20	3989	1878
Knm22_1773	CHRM2	152	-20.27	6616866	20	3989	961
Knm1_272	CHRM3	154	-20.05	3057589	20	6228	1769
Knm16_1165	CHRM3	158	-22.78	5676073	22	6228	2279
Knm6_2419	CHRM3	157	-21.16	2621175	20	6228	3362
Knm1_227	CHRM5	167	-21.97	4390232	22	3141	1254
Knm6_2419	CHRM5	165	-27.32	2644576	20	3141	2466
Knm1_317	CHRNA10	152	-20.8	4584509	22	520	78
Knm7_2944	CHRNA10	158	-21.59	2838853	22	520	173
Knm1_77	CHRNA4	155	-24.94	5913905	22	3515	1731
Knm11_484	CHRNA4	145	-20.42	6132112	23	3515	730
Knm11_716	CHRNA4	145	-22.49	5477491	21	3515	1904
Knm17_1411	CHRNA4	153	-27.59	5127665	21	1639	1036
Knm12_604	CHRNA7	148	-23.99	652805	21	882	326
Knm17_1130	CHRNA7	160	-22.28	659546	20	4560	1363
Knm22_1790	CHRNA7	151	-20.9	1304414	23	570	57
Knm5_2934	CHRNA7	166	-23.14	1962047	20	882	764
Knm11_484	CHRNB2	154	-26.92	6130285	23	4094	1214
Knm16_1165	CHRNB2	156	-21.71	5693871	22	4094	1723
Knm6_2323	CHRNB2	437	-68.02	1547938	22	4094	937 965 1901
Knm6_2419	CHRNB2	162	-22.64	2638973	20	4094	1442
Knm1_317	CHRNE	140	-21.01	4587039	22	962	204
Knm16_1165	CHRNE	160	-25.32	5678074	22	962	811
Knm6_2323	CHRNE	159	-21.77	1532141	22	962	483
Knm1_227	CHST11	146	-21.4	4373675	22	4211	1879
Knm3_1968	CHST11	155	-24.94	227742	22	4211	2026
Knm6_2419	CHST11	153	-20.54	2628019	20	4211	2346
Knm11_716	CHST14	153	-23.75	5463247	21	2227	1717
Knm17_1130	CHST14	143	-20.3	662693	20	2227	1413
Knm7_2944	CHST14	159	-23.84	2844763	22	2227	364
Knm16_1165	CHST15	156	-21.79	5875054	22	1429	45
Knm5_3166	CHST15	149	-21.23	6344014	21	2481	1697
Knm6_2323	CHST15	153	-20.42	1729121	22	1429	643
Knm7_2944	CHST15	151	-25.59	3038363	22	1429	697
Knm2_1407	CHST9	156	-21.21	1067942	22	9778	3188
Knm22_1790	CHST9	324	-49.16	1286149	23	9778	9270 5108
Knm6_2323	CHST9	154	-23.32	1722563	22	9778	9496
Knm1_227	CHTF18	154	-20.24	4418676	22	370	137
Knm1_77	CHTF18	153	-22.33	6042664	22	196	154
Knm11_484	CHTF18	154	-25.38	6269776	23	466	143
Knm11_716	CILP	291	-42.35	5457831	21	1973	1283 1782
Knm3_1968	CILP	149	-20.21	220863	22	1973	1369
Knm6_2323	CILP	144	-20.44	1530105	22	1973	1454
Knm1_317	CISD3	150	-21.26	4781703	22	1566	144
Knm1_77	CISD3	157	-20.41	6090945	22	1566	759
Knm5_2934	CISD3	147	-20.03	1945012	20	1566	399
Knm12_604	CISH	148	-30.53	452173	21	1085	377
Knm17_1130	CISH	152	-21.74	670380	20	1085	531
Knm22_1790	CISH	153	-22.11	1106794	23	1085	77
Knm6_2323	CISH	303	-50.12	1543208	22	1085	571 288
Knm1_317	CLASP1	151	-22.77	4585240	22	3085	2138
Knm11_716	CLASP1	154	-24.55	5458068	21	3085	1517
Knm6_2323	CLASP1	147	-25.96	1598930	22	871	591
Knm1_272	CLASP2	146	-20.04	3074338	20	2382	597
Knm16_1165	CLASP2	166	-23.95	5692822	22	2382	1505
Knm3_1968	CLASP2	166	-24.34	231715	22	386	16
Knm1_317	CLCC1	154	-29.82	4600912	22	3039	1146
Knm17_1130	CLCC1	159	-23.46	676344	20	1417	360
Knm22_1819	CLCC1	150	-21.61	4167656	21	1417	665
Knm1_227	CLCN2	151	-23.73	4415046	22	1443	694
Knm1_317	CLCN2	151	-22.26	4793000	22	3340	2107
Knm16_1165	CLCN2	145	-21.1	5884374	22	661	506
Knm2_1407	CLCN2	172	-25.73	1088794	22	1286	556
Knm22_1790	CLCN2	159	-26.27	1141941	23	1443	608
Knm5_2934	CLCN2	154	-23.35	1956648	20	661	437
Knm7_2944	CLCN2	164	-25.2	2887597	22	1443	408
Knm11_716	CLCN4	160	-22.95	5485459	21	4076	2822
Knm17_1130	CLCN4	148	-21.37	684905	20	4076	2201
Knm7_2944	CLCN4	141	-23.56	2866975	22	4076	2442
Knm1_227	CLCN5	160	-20.57	4393921	22	7016	6358
Knm11_484	CLCN5	151	-20.25	6139577	23	7016	1077
Knm7_2944	CLCN5	148	-20.06	2866472	22	7016	3874
Knm17_1130	CLDN1	153	-24.39	660383	20	2576	1722
Knm2_1407	CLDN1	148	-20.28	878590	22	2576	2156
Knm22_2209	CLDN1	158	-21.74	5762	18	2576	2145
Knm11_716	CLDN19	150	-22.91	5464651	21	1993	896
Knm22_1790	CLDN19	160	-23.25	1100511	23	1993	573
Knm6_2323	CLDN19	147	-23.43	1547536	22	873	1
Knm6_2419	CLDN19	147	-20.22	2627960	20	1993	1962
Knm16_1165	CLEC16A	147	-20.14	5676134	22	3894	1510
Knm3_1987	CLEC16A	161	-20.34	3532064	22	507	227
Knm7_2944	CLEC16A	150	-21.13	2839443	22	3894	1448
Knm16_1165	CLEC18A	152	-22.3	5678162	22	627	2
Knm6_2323	CLEC18A	151	-26.47	1532229	22	627	11
Knm7_2944	CLEC18A	159	-25.36	3031752	22	736	681
Knm16_1165	CLEC18B	152	-22.3	5684903	22	375	2
Knm6_2323	CLEC18B	151	-26.47	1538970	22	375	11
Knm7_2944	CLEC18B	159	-25.36	3029906	22	736	681
Knm16_1165	CLEC18C	152	-22.3	5688002	22	375	2
Knm6_2323	CLEC18C	151	-26.47	1542069	22	375	11
Knm7_2944	CLEC18C	159	-25.36	3036337	22	736	681
Knm1_317	CLIP2	150	-23.03	4583019	22	2095	438
Knm11_484	CLIP2	163	-24.88	6110468	23	2095	575
Knm12_604	CLIP2	169	-26.17	437086	21	2095	1030
Knm17_1411	CLIP2	160	-32.04	5019433	21	2095	979
Knm6_2323	CLIP2	156	-31.84	1528121	22	2095	311
Knm1_317	CLK3	315	-47.62	4736794	22	10287	8608 5382
Knm12_604	CLK3	169	-22.38	590861	21	10287	2623
Knm6_2323	CLK3	163	-23.5	1681896	22	10287	2797
Knm7_2944	CLK3	161	-28.87	2854164	22	318	70
Knm10_427	CLK4	157	-20.37	6887920	21	2534	1168
Knm16_1165	CLK4	149	-22.41	5796885	22	2534	822
Knm6_2419	CLK4	146	-21.11	2741987	20	2534	1757
Knm17_1130	CLLU1	153	-21.21	686175	20	2809	1794
Knm5_2934	CLLU1	162	-20.7	1777210	20	2809	608
Knm6_2419	CLLU1	166	-22.8	2650038	20	2809	2094
Knm1_272	CLMN	145	-22.59	3060170	20	9624	7291
Knm1_77	CLMN	320	-47.41	5896861	22	9624	3835 1317
Knm22_1773	CLMN	152	-20.21	6551482	20	9624	2984
Knm22_1790	CLMN	151	-23.56	1096307	23	9624	6281
Knm5_3166	CLMN	162	-22.96	6333275	21	9624	8679
Knm6_2419	CLMN	166	-25.82	2623756	20	9624	4949
Knm7_2944	CLMN	162	-26.65	2841963	22	9624	3999
Knm16_1165	CLN3	153	-22.47	5830056	22	198	21
Knm6_2419	CLN3	161	-26.02	2833285	20	2165	1580
Knm7_2944	CLN3	165	-26.44	3047432	22	574	139
Knm10_427	CLN5	161	-20.03	6975378	21	4148	1780
Knm16_1165	CLN5	144	-21.23	5703394	22	1537	908
Knm22_1819	CLN5	150	-22.03	4238866	21	1725	1222
Knm3_1987	CLN5	162	-24.04	3706789	22	4226	3694
Knm6_2323	CLN5	153	-23.93	1742926	22	4226	295
Knm6_2419	CLN5	161	-27.06	2829445	20	4148	2310
Knm11_716	CLN8	150	-22.88	5465997	21	6003	3309
Knm22_1790	CLN8	153	-22.83	1101857	23	6003	253
Knm6_2323	CLN8	150	-26.28	1538271	22	6003	5623
Knm6_2419	CLN8	157	-26.39	2629306	20	6003	766
Knm1_77	CLSTN3	150	-21.51	5895483	22	864	560
Knm12_604	CLSTN3	144	-20.12	440308	21	864	62
Knm16_1165	CLSTN3	145	-20.81	5677276	22	864	425
Knm6_2323	CLSTN3	152	-26.64	1531343	22	864	21
Knm11_716	CLTB	155	-23.51	5573005	21	908	558
Knm16_1165	CLTB	154	-23.32	5682654	22	319	149
Knm6_2419	CLTB	156	-22.44	2627756	20	319	10
Knm17_1130	CLUAP1	152	-25.53	824106	20	2777	2143
Knm22_1790	CLUAP1	298	-42.86	1257775	23	3912	581 1122
Knm5_3166	CLUAP1	156	-26.22	6491747	21	637	386
Knm6_2323	CLUAP1	299	-42.27	1694189	22	3912	2093 807
Knm16_1165	CLYBL	140	-22.26	5700225	22	5721	783
Knm5_2192	CLYBL	150	-20.19	5263811	22	5721	3451
Knm6_2323	CLYBL	163	-23.46	1572054	22	166	9
Knm17_1130	CMC2	148	-20.79	753647	20	416	1
Knm2_1407	CMC2	155	-22.89	971854	22	416	11
Knm22_1790	CMC2	150	-20.54	1092082	23	9645	5067
Knm6_2419	CMC2	160	-23.8	2784188	20	600	156
Knm11_716	CMIP	143	-20.63	5617613	21	2813	1356
Knm16_1165	CMIP	154	-21.66	5809583	22	1769	866
Knm6_2323	CMIP	146	-23.68	1563207	22	739	81
Knm7_2944	CMIP	151	-20.07	2999129	22	2813	1815
Knm16_1165	CMTM4	162	-23.25	5709734	22	378	5
Knm22_1819	CMTM4	146	-22.15	4159243	21	2527	1648
Knm6_2323	CMTM4	151	-22.2	1563801	22	378	241
Knm12_604	CNGB1	149	-21.1	437963	21	1824	652
Knm22_1819	CNGB1	154	-24.29	4147482	21	1824	109
Knm7_2944	CNGB1	147	-20.32	2842115	22	668	175
Knm12_604	CNIH4	149	-21.61	460560	21	3630	1738
Knm16_1165	CNIH4	157	-22.53	5697528	22	3630	2660
Knm22_1819	CNIH4	150	-21.89	4170079	21	3630	1872
Knm6_2323	CNIH4	316	-50.4	1551595	22	3630	2248 1307
Knm1_317	CNKSR1	149	-23.22	4677573	22	1781	786
Knm1_77	CNKSR1	171	-27.56	5979347	22	609	283
Knm22_1819	CNKSR1	149	-24.2	4241159	21	1781	1394
Knm6_2419	CNKSR1	151	-20.19	2713710	20	1781	1150
Knm20_1603	CNKSR2	160	-21.29	4809313	22	1325	938
Knm21_2196	CNKSR2	159	-20.63	3281864	18	1325	74
Knm7_2512	CNKSR2	170	-20.5	2208030	20	2174	2155
Knm11_716	CNKSR3	148	-23.89	5644183	21	18850	284
Knm17_1130	CNKSR3	168	-26.88	843629	20	18850	14200
Knm6_2419	CNKSR3	301	-43.8	2807492	20	18850	9504 14590
Knm7_2944	CNKSR3	297	-43.85	3025699	22	18850	8263 1288
Knm11_716	CNNM1	140	-21.45	5471602	21	2814	785
Knm5_2934	CNNM1	153	-22.96	1762083	20	2814	1672
Knm6_2419	CNNM1	163	-21.23	2634911	20	2814	1410
Knm11_484	CNNM2	150	-22.04	6133362	23	13041	461
Knm16_1165	CNNM2	307	-47.27	5696948	22	13041	3335 5700
Knm6_2419	CNNM2	293	-42.9	2642050	20	13041	11564 3020
Knm7_2944	CNNM2	305	-48.15	2860257	22	13041	3021 11563
Knm1_272	CNOT3	147	-21.94	3253292	20	2459	368
Knm1_317	CNOT3	312	-51.87	4780741	22	2459	370 1640
Knm12_685	CNOT3	149	-20.79	7181018	21	2459	896
Knm22_2209	CNOT3	155	-20.75	182232	18	300	268
Knm6_2323	CNOT3	151	-25.52	1528327	22	274	52
Knm11_716	CNOT4	150	-21.19	5507683	21	2643	1968
Knm6_2419	CNOT4	161	-25.02	2659491	20	385	340
Knm7_2944	CNOT4	150	-20.66	2889199	22	2643	1969
Knm10_427	CNOT6L	157	-21.54	6869391	21	1716	95
Knm12_604	CNOT6L	156	-20.84	547314	21	7044	1277
Knm18_1200	CNOT6L	159	-20.26	1420142	21	7044	6679
Knm22_1790	CNOT6L	156	-23.65	1201935	23	7044	3110
Knm1_227	CNP	170	-24.47	4398721	22	3807	1383
Knm16_1165	CNP	154	-21.65	5707963	22	3807	2098
Knm5_2934	CNP	160	-21.5	1780237	20	3807	1281
Knm6_2323	CNP	153	-21.85	1562030	22	3807	2144
Knm7_2944	CNP	151	-24.04	2869049	22	1252	356
Knm1_77	CNR2	142	-22.56	5916753	22	4009	1537
Knm16_1165	CNR2	315	-46.6	5698546	22	4009	2223 2906
Knm17_1130	CNR2	168	-27.38	679785	20	4009	2458
Knm22_1790	CNR2	169	-23.53	1116199	23	4009	988
Knm6_2419	CNR2	157	-26.39	2643648	20	4009	1249
Knm1_317	CNTD2	293	-43.34	4582965	22	1299	952 1177
Knm12_685	CNTD2	144	-20.06	6983242	21	1299	274
Knm17_1411	CNTD2	155	-28.75	5019379	21	1299	248
Knm12_604	CNTN2	158	-28.43	448880	21	4519	1032
Knm16_1165	CNTN2	160	-24.74	5685848	22	4519	486
Knm22_1773	CNTN2	155	-20.85	6685407	20	1134	251
Knm22_1819	CNTN2	310	-46.99	4357683	21	3682	2403 1067
Knm11_716	COBL	156	-22.31	5457812	21	1339	1
Knm22_1819	COBL	148	-22.13	4205195	21	2514	1459
Knm6_2323	COBL	160	-30.98	1586711	22	2514	35
Knm11_716	COL22A1	152	-23.34	5464366	21	1018	54
Knm17_1130	COL22A1	148	-25.47	663812	20	1018	620
Knm3_1968	COL22A1	147	-21.76	343750	22	356	152
Knm22_1773	COL27A1	152	-24.72	6657338	20	3873	2985
Knm22_1819	COL27A1	141	-23.69	4257061	21	3873	2492
Knm6_2323	COL27A1	153	-25.38	1545725	22	1816	1032
Knm12_604	COL4A4	145	-20.83	468336	21	4614	1976
Knm17_1130	COL4A4	154	-22.32	686543	20	4614	2714
Knm5_3166	COL4A4	300	-46.23	6359925	21	4614	2519 3871
Knm1_317	COL5A1	158	-21.15	4603341	22	2540	631
Knm1_77	COL5A1	149	-23.67	5912583	22	2540	57
Knm22_1819	COL5A1	148	-20.96	4166927	21	2540	26
Knm1_317	COL6A2	143	-21.57	4591339	22	877	750
Knm11_716	COL6A2	155	-25.48	5464167	21	877	640
Knm17_1411	COL6A2	147	-25.37	5027753	21	877	269
Knm11_484	COL9A2	157	-24.07	6130686	23	695	247
Knm22_1790	COL9A2	153	-22.51	1111925	23	695	10
Knm6_2419	COL9A2	147	-21.69	2639374	20	695	1
Knm10_427	COMMD1	150	-21.72	6810484	21	670	380
Knm11_716	COMMD1	160	-24.84	5501242	21	670	33
Knm18_1200	COMMD1	163	-22.34	1355309	21	670	531
Knm7_2944	COMMD1	155	-22.81	2905354	22	220	186
Knm10_427	COMMD4	152	-21.4	6853044	21	2611	1063
Knm22_1819	COMMD4	150	-22.42	4234560	21	2611	248
Knm6_2419	COMMD4	149	-22.49	2707111	20	2611	1422
Knm1_77	COPS7A	155	-20.36	6038356	22	135	56
Knm22_1819	COPS7A	144	-21.23	4214679	21	1345	215
Knm6_2323	COPS7A	153	-21.36	1596195	22	1345	77
Knm11_484	COPS7B	151	-24.05	6147376	23	2132	161
Knm22_1819	COPS7B	158	-22.06	4160949	21	279	30
Knm5_2934	COPS7B	151	-25.71	1763424	20	1608	243
Knm16_1165	COQ2	146	-21.3	5780719	22	631	504
Knm3_1968	COQ2	155	-20.63	325544	22	631	297
Knm6_2323	COQ2	145	-21.63	1532738	22	476	12
Knm1_317	COQ8B	151	-20.42	4584482	22	505	91
Knm16_1165	COQ8B	154	-23.08	5675517	22	505	367
Knm6_2323	COQ8B	157	-25.8	1529584	22	505	59
Knm1_317	CORO2A	163	-21.41	4596016	22	3799	438
Knm11_484	CORO2A	165	-22.65	6123465	23	3799	611
Knm16_1165	CORO2A	159	-21.84	5687051	22	3799	3156
Knm22_1790	CORO2A	172	-24.75	1104704	23	3799	2873
Knm3_1968	CORO2A	163	-24.1	231876	22	3799	2178
Knm6_2419	CORO2A	157	-22.21	2632153	20	3799	1228
Knm1_317	CORO7	169	-28.41	4584709	22	616	438
Knm1_77	CORO7	163	-24.25	6056201	22	379	279
Knm17_1130	CORO7	148	-21.81	821216	20	346	154
Knm1_77	COX19	143	-26.04	5961756	22	1011	930
Knm11_716	COX19	320	-61.07	5469533	21	3303	2782 3109
Knm7_2944	COX19	140	-23.03	2851049	22	3303	3172
Knm1_272	CPAMD8	160	-20.29	3236461	20	1465	861
Knm1_317	CPAMD8	145	-21.94	4609407	22	3670	2761
Knm17_1130	CPAMD8	319	-57.39	681681	20	3670	199 1237
Knm3_1987	CPAMD8	161	-20.09	3518372	22	3670	3502
Knm12_604	CPD	161	-21.57	437090	21	5175	3515
Knm17_1130	CPD	153	-22.9	655297	20	5175	1692
Knm22_1773	CPD	156	-22.36	6546886	20	5175	4489
Knm6_2323	CPD	160	-24.46	1528125	22	5175	2233
Knm1_317	CPLX4	154	-20.5	4763047	22	1540	1089
Knm1_77	CPLX4	157	-20.27	6072289	22	1540	1235
Knm17_1130	CPLX4	147	-22.96	835321	20	1540	838
Knm5_2934	CPLX4	161	-23.85	1926356	20	1540	327
Knm6_2323	CPLX4	306	-44.28	1708149	22	1540	991 487
Knm22_1790	CPM	156	-20.15	1100779	23	5257	1265
Knm22_1819	CPM	158	-22.06	4155677	21	5257	5024
Knm6_2419	CPM	149	-23.83	2628228	20	5257	3835
Knm7_2944	CPM	145	-21.13	2846435	22	5257	940
Knm1_227	CPNE6	146	-22.1	4513963	22	944	816
Knm17_1130	CPNE6	162	-26.31	688561	20	250	65
Knm22_1773	CPNE6	149	-20.35	6580150	20	250	73
Knm1_77	CPPED1	158	-24.64	5895669	22	1454	196
Knm17_1130	CPPED1	162	-26.91	682499	20	5087	3851
Knm22_1819	CPPED1	151	-23.05	4150013	21	1454	389
Knm6_2419	CPPED1	161	-26.02	2646362	20	5087	1774
Knm22_1790	CPSF2	160	-27.28	1097261	23	10401	10324
Knm22_1819	CPSF2	304	-47.34	4152159	21	10401	2200 1374
Knm6_2419	CPSF2	157	-24.07	2624710	20	10401	6471
Knm1_77	CPSF4	165	-27.68	5900931	22	871	747
Knm16_1165	CPSF4	148	-23.13	5682724	22	871	406
Knm6_2323	CPSF4	309	-43.61	1536791	22	871	740 415
Knm16_1165	CRACR2A	156	-21.78	5688072	22	2611	1942
Knm5_2934	CRACR2A	156	-23.01	1760346	20	2611	1736
Knm6_2323	CRACR2A	179	-30.15	1542139	22	2611	1227
Knm6_2419	CRACR2A	160	-27.46	2633174	20	2611	1220
Knm7_2944	CRACR2A	148	-21.72	2851381	22	2611	1218
Knm1_317	CRAMP1	149	-24.27	4589233	22	3861	1155
Knm17_1411	CRAMP1	162	-31.14	5025647	21	3861	2820
Knm5_2934	CRAMP1	145	-20.08	1752542	20	3861	1700
Knm6_2419	CRAMP1	161	-21.62	2625370	20	3861	119
Knm11_716	CRB2	144	-20.04	5479748	21	1691	661
Knm17_1130	CRB2	149	-20.73	679194	20	1691	961
Knm7_2944	CRB2	148	-26.88	2911890	22	975	587
Knm1_77	CRCP	149	-21.96	5908790	22	2651	161
Knm22_1790	CRCP	329	-49	1108236	23	2651	1774 1583
Knm5_3166	CRCP	160	-23.01	6345204	21	2651	1807
Knm11_716	CRIM1	312	-51.21	5460405	21	2434	593 1470
Knm22_1790	CRIM1	153	-22.47	1096265	23	2434	809
Knm22_1819	CRIM1	154	-22.35	4192980	21	533	321
Knm11_716	CRNKL1	162	-23.04	5548229	21	3836	1471
Knm17_1130	CRNKL1	156	-27.05	747675	20	3836	76
Knm22_1773	CRNKL1	149	-21.39	6639264	20	3836	1353
Knm6_2323	CRNKL1	159	-22.22	1620503	22	3836	761
Knm16_1165	CRTC1	151	-21.73	5686429	22	570	261
Knm5_2934	CRTC1	149	-20.09	1758777	20	4951	3845
Knm6_2323	CRTC1	143	-21.92	1540570	22	4951	3810
Knm6_2419	CRTC1	154	-24.69	2631605	20	4951	580
Knm22_1819	CRTC2	154	-20.67	4152085	21	2007	301
Knm5_2934	CRTC2	157	-20.42	1751808	20	2007	535
Knm7_2944	CRTC2	178	-32.2	2842843	22	2007	1805
Knm17_1130	CRTC3	144	-22.04	809064	20	1041	664
Knm22_1819	CRTC3	154	-24.23	4198903	21	3205	1821
Knm3_1987	CRTC3	172	-22.08	3544282	22	3205	2518
Knm6_2323	CRTC3	297	-42.69	1580419	22	3205	2012 1312
Knm1_272	CRY2	162	-20.56	3110976	20	2336	1625
Knm10_427	CRY2	163	-20.12	6820495	21	2336	1488
Knm16_1165	CRY2	300	-40.81	5729460	22	2336	370 2153
Knm17_1130	CRY2	150	-24.46	710699	20	2336	1222
Knm18_1200	CRY2	159	-20.49	1365320	21	2336	303
Knm22_1773	CRY2	165	-24.34	6602288	20	2336	1539
Knm7_2944	CRY2	162	-32.71	2892769	22	2336	446
Knm1_77	CSF3	152	-24.72	5892789	22	854	269
Knm11_716	CSF3	159	-26.64	5456375	21	854	462
Knm6_2323	CSF3	150	-24.48	1528649	22	854	598
Knm11_484	CSNK1D	148	-20.95	6114489	23	2114	117
Knm16_1165	CSNK1D	150	-21.5	5678075	22	2114	275
Knm17_1130	CSNK1D	147	-25.44	660452	20	727	491
Knm1_272	CSNK1G1	162	-23.58	3062512	20	6414	3839
Knm12_604	CSNK1G1	149	-20.44	646787	21	353	191
Knm16_1165	CSNK1G1	145	-21.71	5889620	22	4031	3147
Knm22_1819	CSNK1G1	149	-21.64	4153547	21	6414	1304
Knm5_2934	CSNK1G1	150	-20.8	1753270	20	6414	570
Knm1_317	CSPG4	150	-21.35	4587479	22	1228	537
Knm17_1130	CSPG4	158	-22.95	659753	20	1228	1054
Knm6_2323	CSPG4	147	-26.41	1532581	22	1228	243
Knm1_227	CTB-50L17.14	148	-24.61	4534931	22	1494	740
Knm16_1165	CTB-50L17.14	147	-20.23	5844173	22	1494	973
Knm22_1819	CTB-50L17.14	154	-22.55	4316724	21	1494	659
Knm16_1165	CTBP1	145	-21.44	5790412	22	3151	2718
Knm6_2323	CTBP1	153	-22.52	1536543	22	792	171
Knm6_2419	CTBP1	147	-20.21	2730601	20	344	5
Knm11_716	CTCFL	159	-26.23	5507158	21	1054	107
Knm16_1165	CTCFL	159	-24.4	5719294	22	1978	1398
Knm17_1130	CTCFL	154	-26.79	701679	20	284	139
Knm22_1819	CTCFL	151	-20.76	4191845	21	1978	1265
Knm6_2419	CTCFL	161	-28.06	2670467	20	1054	554
Knm22_1790	CTD-2021K4.1	153	-22.86	1304748	23	1170	454
Knm22_2209	CTD-2021K4.1	159	-22.5	213050	18	438	102
Knm5_2934	CTD-2021K4.1	140	-23.52	1961806	20	1770	314
Knm6_2419	CTD-2021K4.1	159	-22.83	2831534	20	438	317
Knm1_77	CTD-2207O23.3	157	-26.04	6088265	22	1597	940
Knm22_1819	CTD-2207O23.3	145	-26.06	4342609	21	1597	991
Knm5_2934	CTD-2207O23.3	145	-20.53	1942332	20	1597	1345
Knm7_2944	CTD-2207O23.3	154	-23.18	3033367	22	1597	905
Knm11_716	CTD-2501B8.1	149	-21.1	5616332	21	2597	1571
Knm17_1130	CTD-2501B8.1	301	-49.28	815778	20	2597	539 43
Knm6_2323	CTD-2501B8.1	145	-22.13	1688606	22	2597	1215
Knm1_77	CTD-3138B18.4	151	-22.67	6104495	22	2559	457
Knm11_716	CTD-3138B18.4	304	-49.02	5668081	21	2559	341 1735
Knm6_2323	CTD-3138B18.4	169	-27.69	1742860	22	1148	1107
Knm1_317	CTD-3214H19.4	146	-21.49	4769468	22	392	336
Knm1_77	CTD-3214H19.4	163	-27.79	6078710	22	392	68
Knm3_1987	CTD-3214H19.4	161	-22.61	3675049	22	617	401
Knm16_1165	CTDSP2	152	-20.31	5710050	22	3675	1467
Knm17_1130	CTDSP2	146	-20.07	691289	20	3675	1412
Knm7_2944	CTDSP2	154	-24.02	2873359	22	3675	2413
Knm1_317	CTIF	165	-29.05	4611975	22	2347	117
Knm16_1165	CTIF	146	-21.52	5677115	22	3658	3557
Knm22_2209	CTIF	160	-20.47	3733	18	3658	465
Knm1_317	CTNS	140	-20.71	4582491	22	1169	796
Knm11_484	CTNS	148	-23.27	6109940	23	1169	47
Knm11_716	CTNS	146	-24.01	5455319	21	1169	131
Knm5_2934	CTNS	142	-20.86	1745800	20	1169	872
Knm6_2323	CTNS	149	-20.19	1527593	22	1169	21
Knm17_1130	CTRC	168	-26.88	684487	20	2914	1918
Knm22_1819	CTRC	150	-22.03	4175799	21	2914	2377
Knm5_2934	CTRC	161	-25.61	1775522	20	2914	344
Knm1_317	CTSB	156	-21.36	4598469	22	2601	443
Knm21_2146	CTSB	155	-20.87	2416399	19	2601	920
Knm6_2419	CTSB	147	-20.52	2634606	20	2601	200
Knm1_317	CTSC	157	-22.52	4710417	22	5622	984
Knm6_2323	CTSC	147	-21.95	1655519	22	5622	2995
Knm6_2419	CTSC	161	-21.52	2746554	20	5622	48
Knm10_427	CTSD	163	-20.16	6766603	21	751	238
Knm5_2934	CTSD	140	-23.62	1808157	20	1133	47
Knm6_2323	CTSD	152	-21.29	1529635	22	751	402
Knm1_317	CTSV	157	-27.58	4717502	22	3270	1670
Knm12_604	CTSV	174	-27.52	571569	21	3270	2428
Knm22_1790	CTSV	165	-20.44	1226190	23	3270	1111
Knm11_716	CTU2	169	-30	5462373	21	166	8
Knm6_2323	CTU2	151	-24.27	1687301	22	1328	876
Knm7_2944	CTU2	159	-30.59	2996543	22	1328	55
Knm16_1165	CTXN2	155	-23.18	5714420	22	2210	631
Knm22_1790	CTXN2	157	-22.89	1132073	23	2210	330
Knm6_2419	CTXN2	147	-23.54	2659522	20	2210	542
Knm1_317	CUEDC1	158	-25.47	4745986	22	2046	1968
Knm16_1165	CUEDC1	167	-29.37	5837021	22	2046	1717
Knm17_1130	CUEDC1	150	-20.84	818260	20	2046	1998
Knm6_2323	CUEDC1	150	-20.14	1691088	22	2046	650
Knm11_484	CXCL12	165	-27.48	6130503	23	3163	2491
Knm16_1165	CXCL12	158	-28.52	5694089	22	3163	1065
Knm6_2323	CXCL12	153	-21.7	1537944	22	1500	762
Knm7_2944	CXCL12	305	-52.13	2857398	22	3163	1004 933
[truncated: 8,273 more rows]
